# Supplementary material for: Genomic Identification of Founding Haplotypes Reveals the History of the Selfing Species Capsella rubella
Source: PubMed Central journal article supplement (PMC3772084; doi:10.1371/journal.pgen.1003754), 2013-09-12

S9\_A.1)

Cr81 (Greek), Chromosome 1

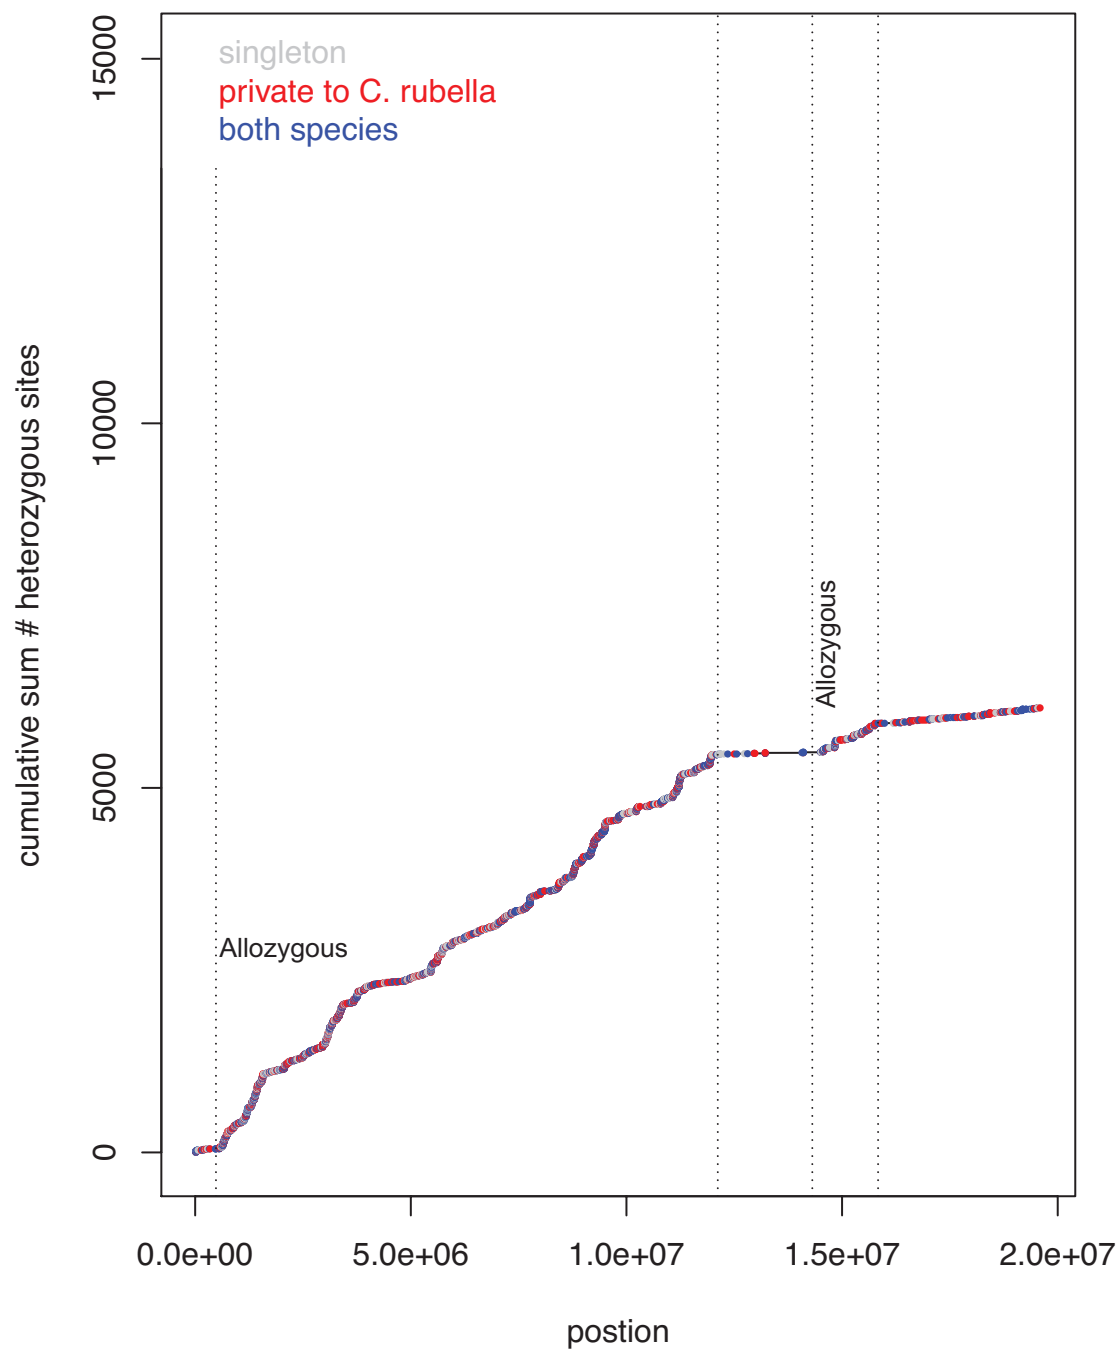

S9\_A.2)

Cr81 (Greek), Chromosome 2

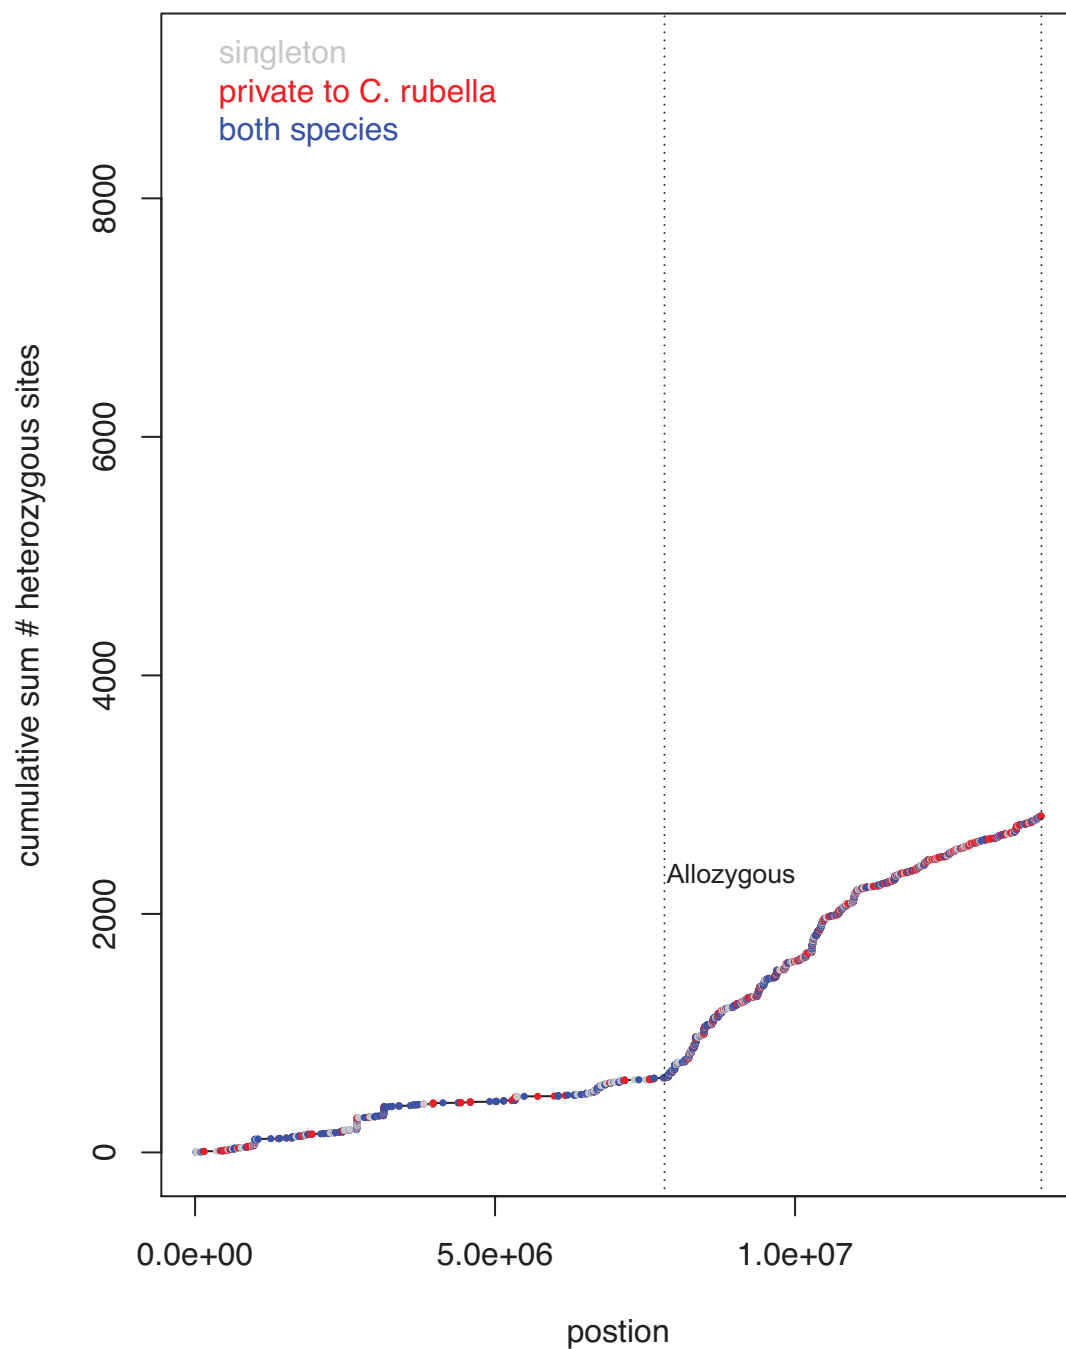

S9\_A.3)

Cr81 (Greek), Chromosome 3

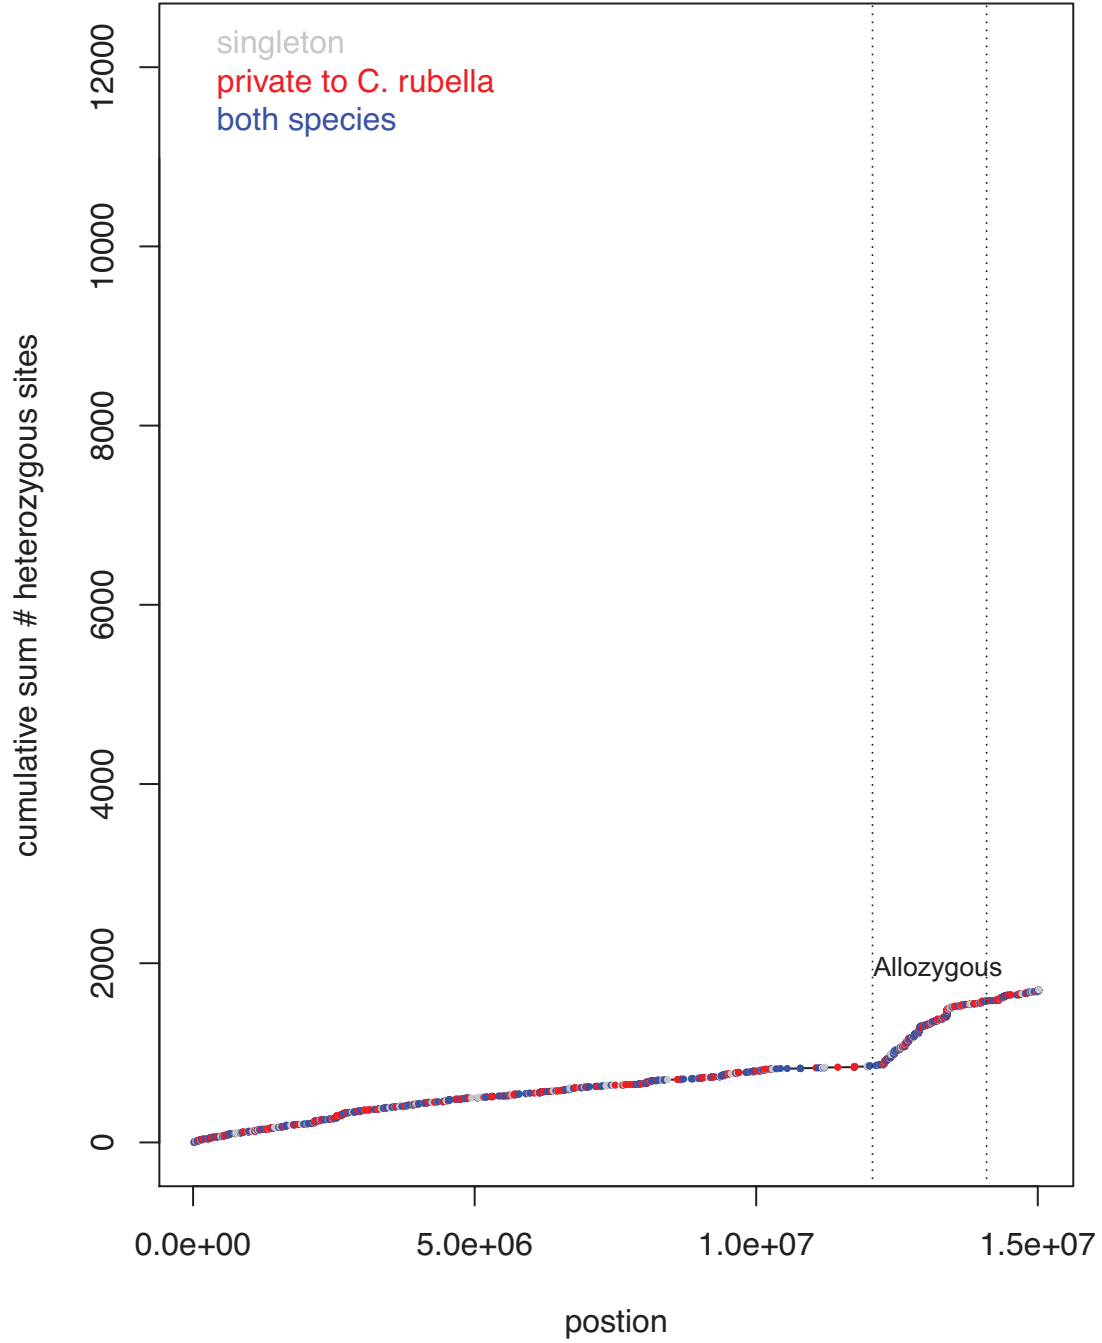

S9\_A.4)

Cr81 (Greek), Chromosome 4

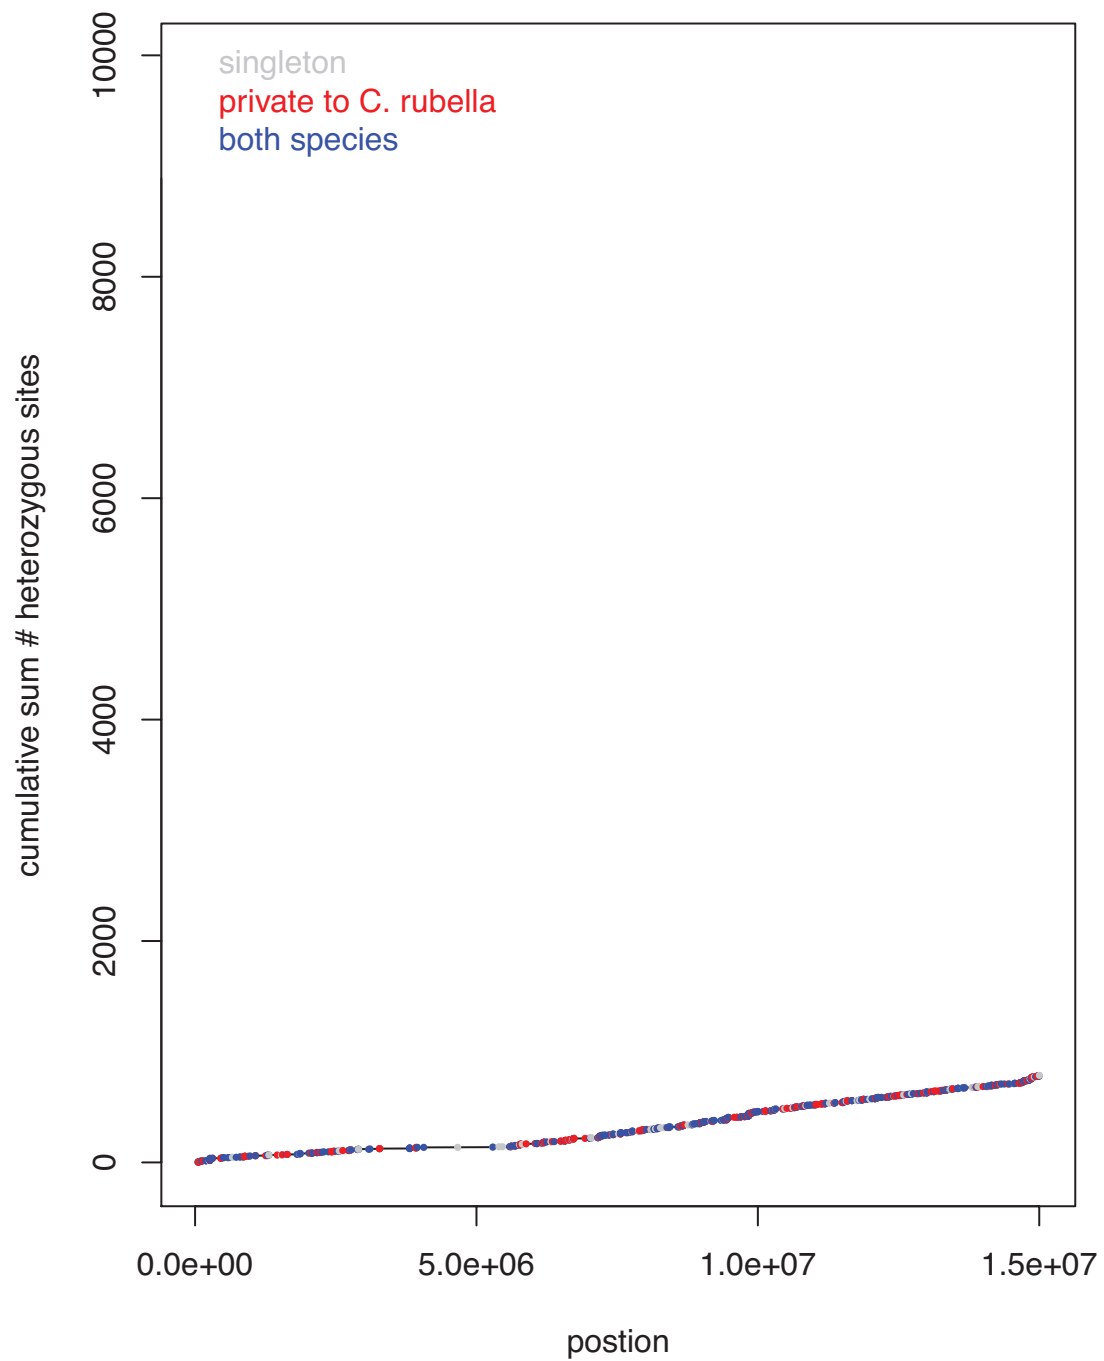

S9\_A.5)

Cr81 (Greek), Chromosome 5

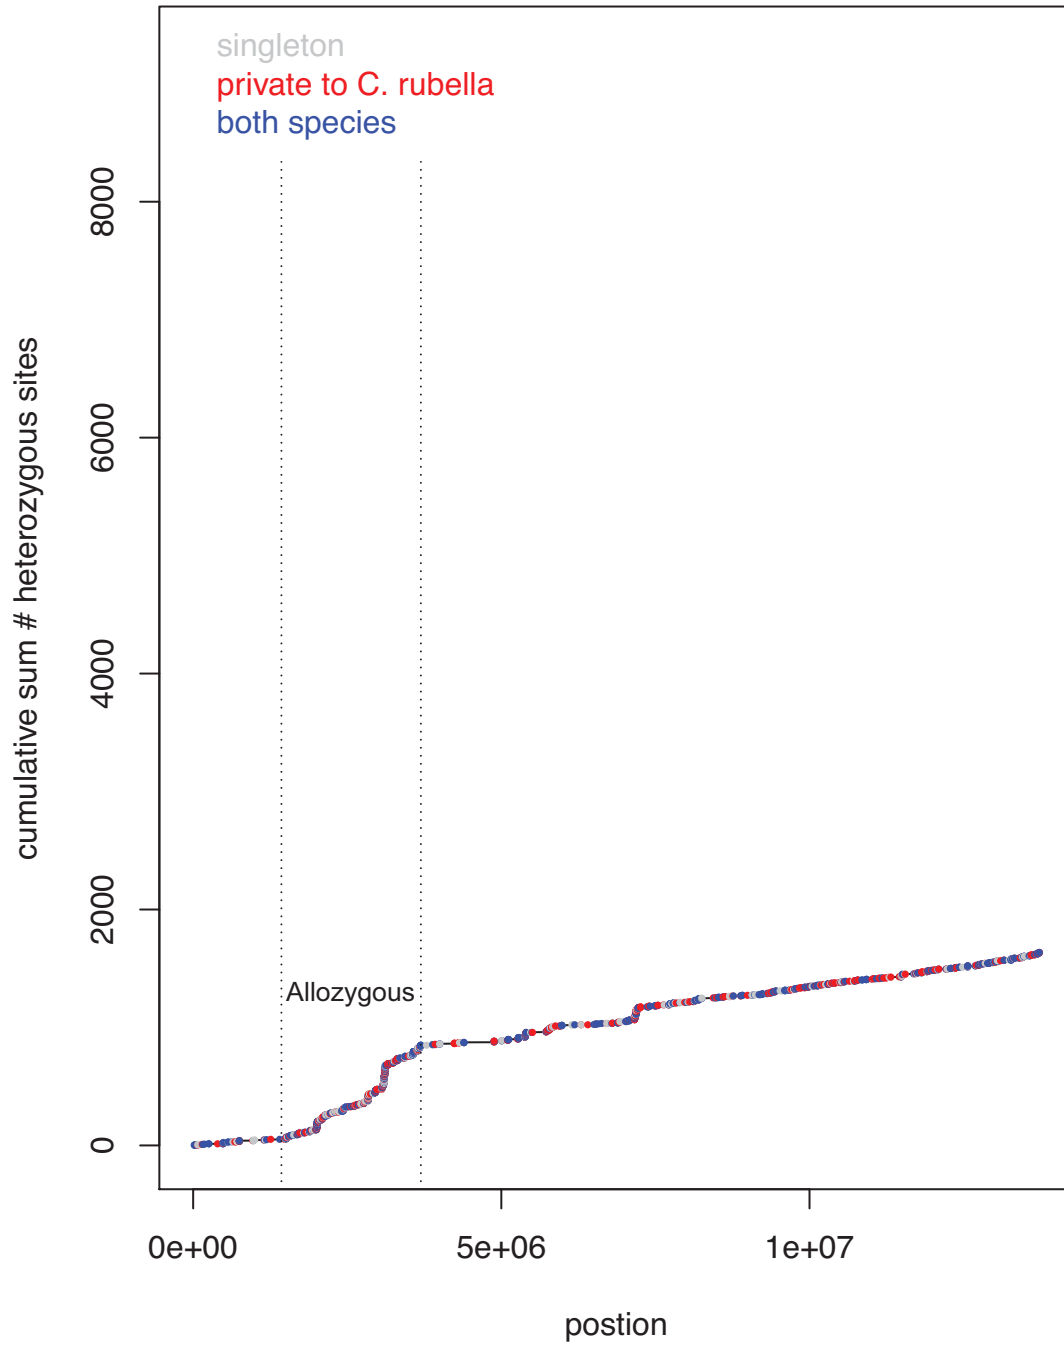

S9\_A.6)

Cr81 (Greek), Chromosome 6

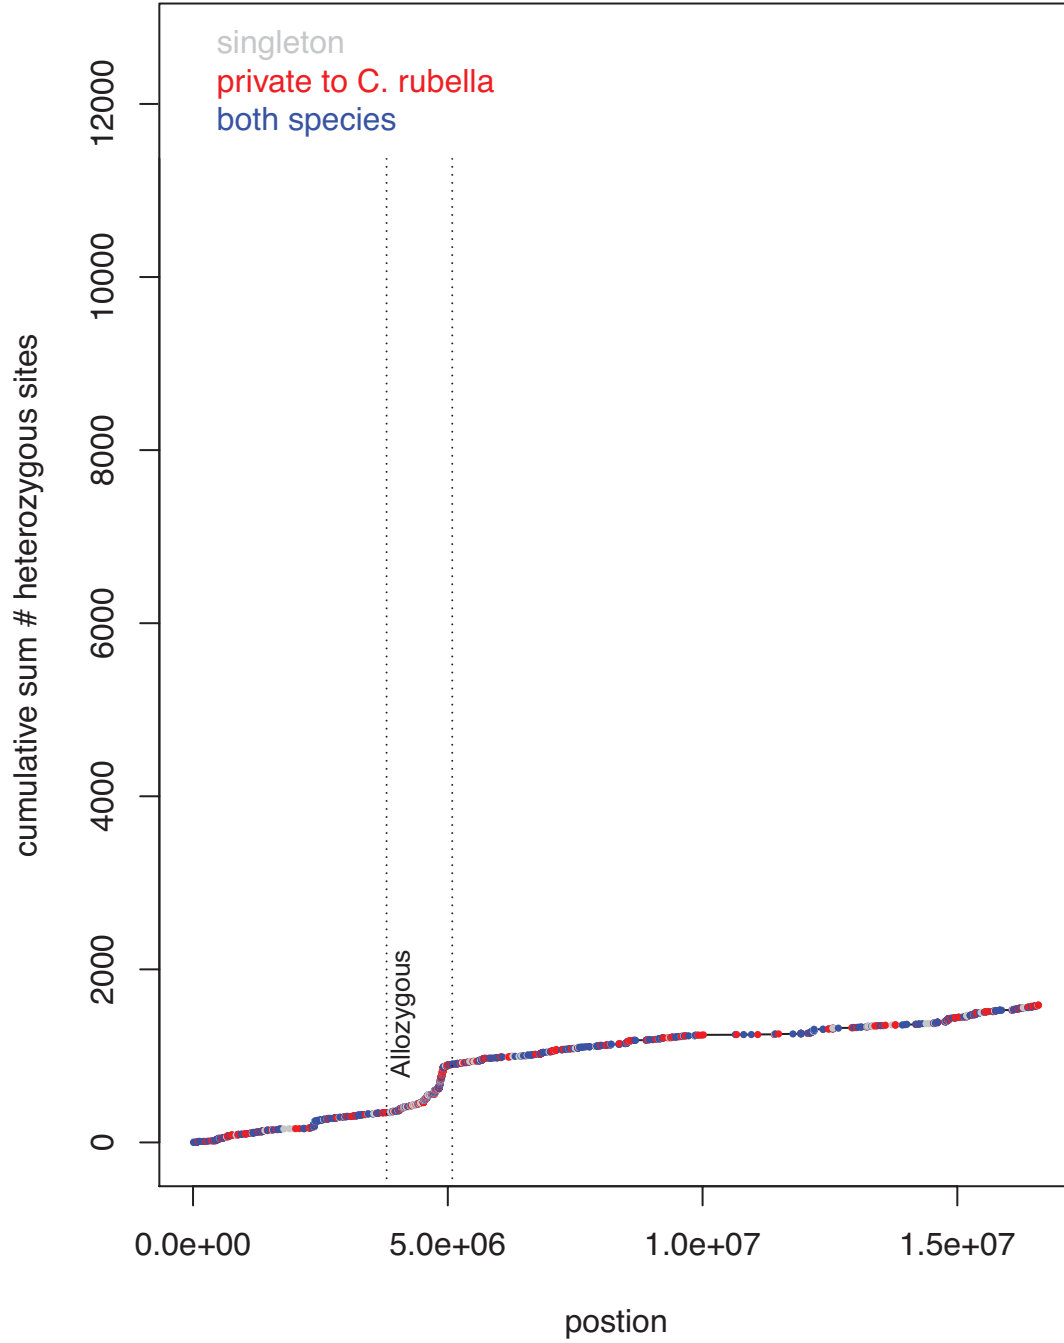

S9\_A.7)

Cr81 (Greek), Chromosome 7

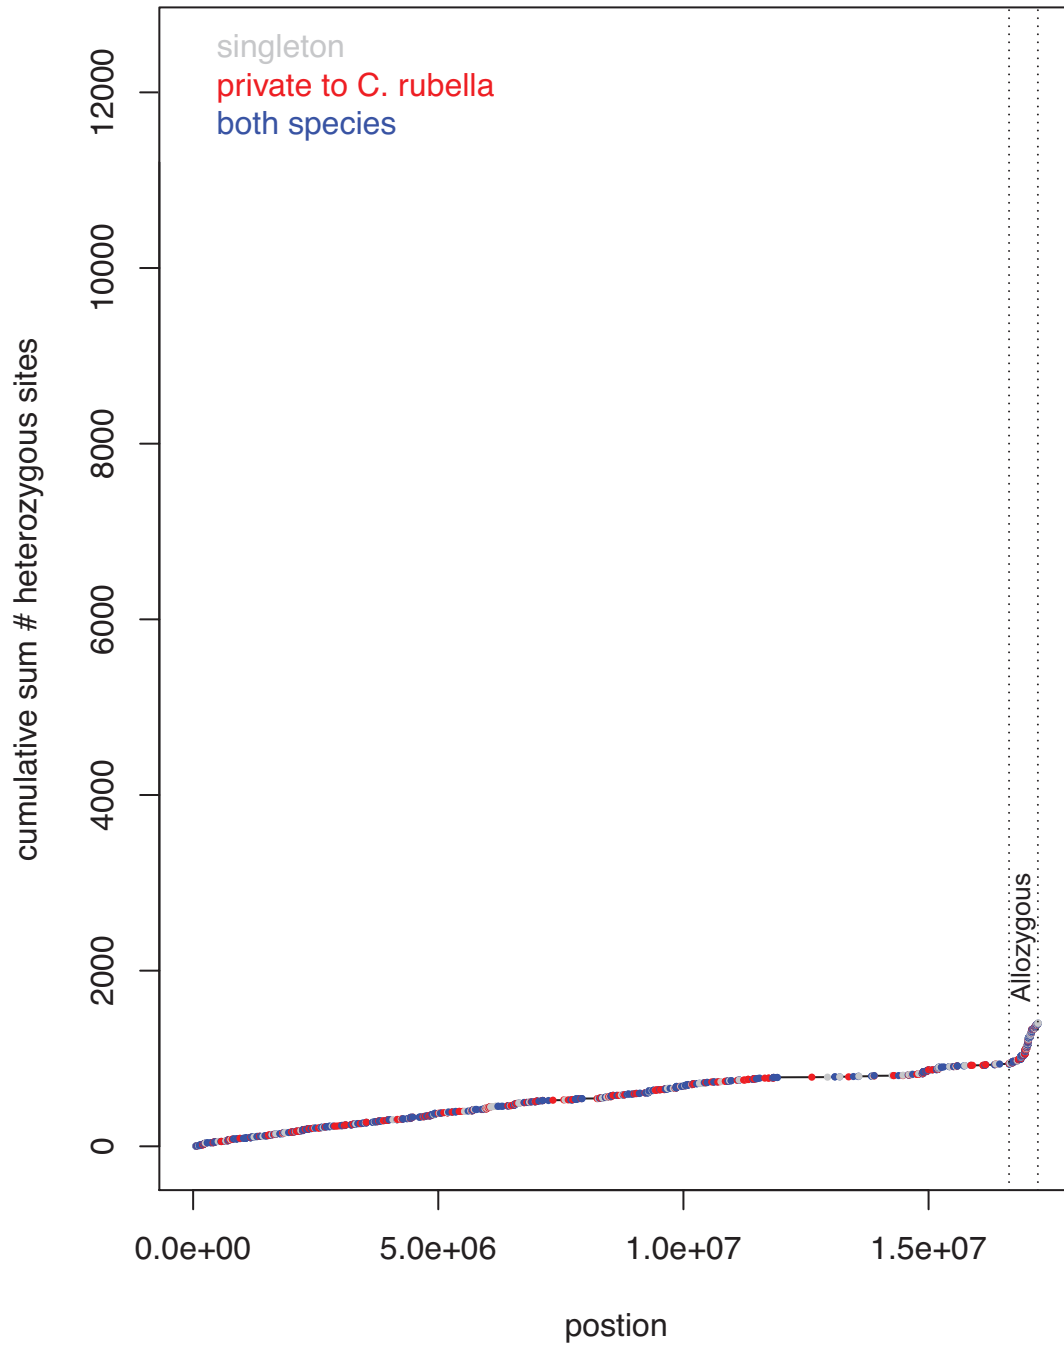

S9\_A.8)

Cr81 (Greek), Chromosome 8

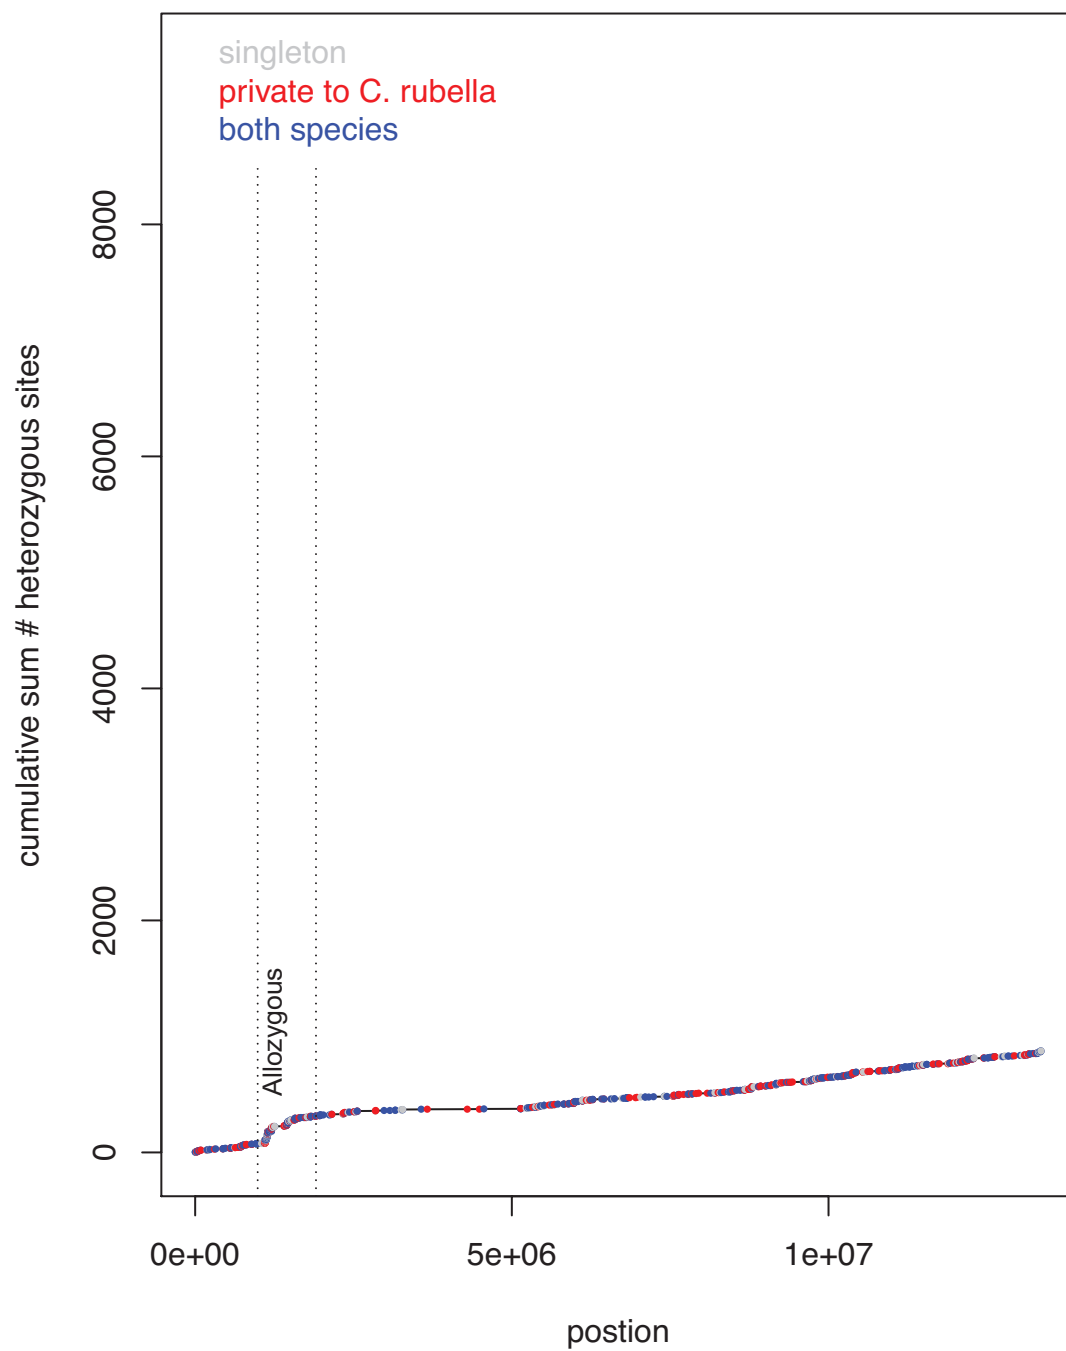



S9\_B.1) Cr1Gr1 (Greek, lab inbred), Chromosome 1

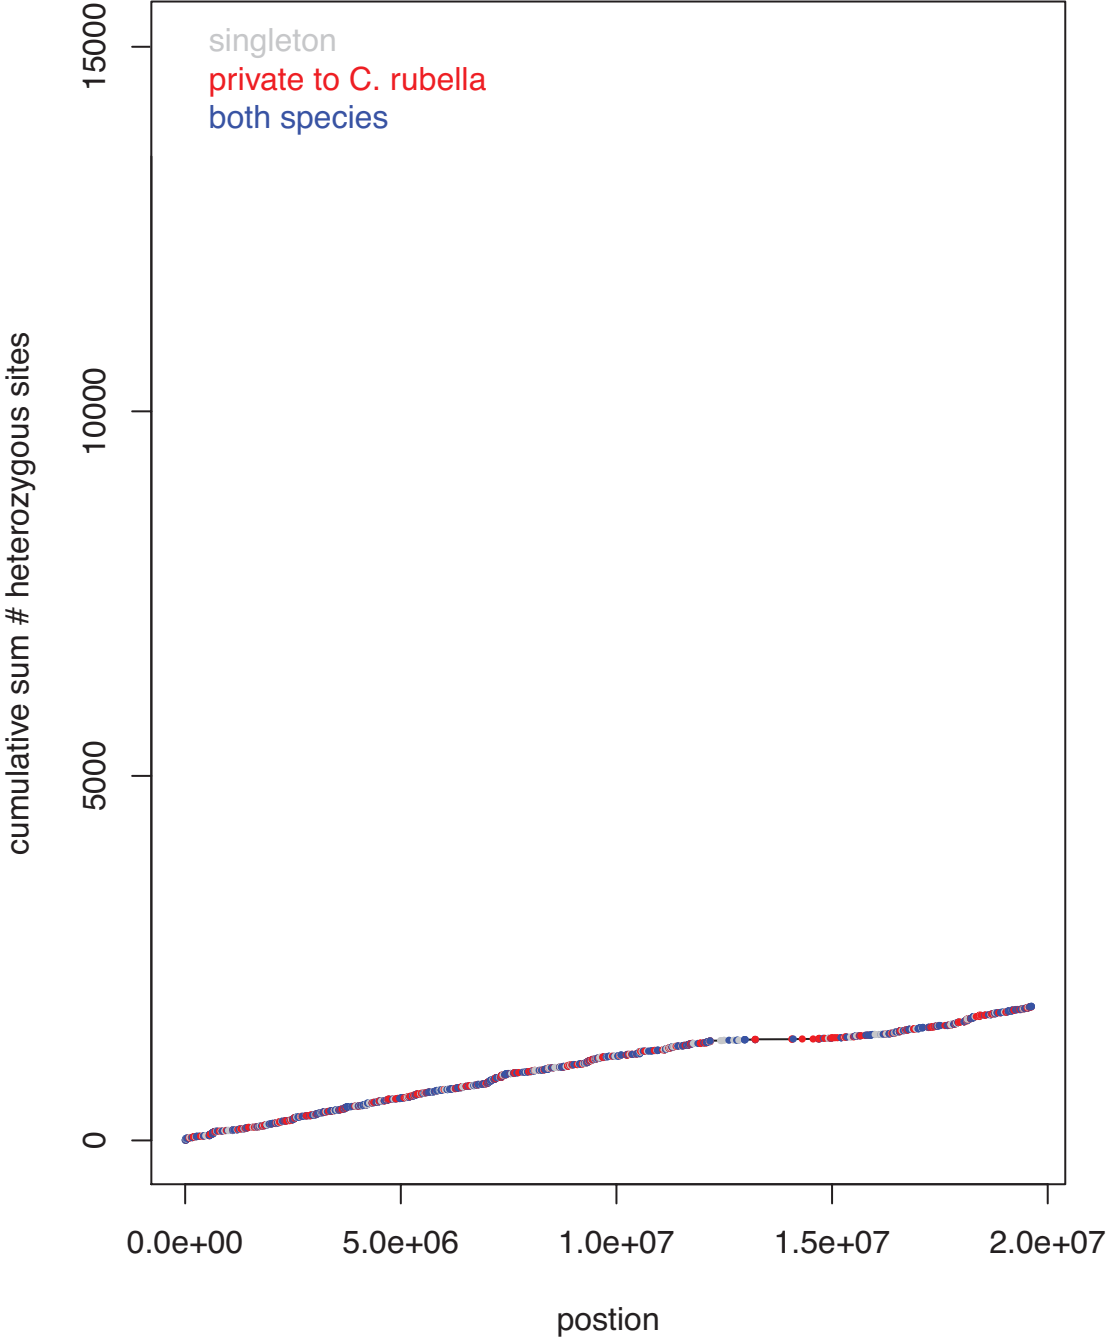

S9\_B.2) Cr1Gr1 (Greek, lab inbred), Chromosome 2

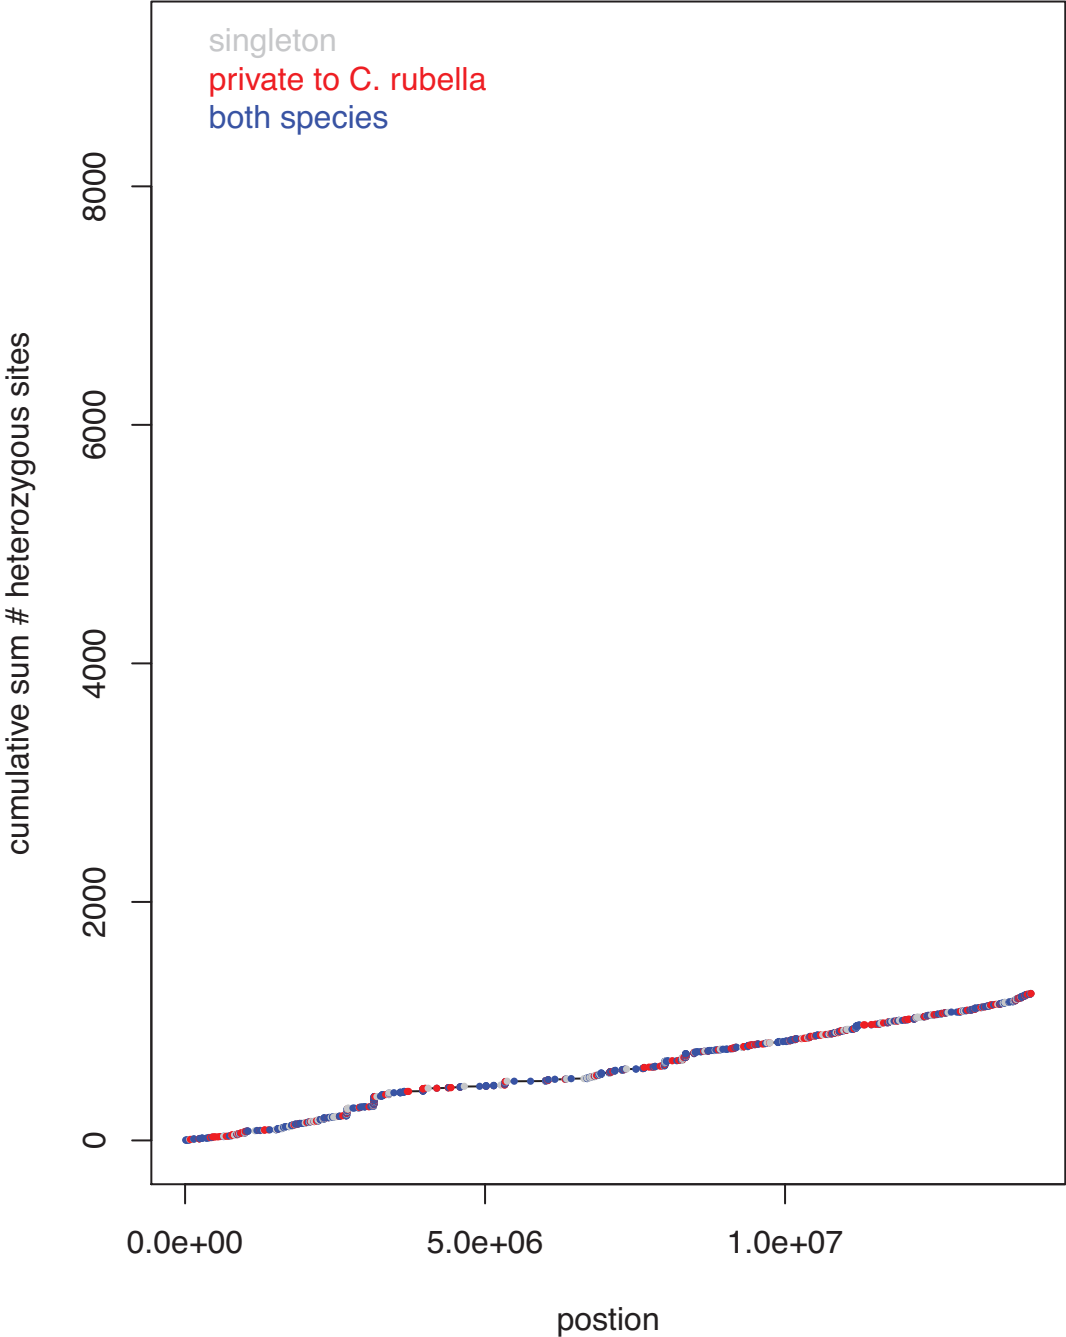

### S9\_B.3) Cr1Gr1 (Greek, lab inbred), Chromosome 3

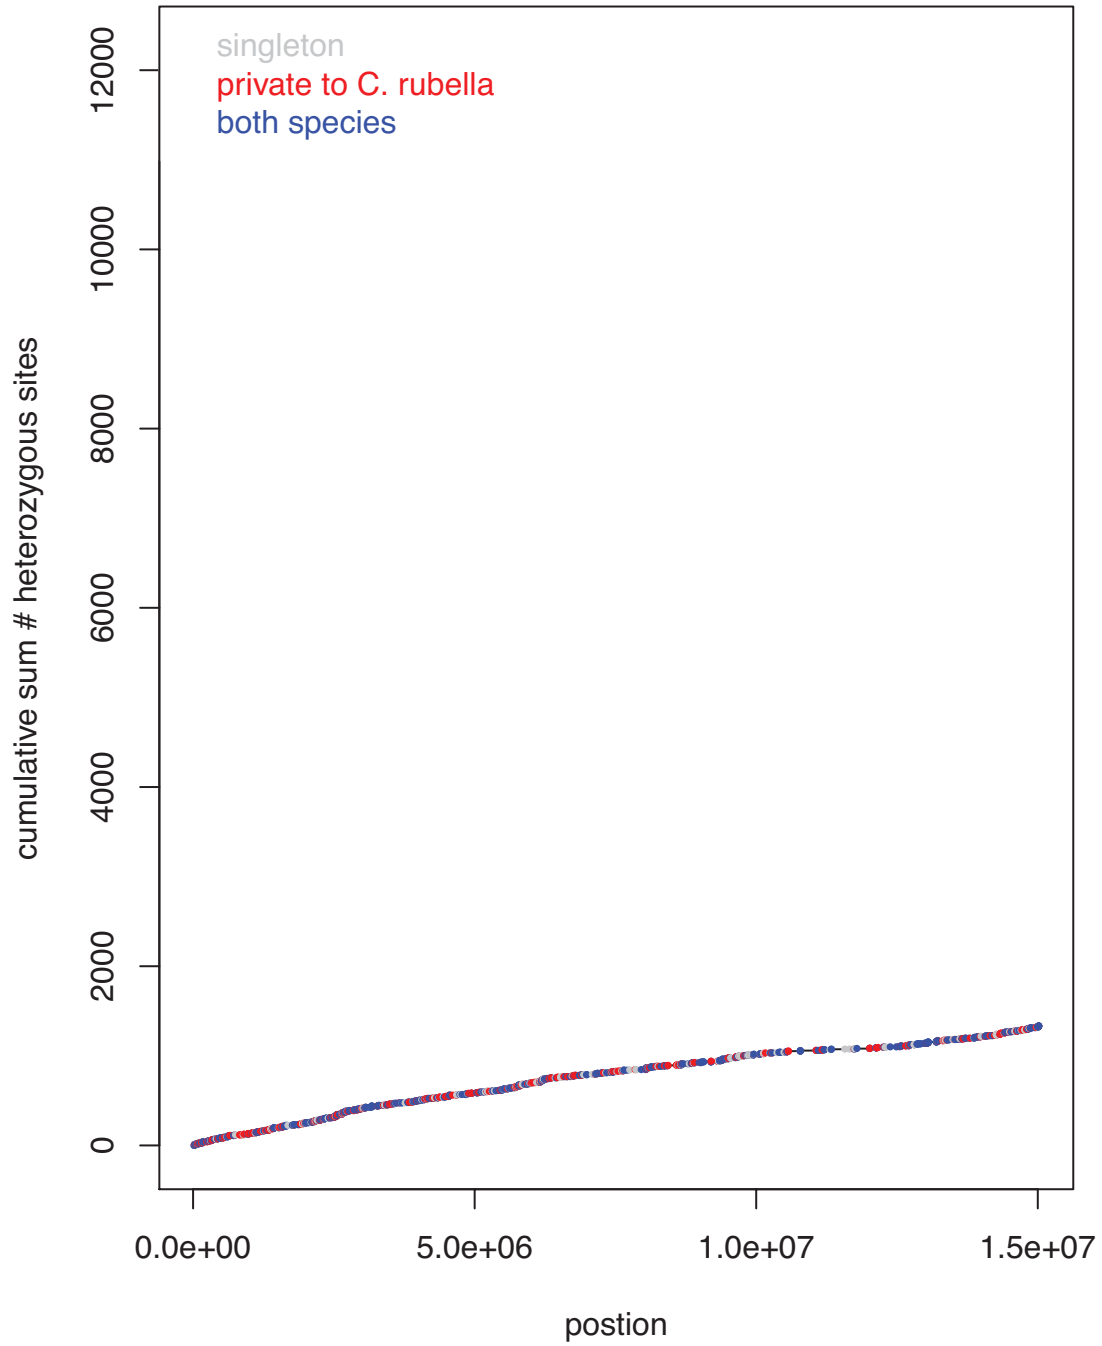

### S9\_B.4) Cr1Gr1 (Greek, lab inbred), Chromosome 4

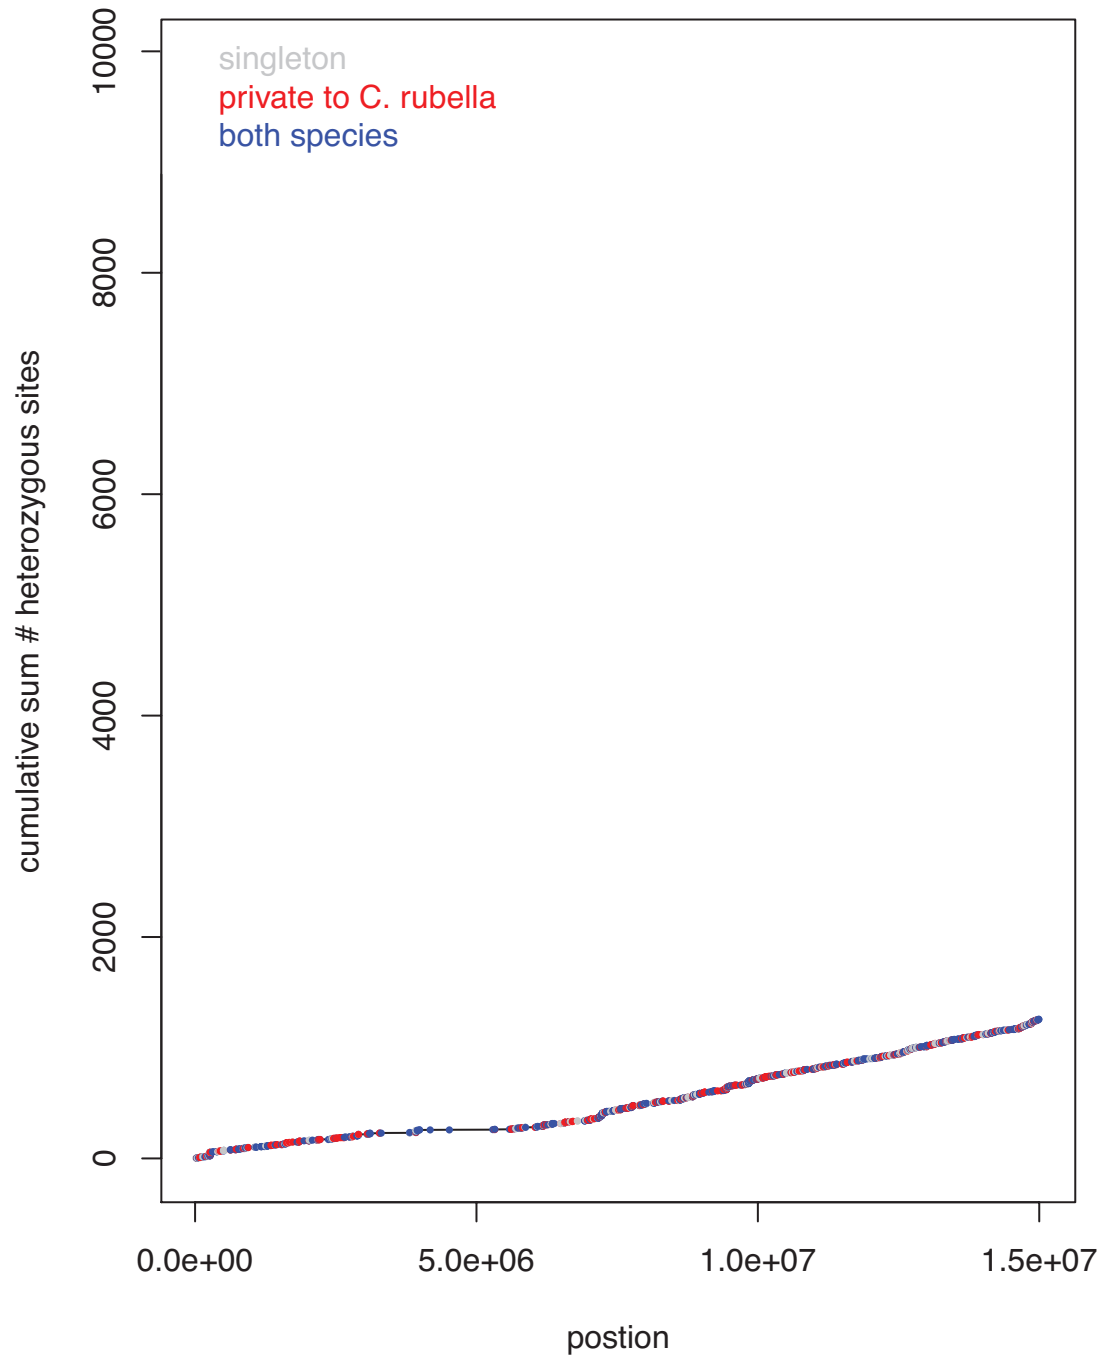

S9\_B.5) Cr1Gr1 (Greek, lab inbred), Chromosome 5

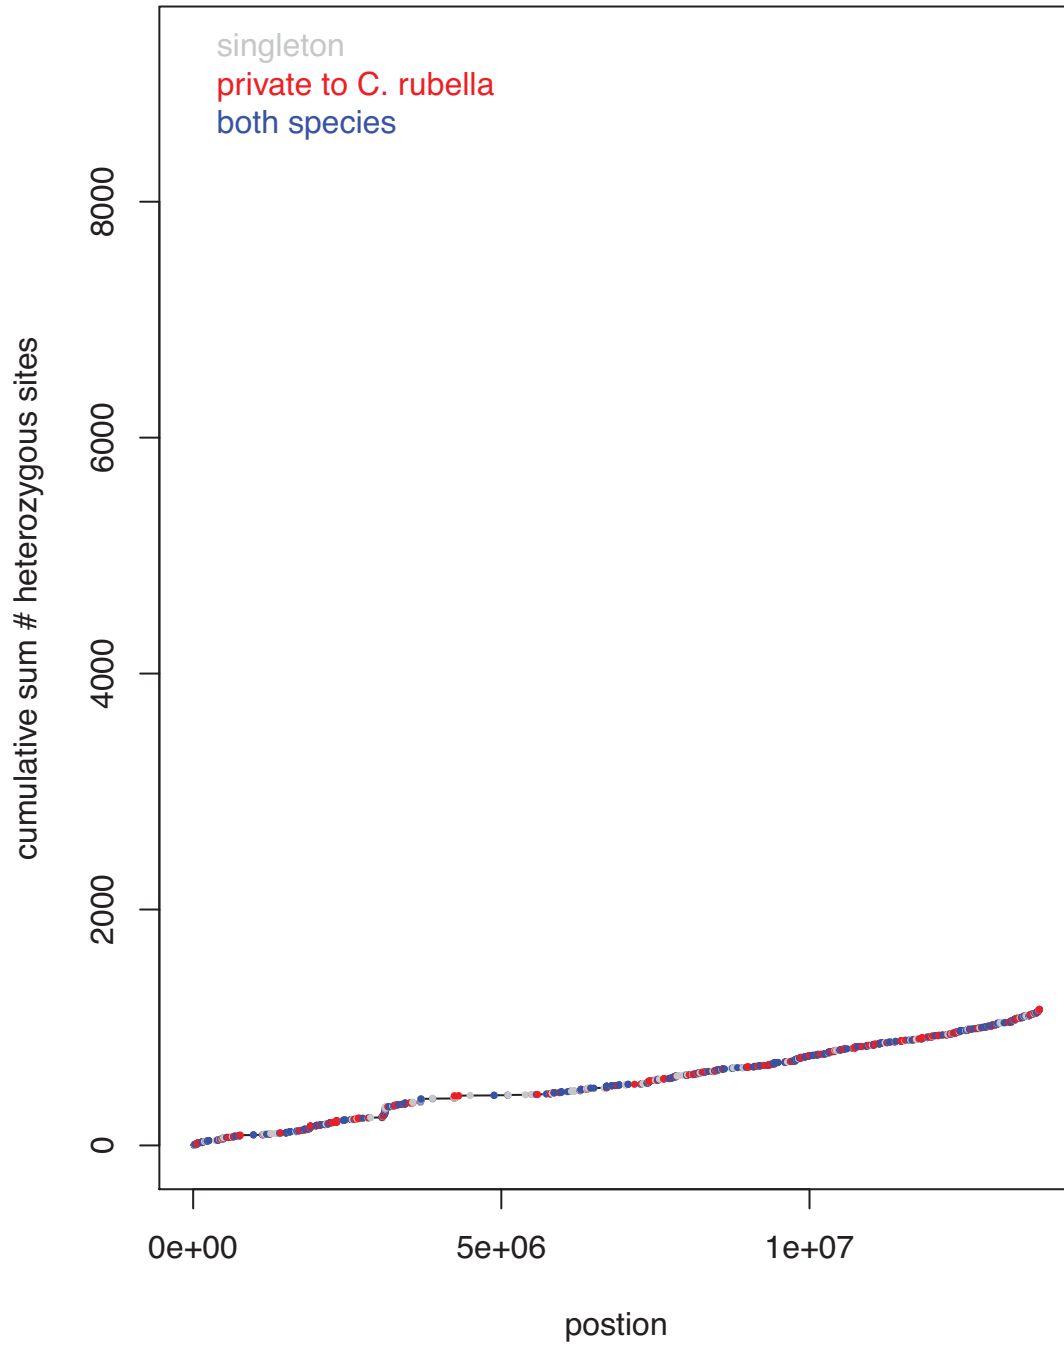

S9\_B.6) Cr1Gr1 (Greek, lab inbred), Chromosome 6

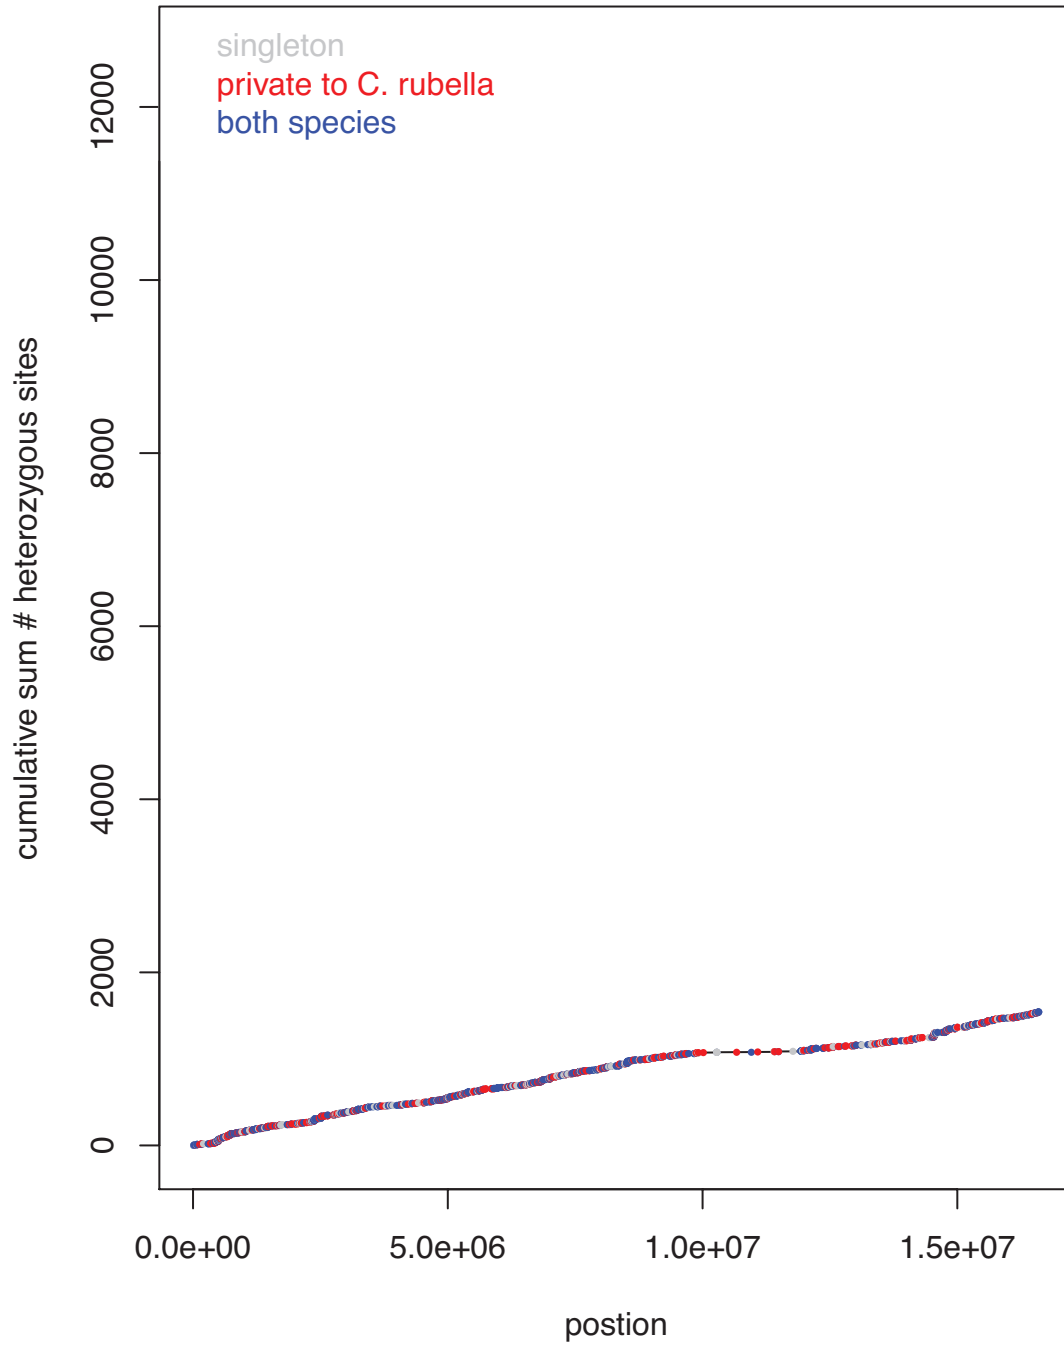

S9\_B.7) Cr1Gr1 (Greek, lab inbred), Chromosome 7

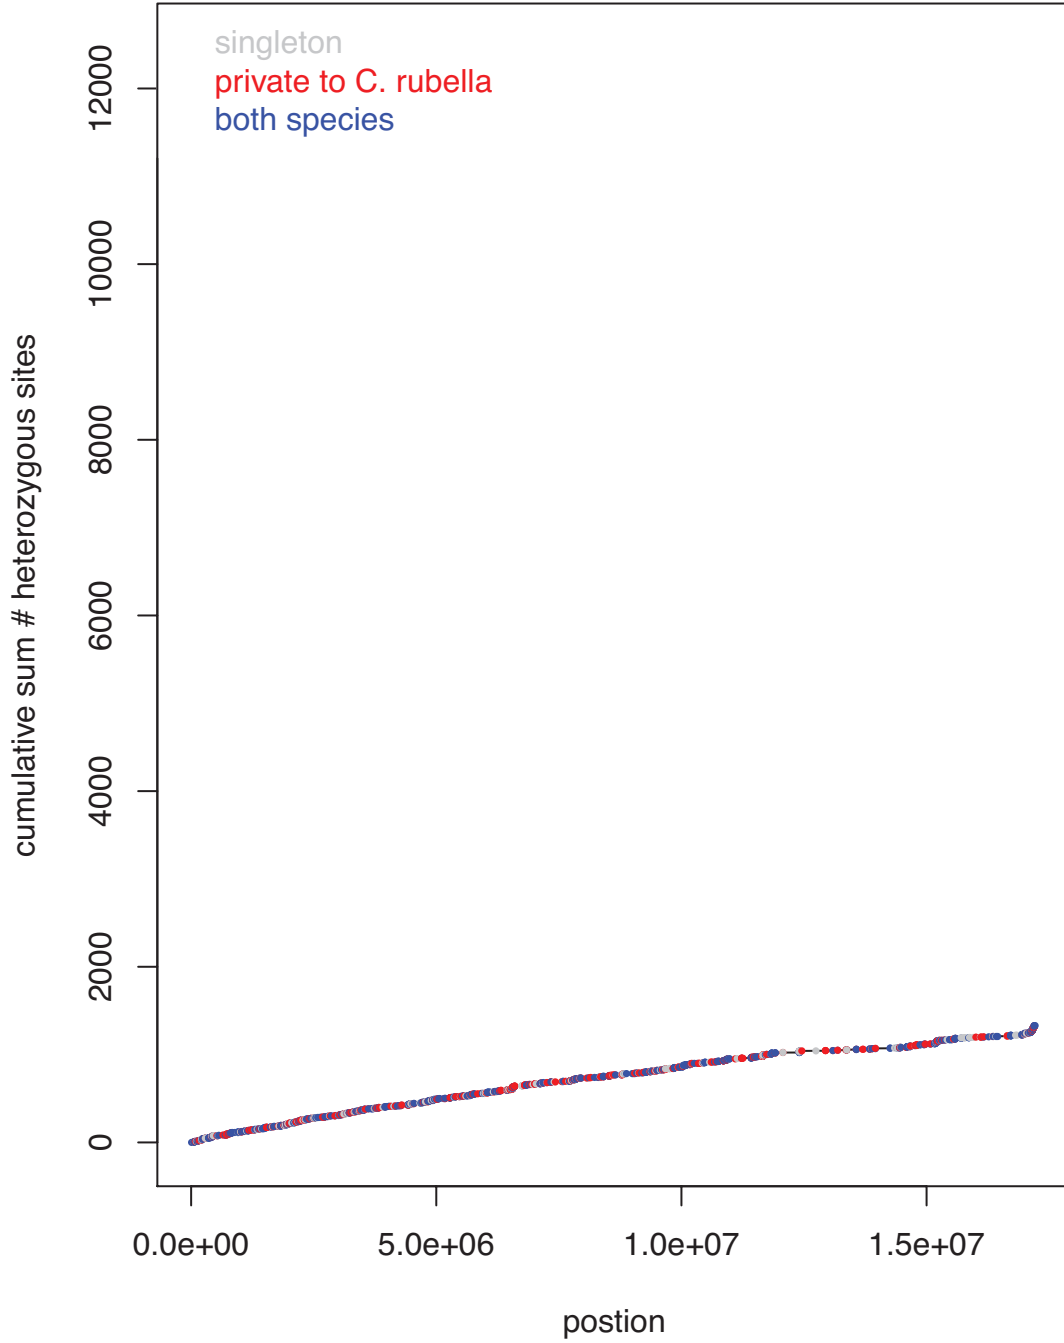

S9\_B.8) Cr1Gr1 (Greek, lab inbred), Chromosome 8

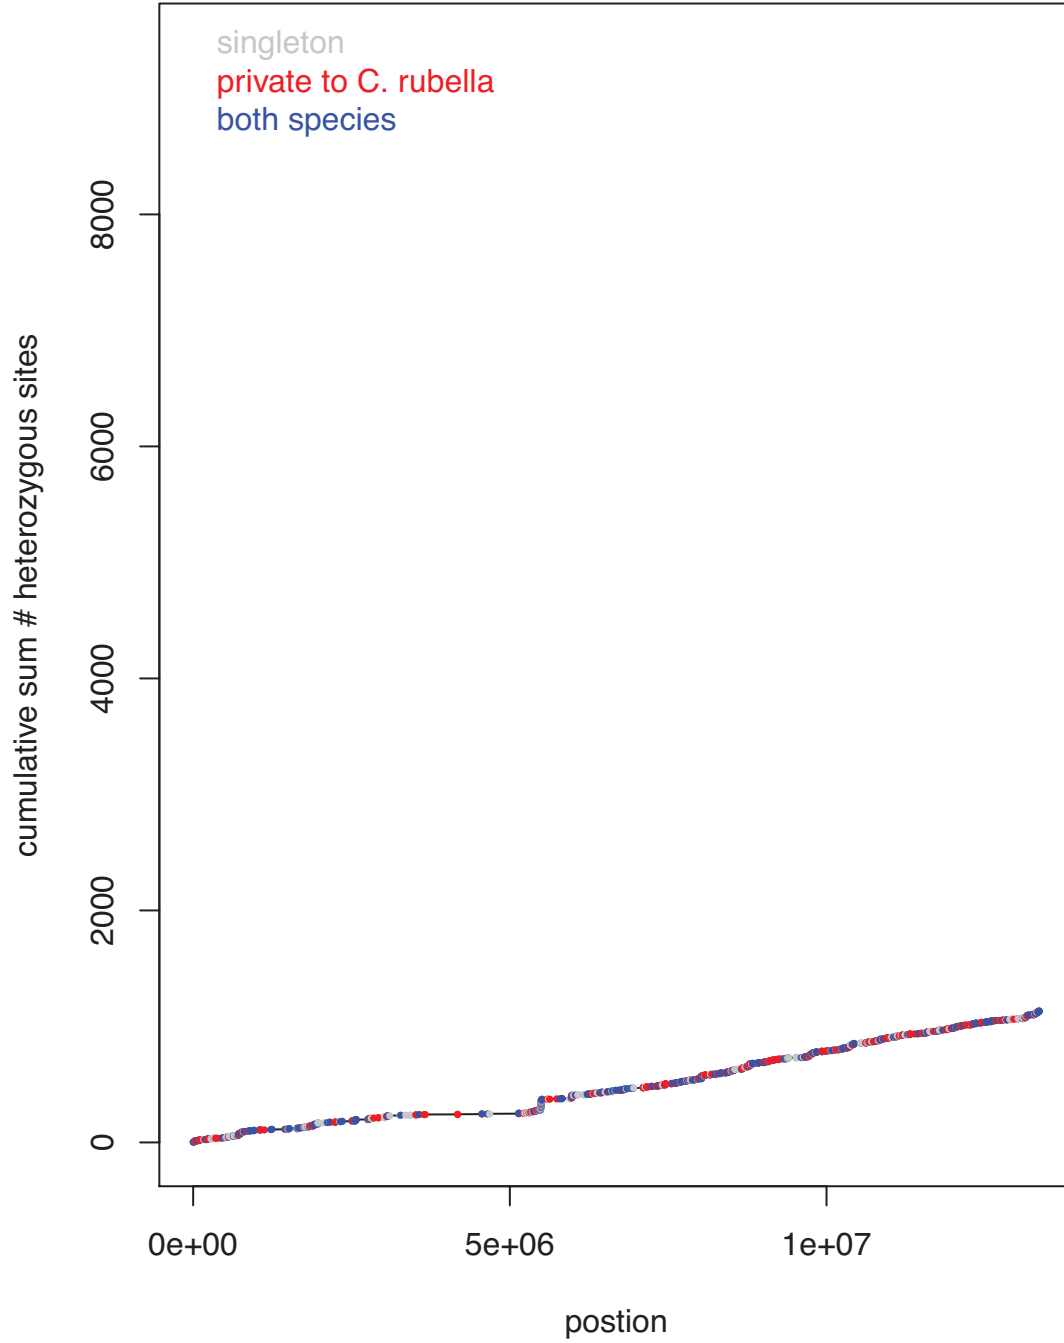



S9\_C.1)

Cr34 (Italian), Chromosome 1

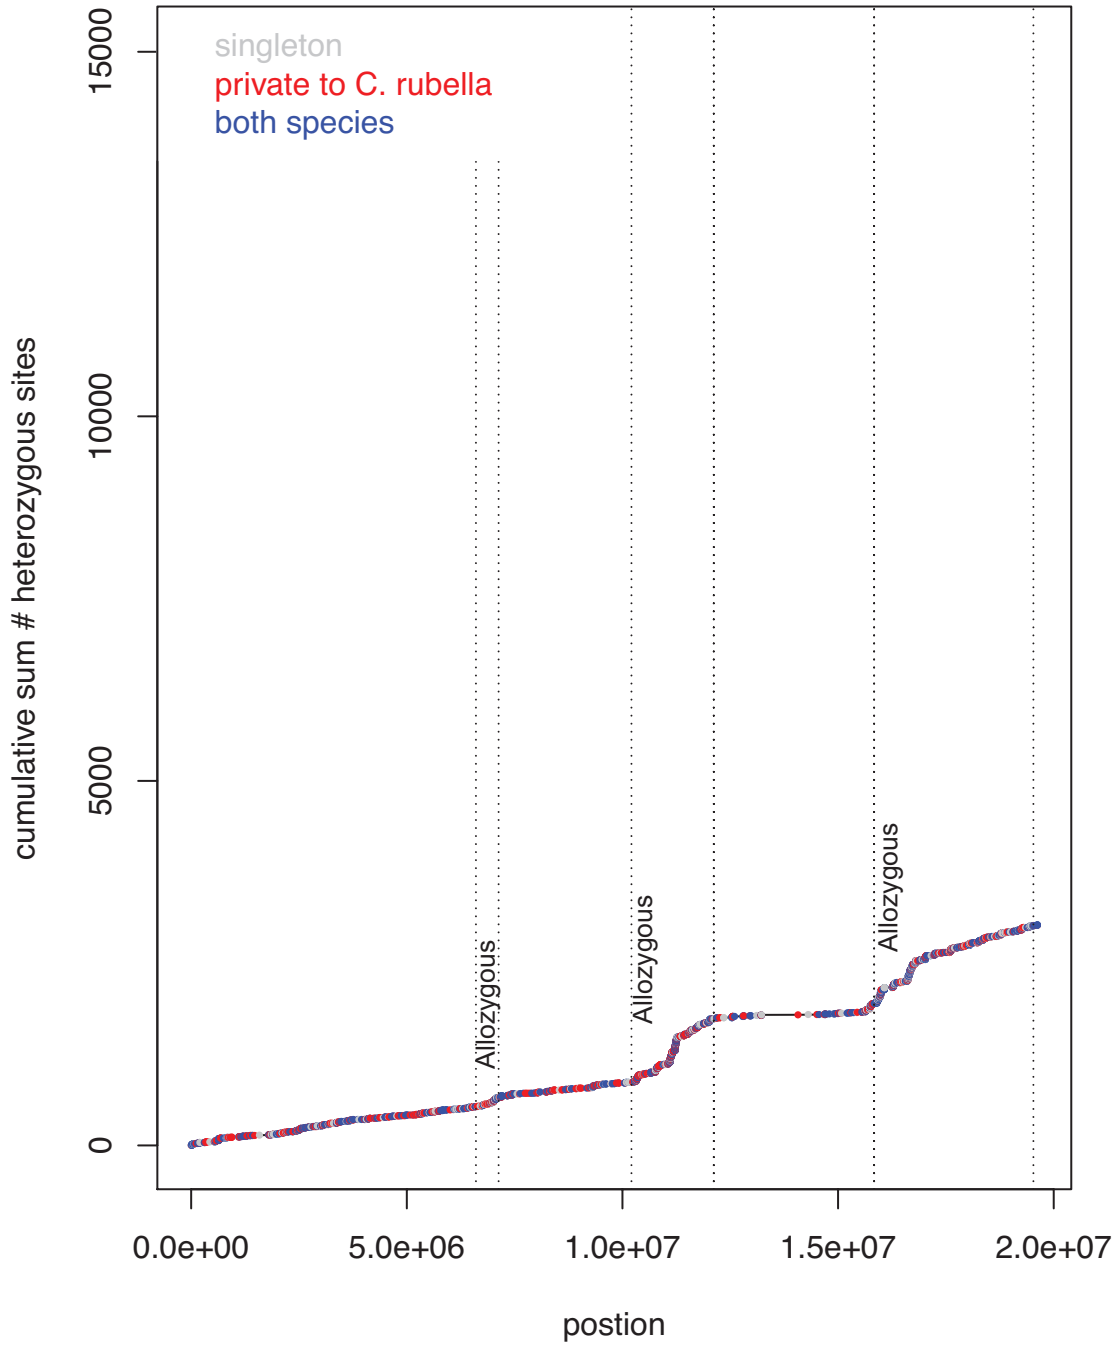

S9\_C.2)

Cr34 (Italian), Chromosome 2

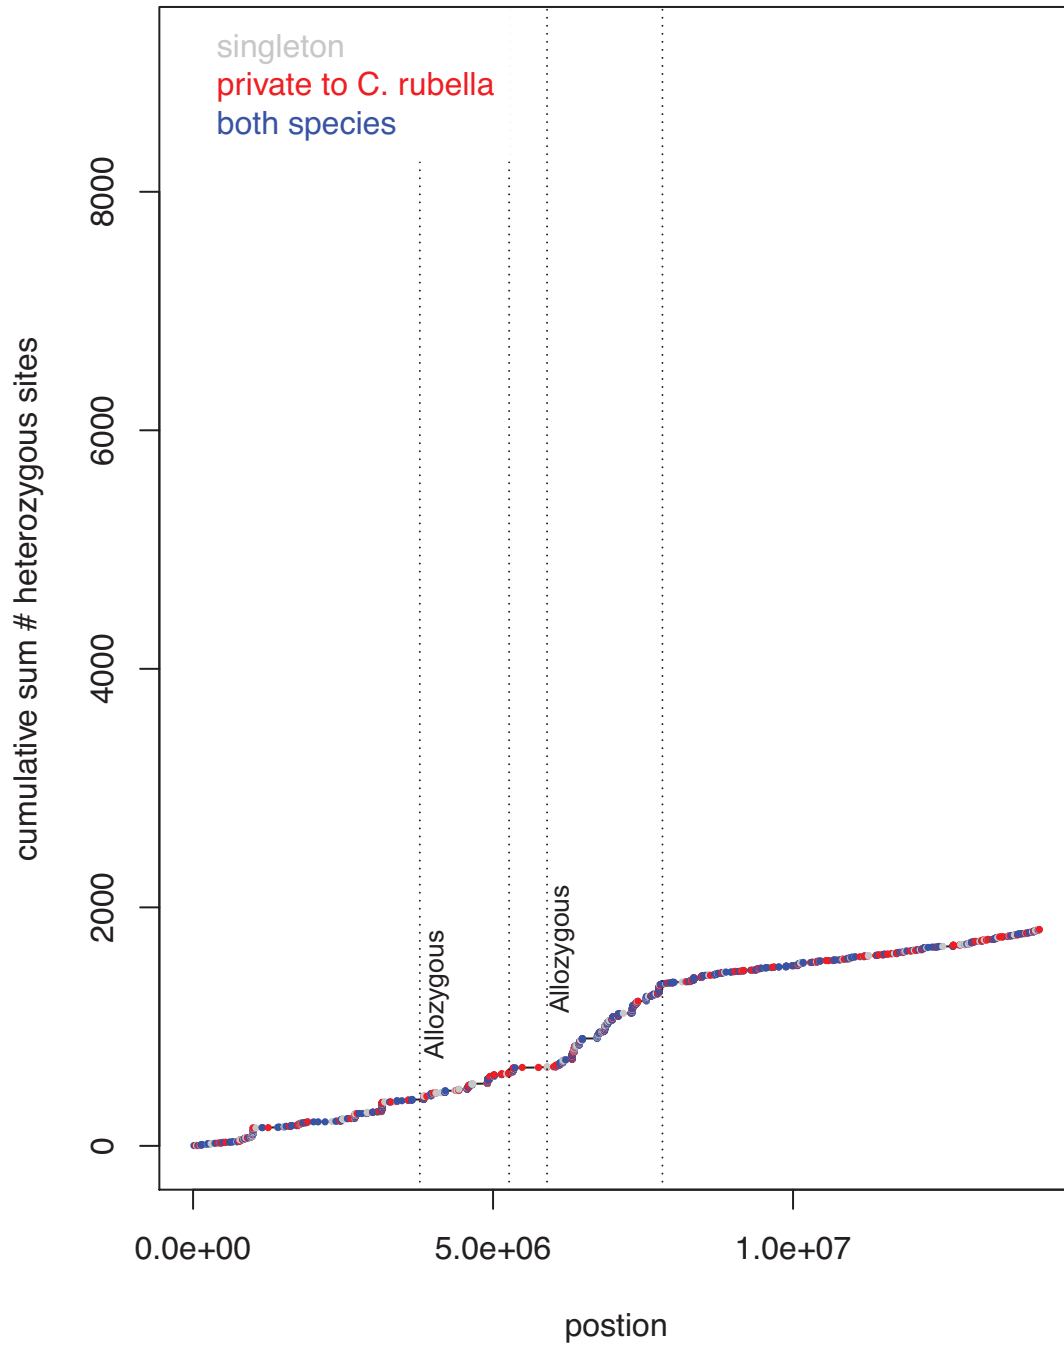

S9\_C.3)

Cr34 (Italian), Chromosome 3

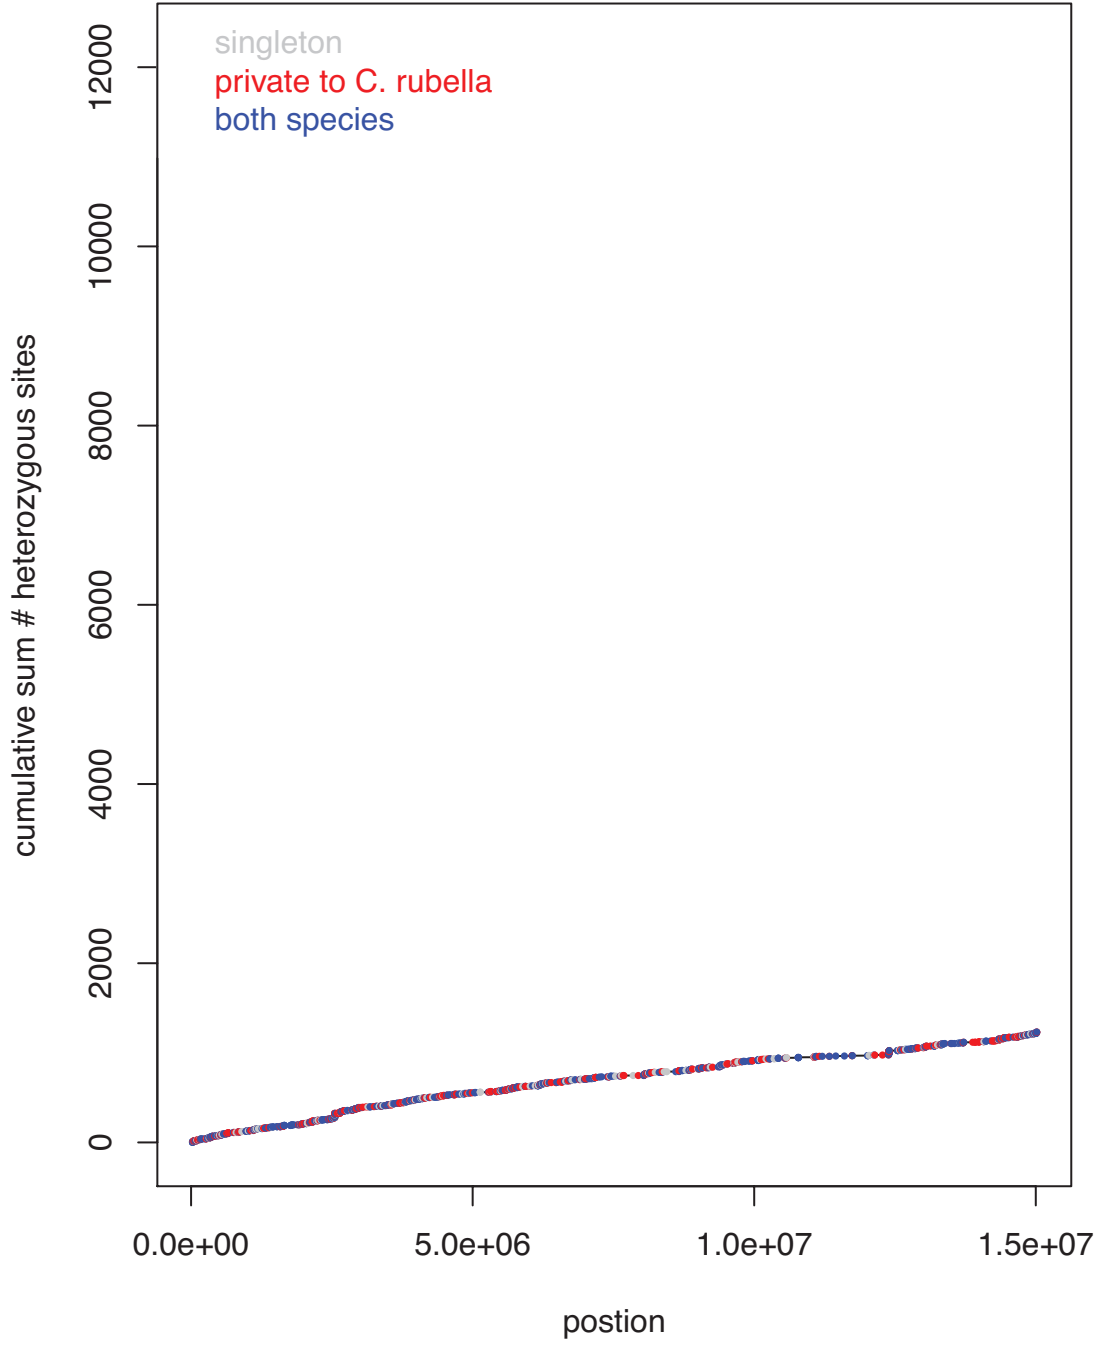

S9\_C.4)

Cr34 (Italian), Chromosome 4

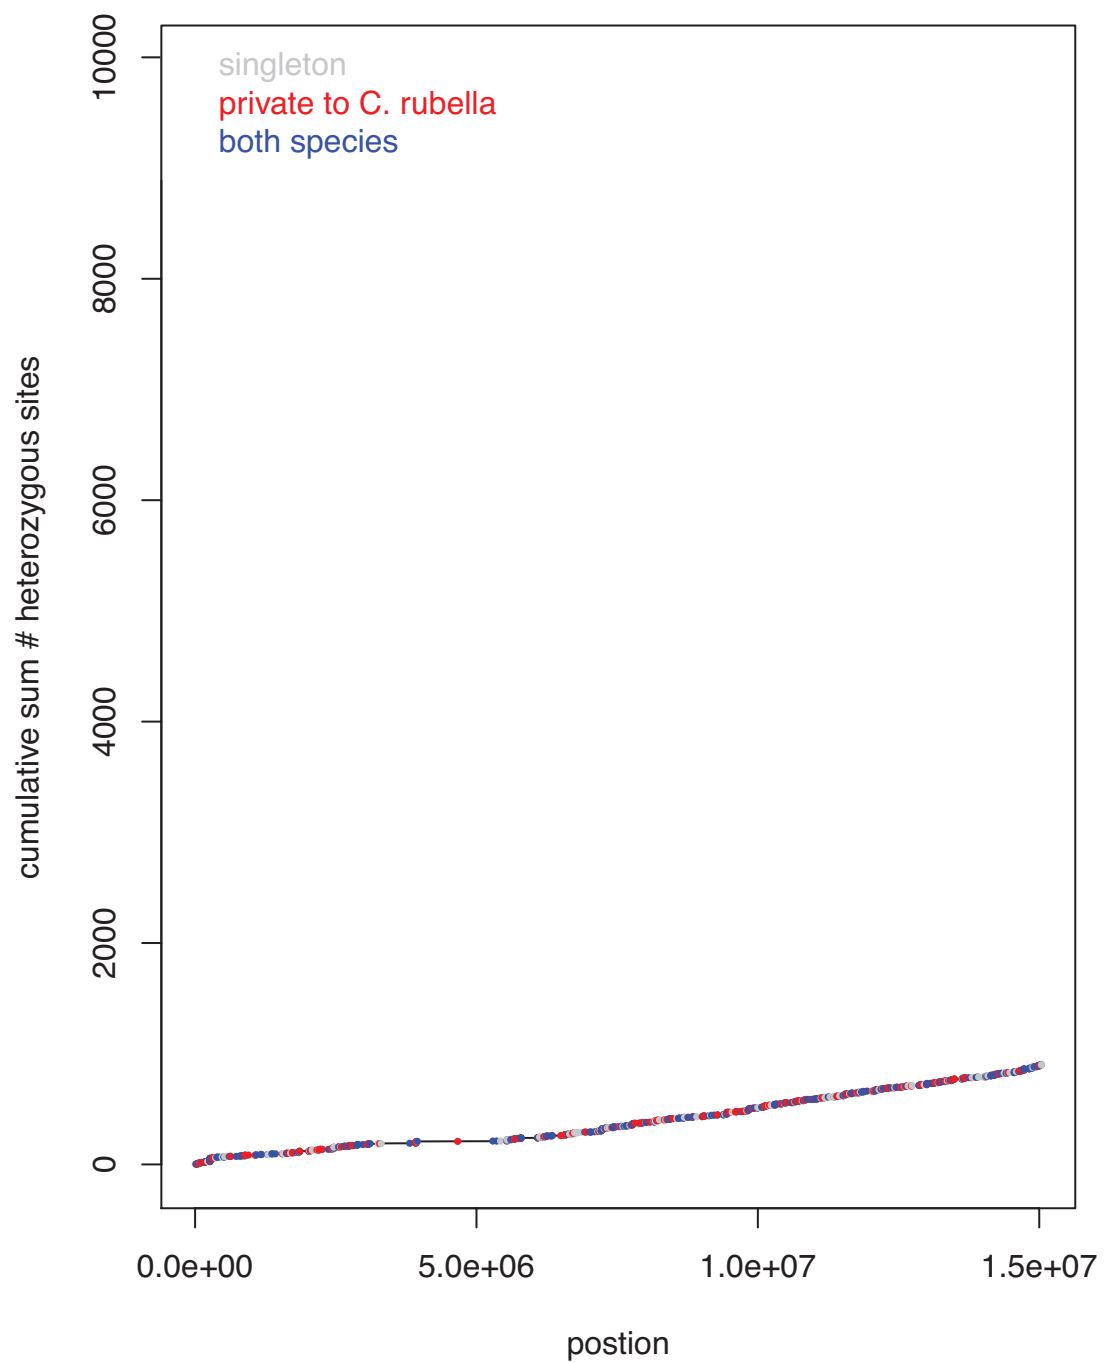

S9\_C.5)

Cr34 (Italian), Chromosome 5

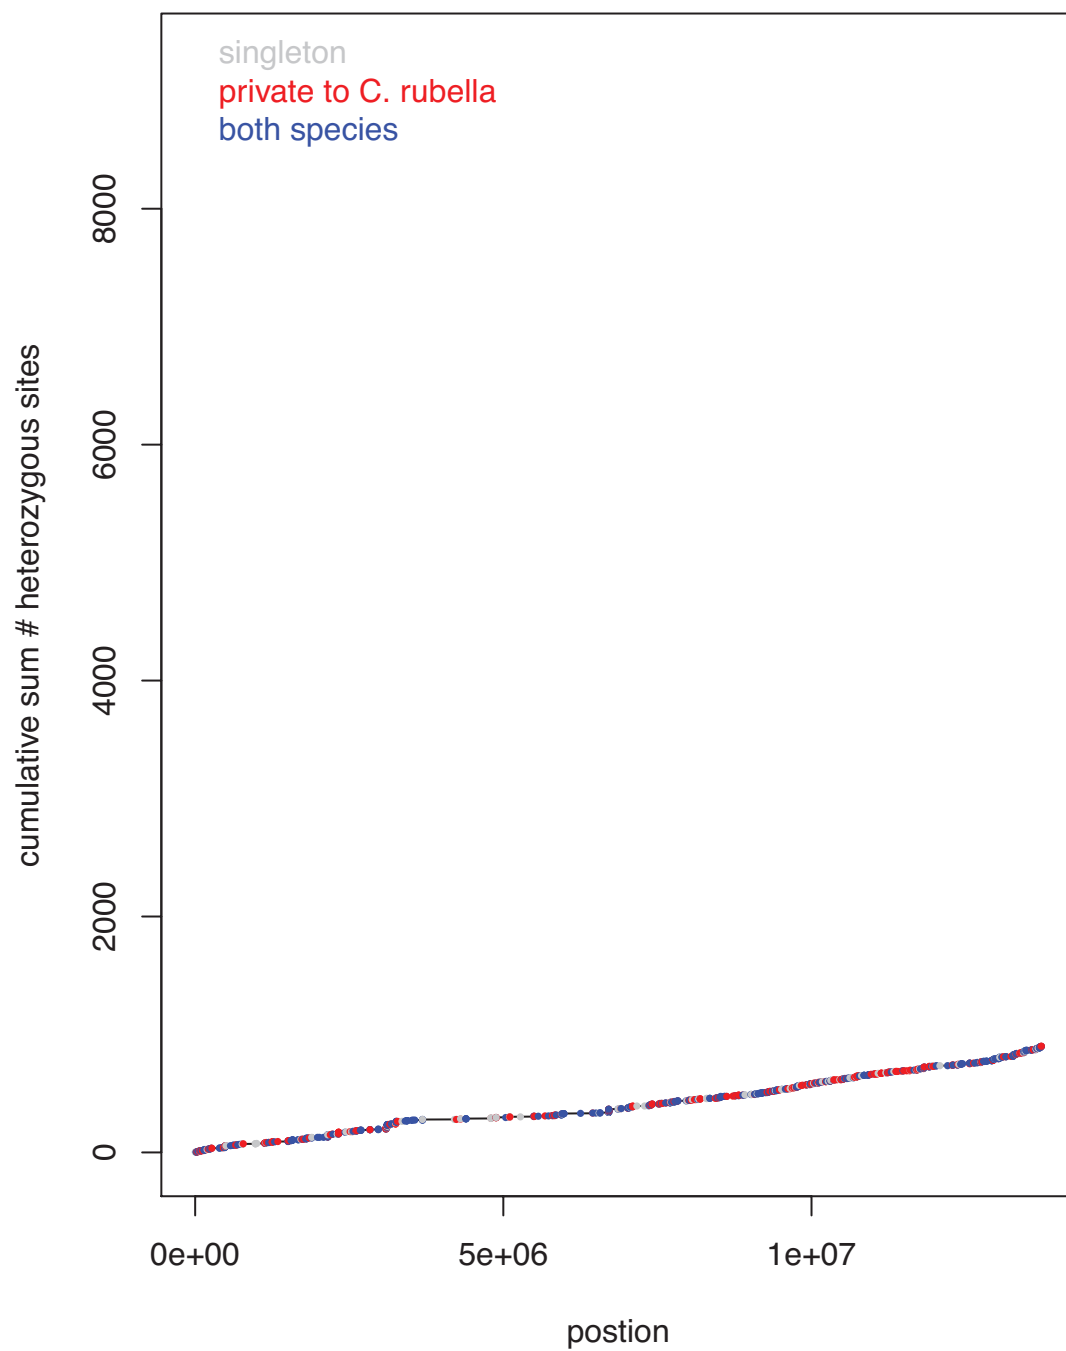

S9\_C.6)

Cr34 (Italian), Chromosome 6

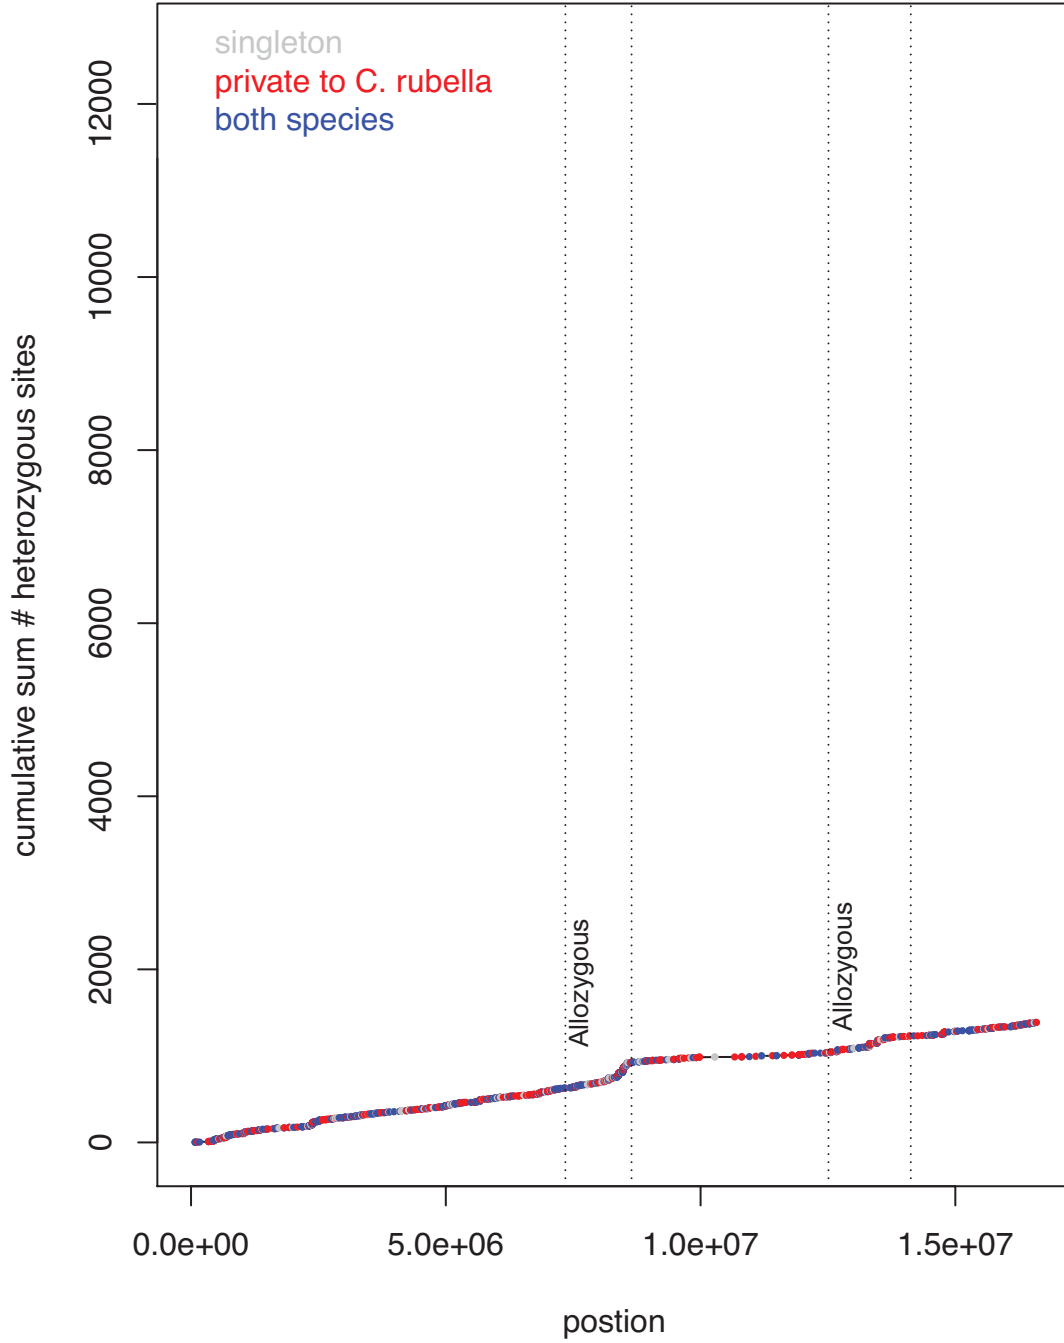

S9\_C.7)

Cr34 (Italian), Chromosome 7

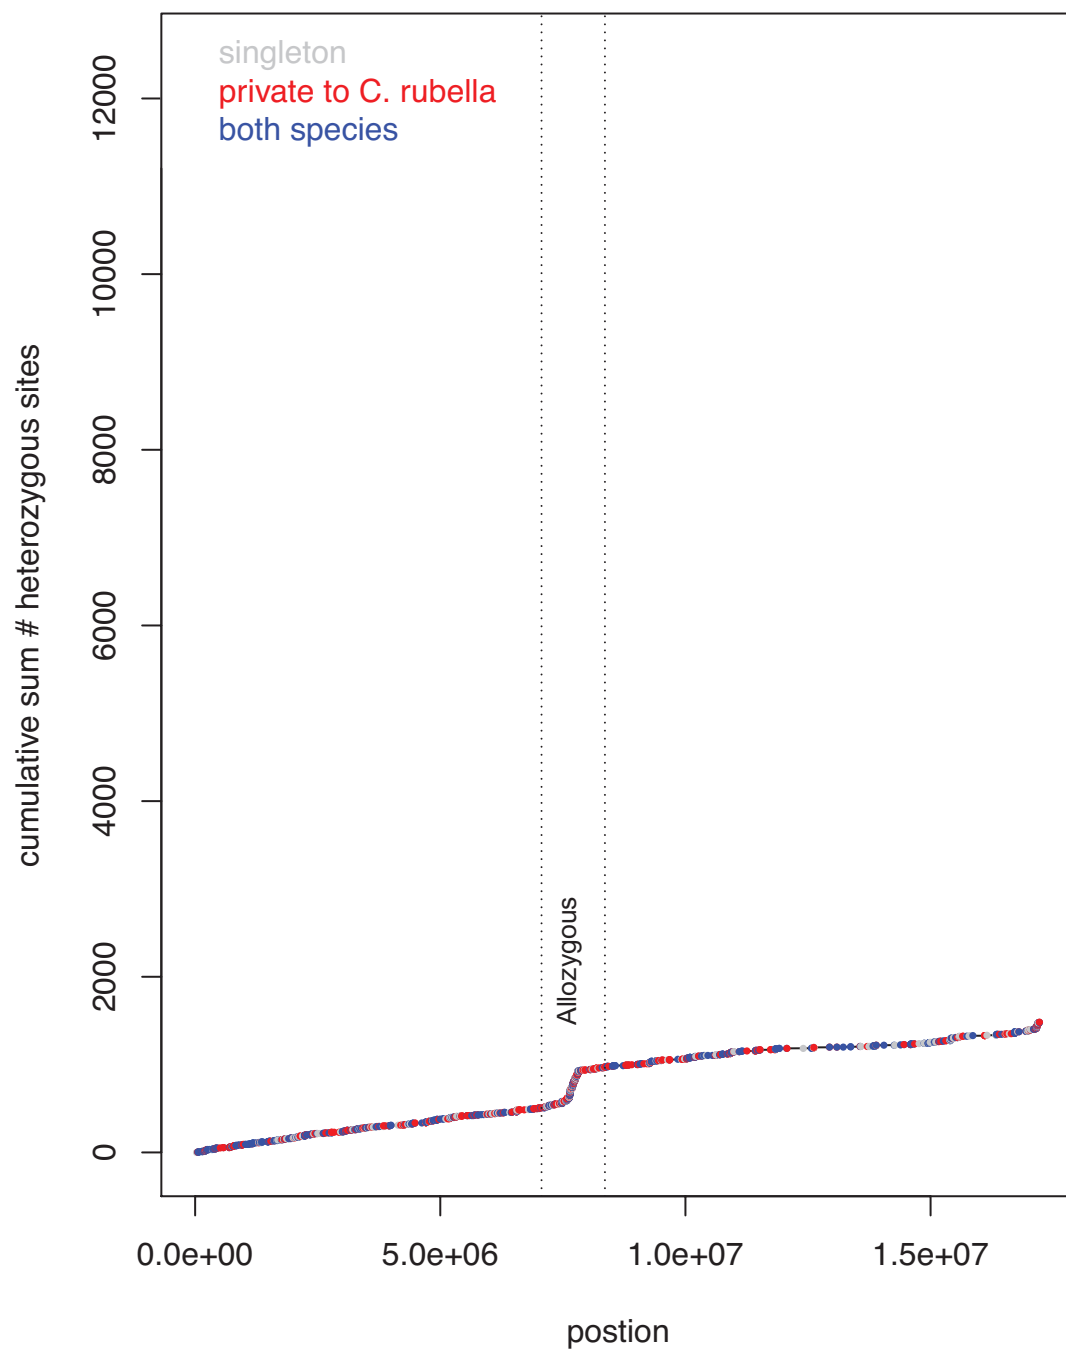

S9\_C.8)

Cr34 (Italian), Chromosome 8

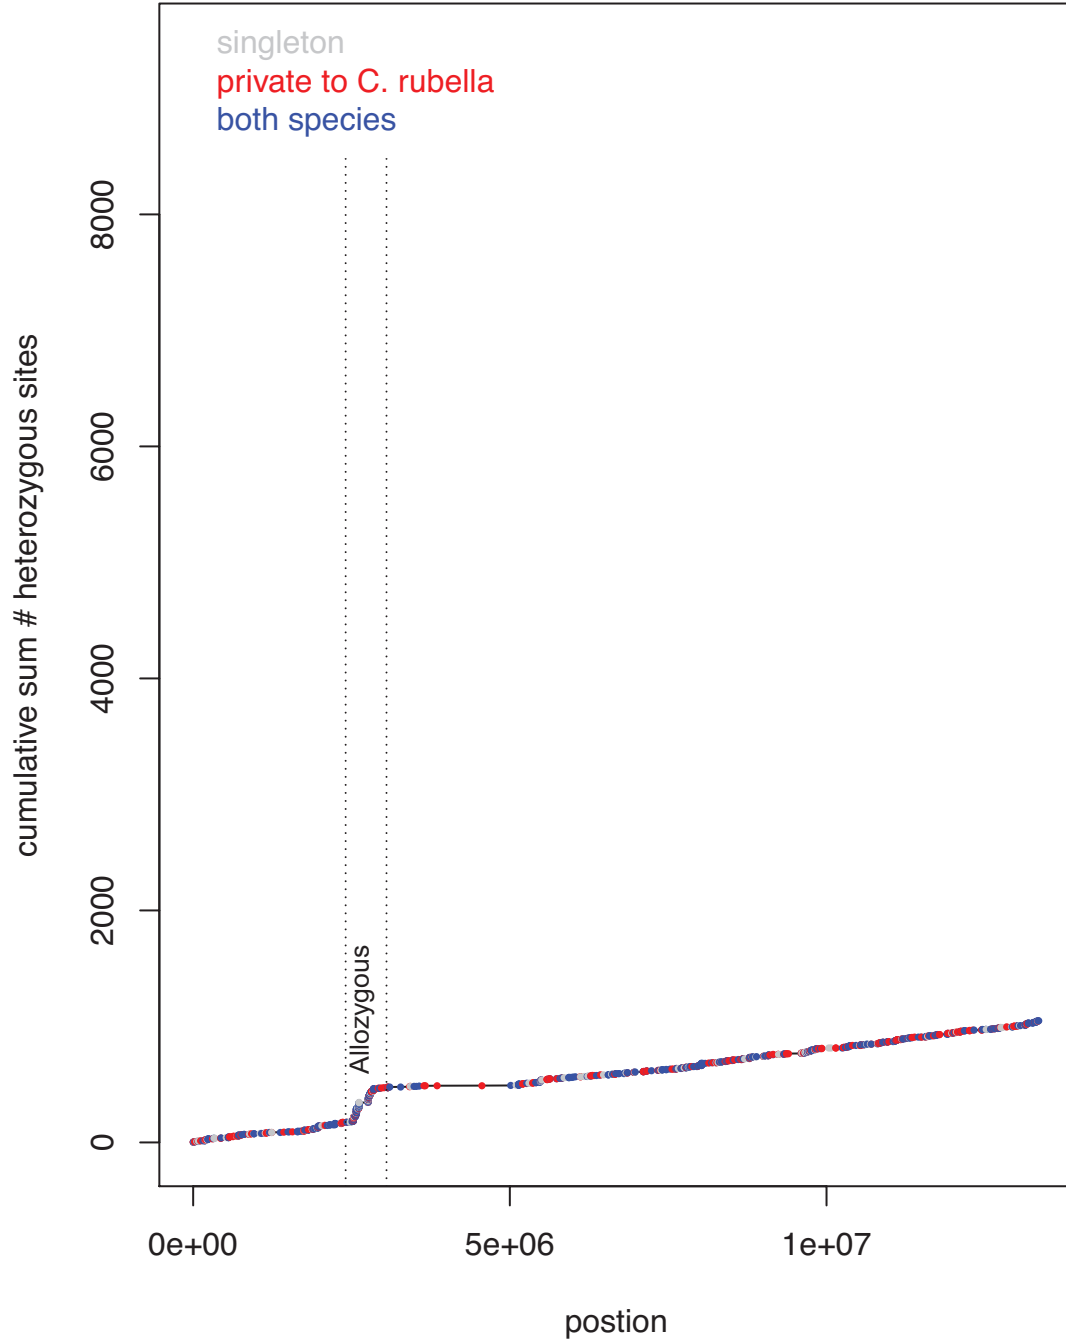



S9\_D.1)

Cr75 (Greek), Chromosome 1

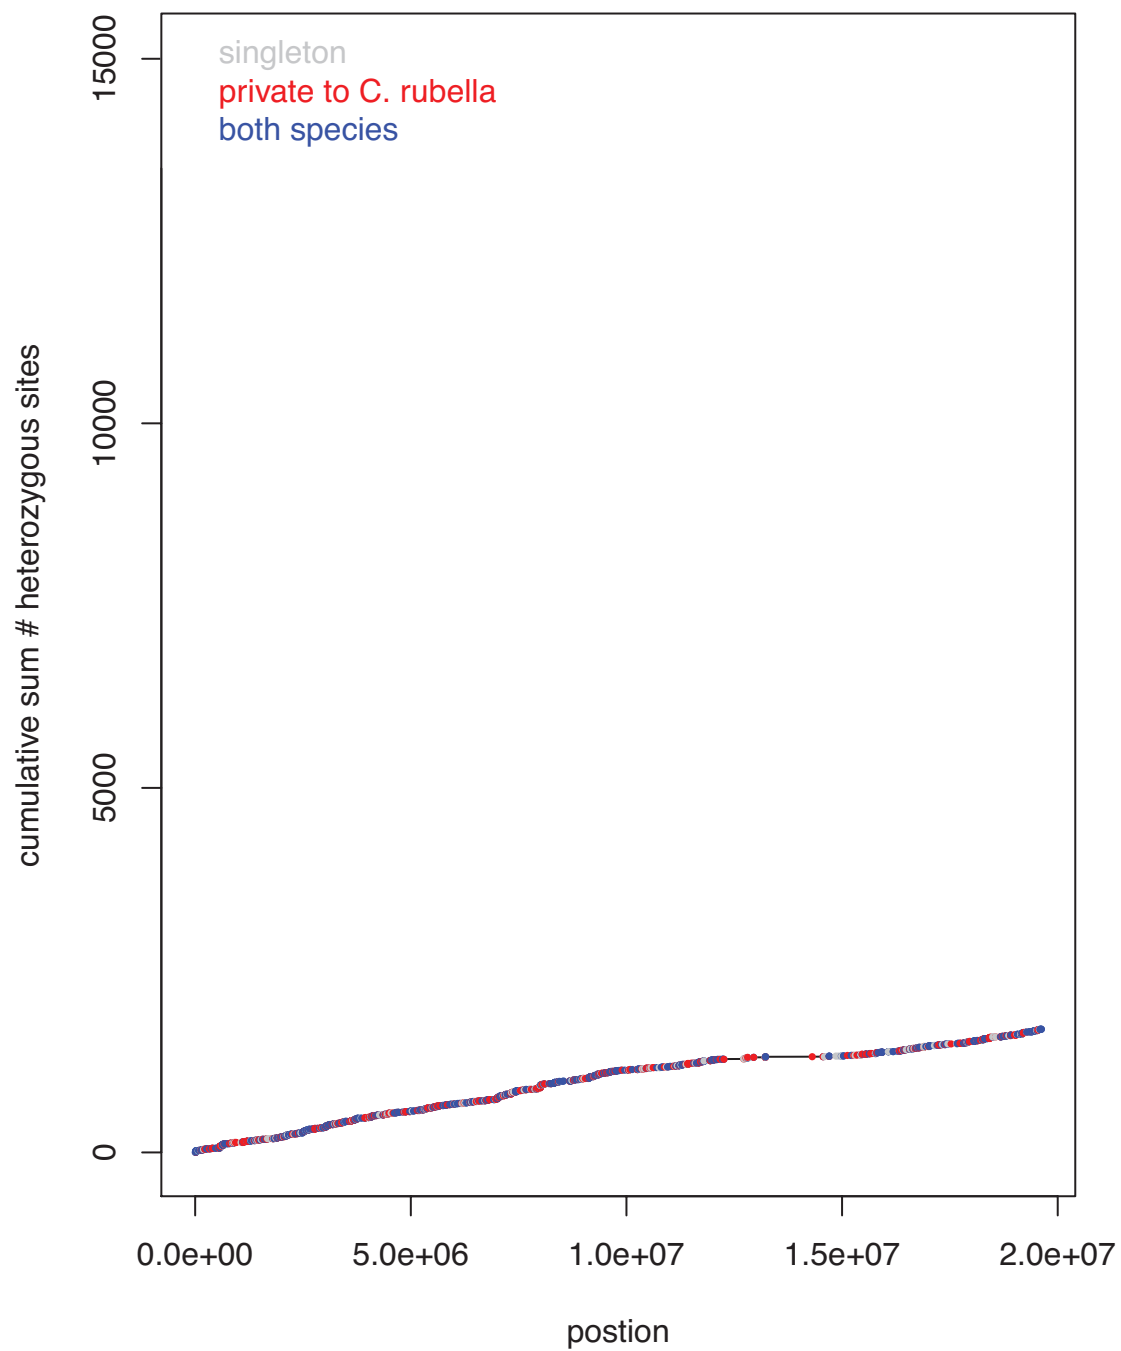

S9\_D.2)

Cr75 (Greek), Chromosome 2

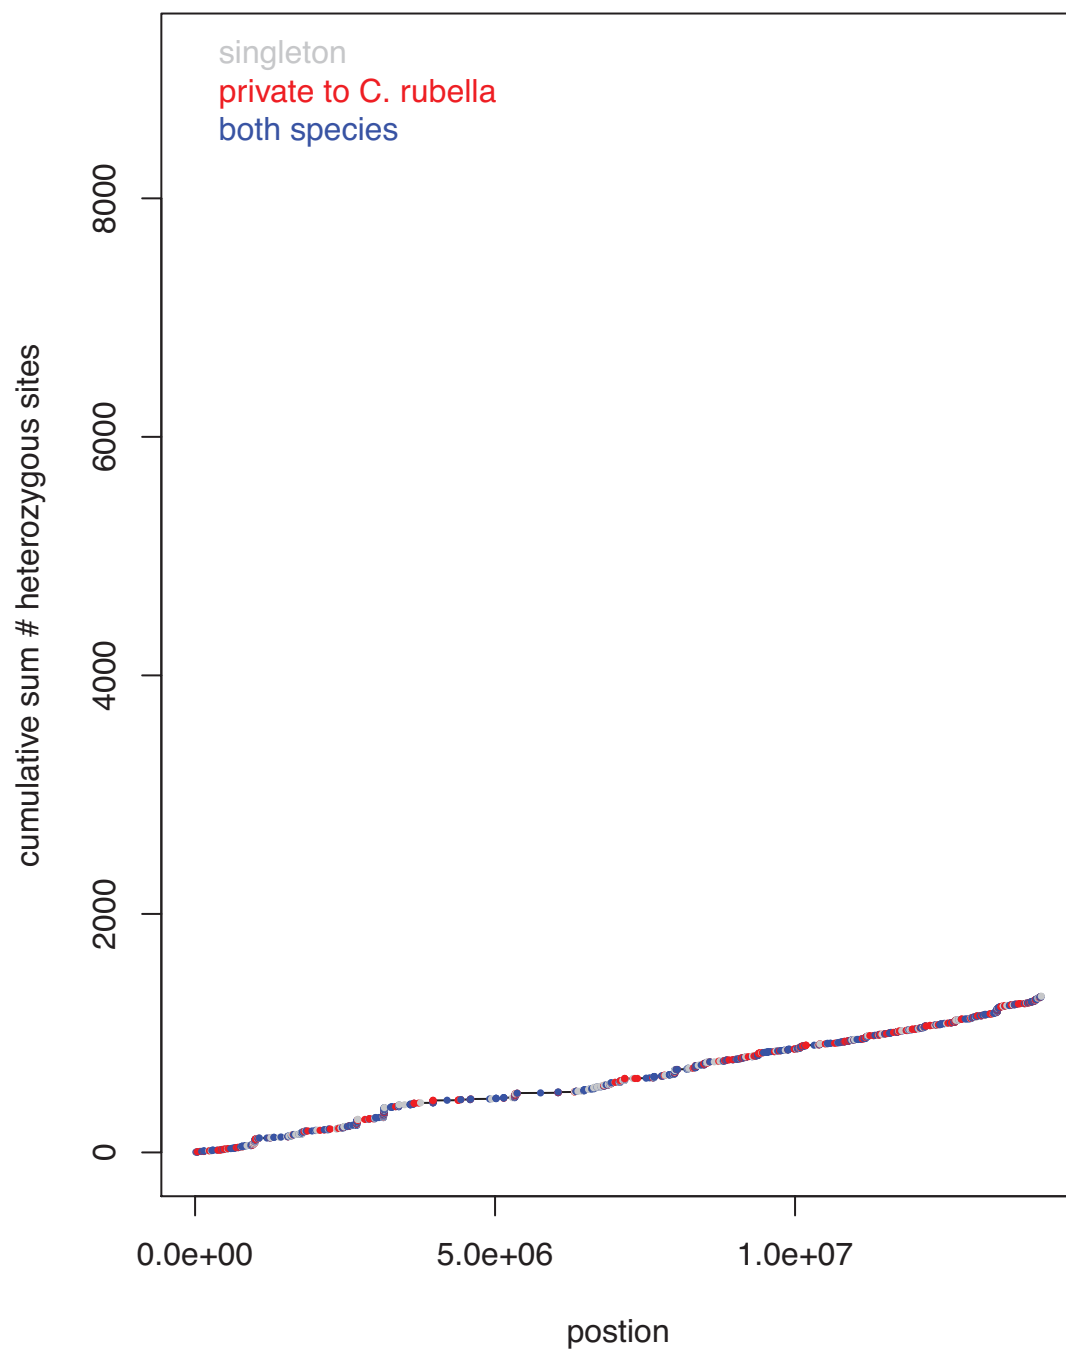

S9\_D.3)

Cr75 (Greek), Chromosome 3

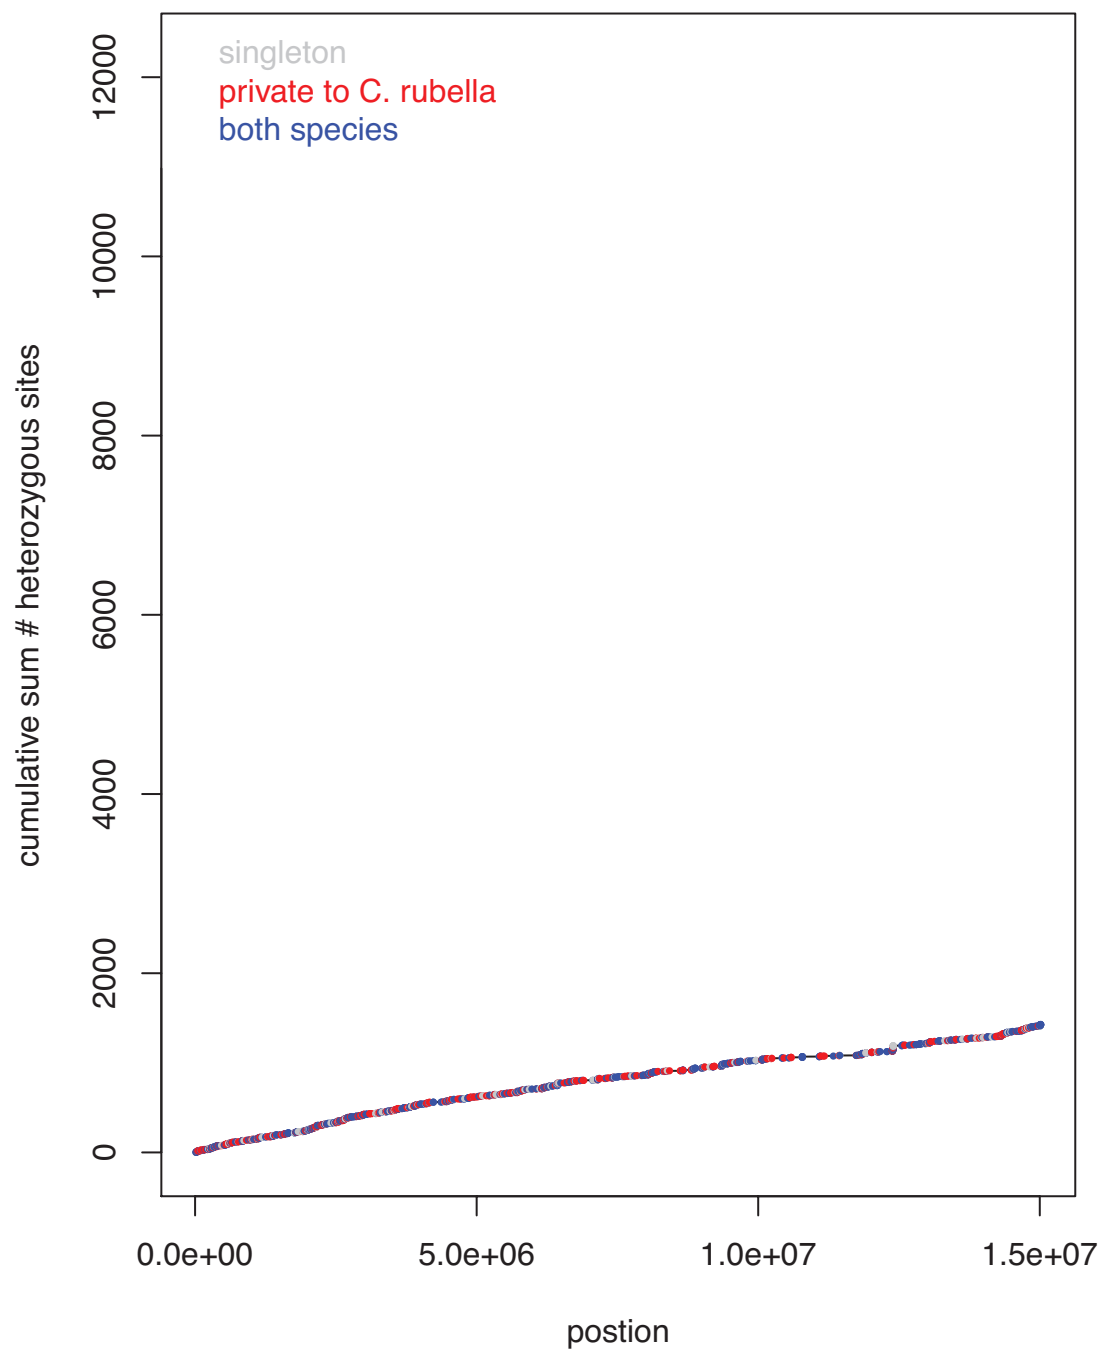

S9\_D.4)

Cr75 (Greek), Chromosome 4

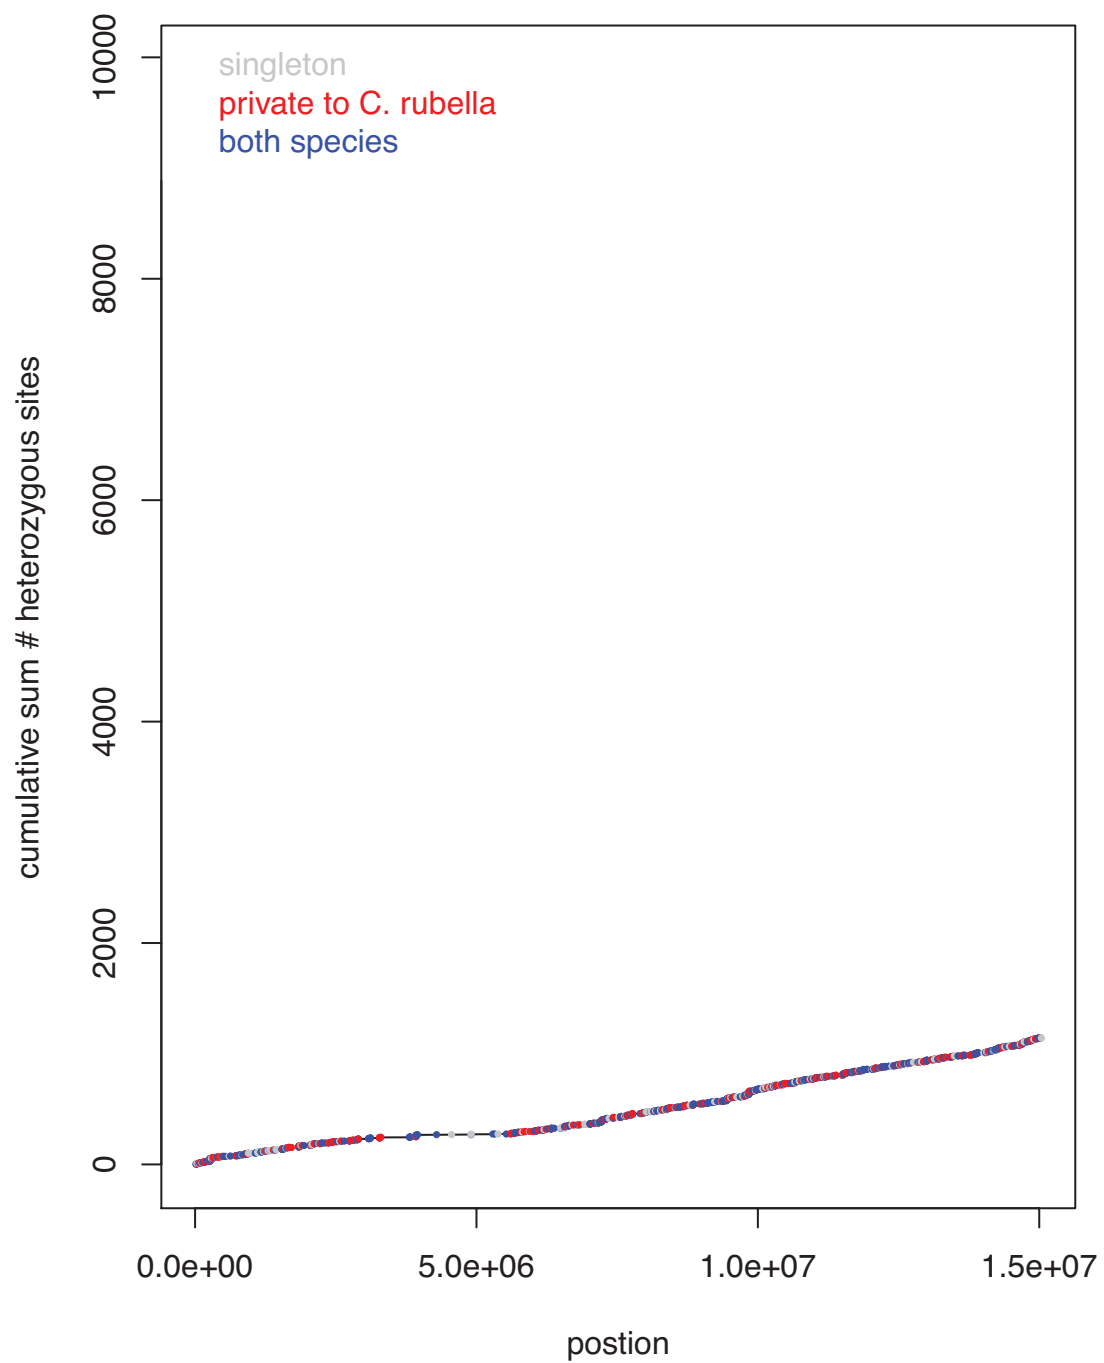

S9\_D.5)

Cr75 (Greek), Chromosome 5

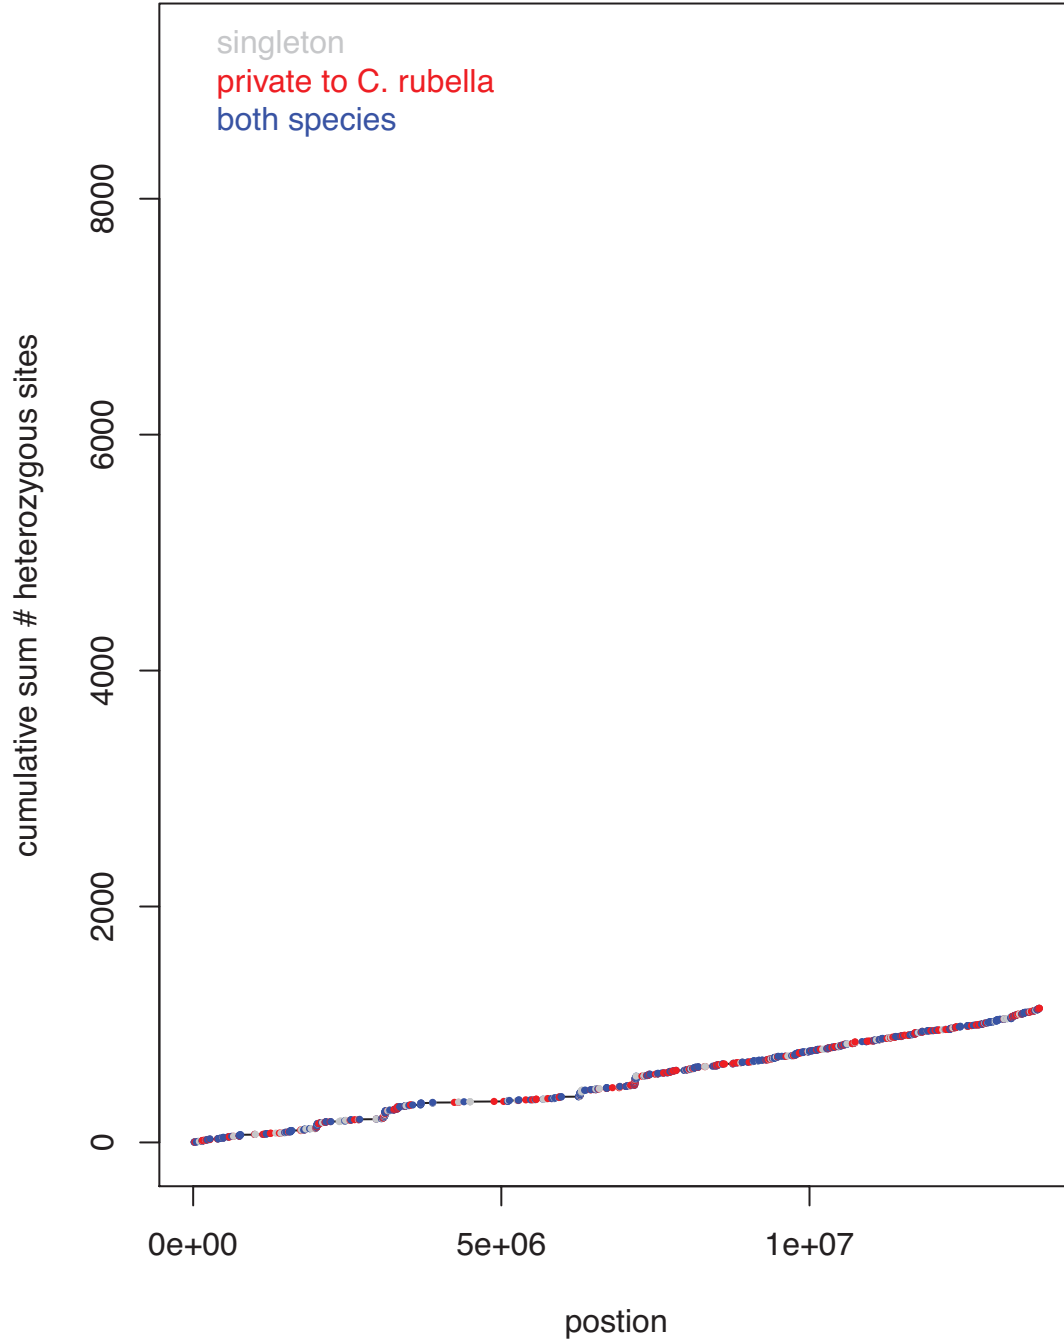

S9\_D.6)

Cr75 (Greek), Chromosome 6

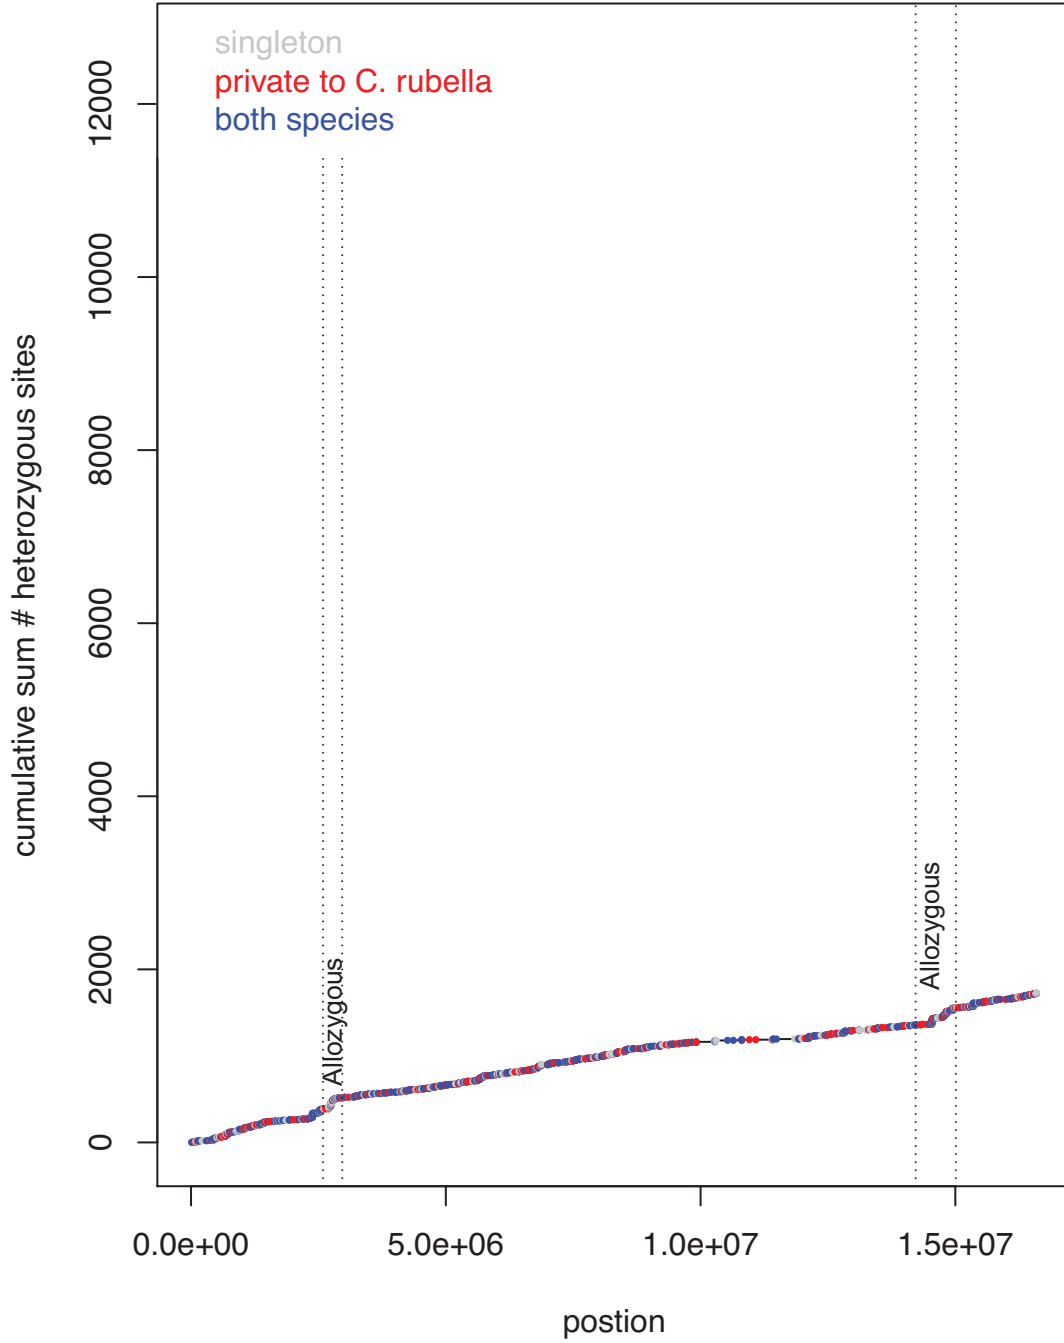

S9\_D.7)

Cr75 (Greek), Chromosome 7

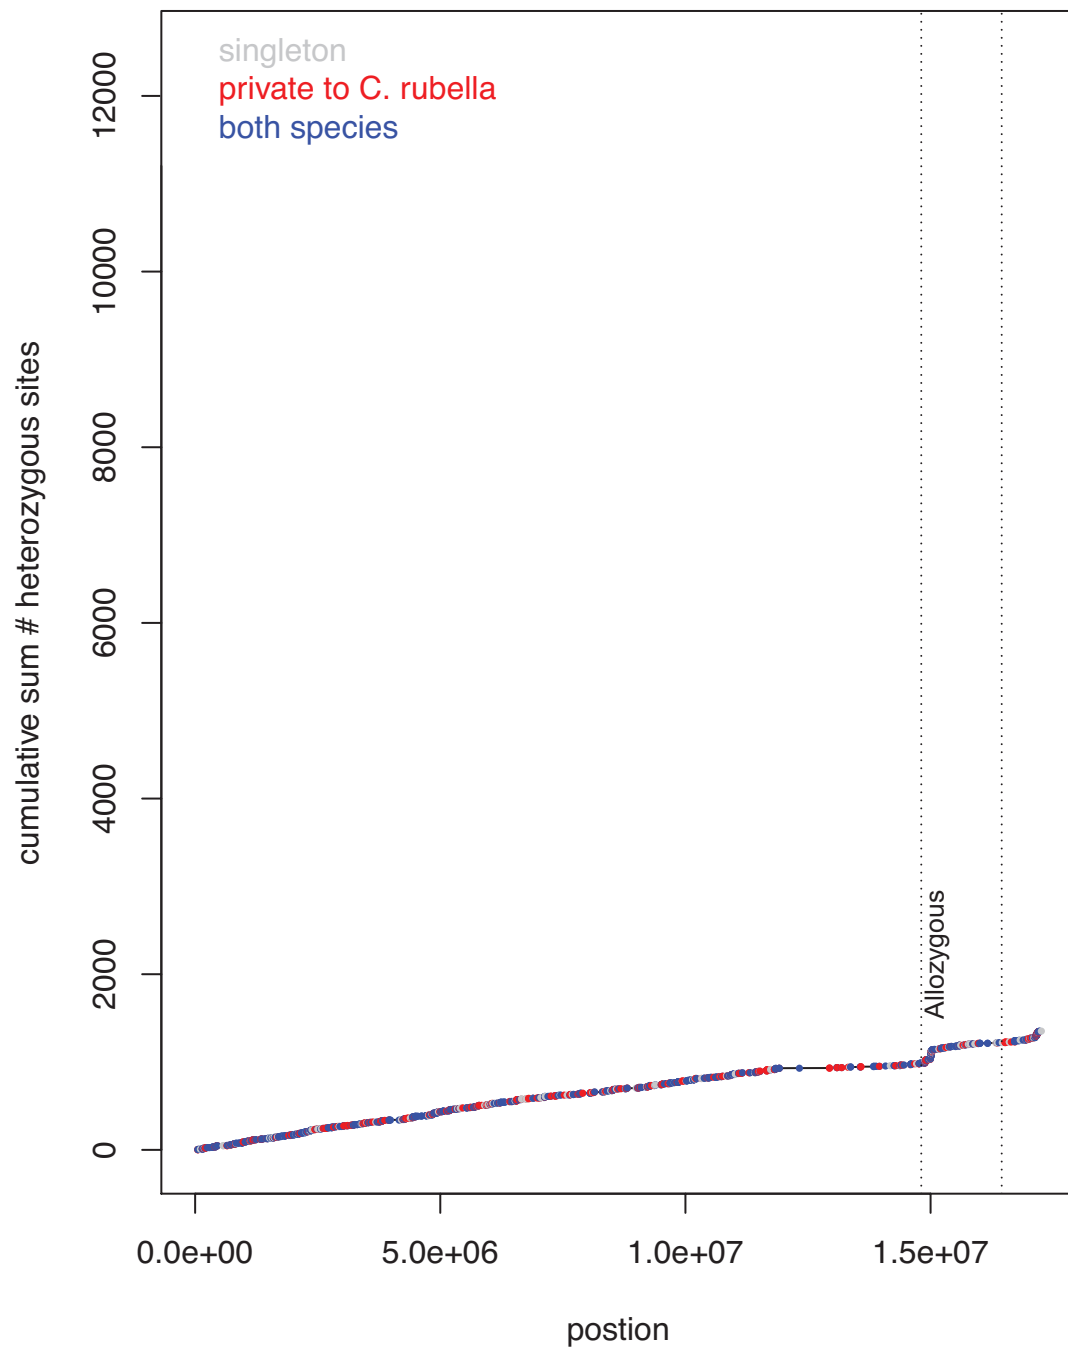

S9\_D.8)

Cr75 (Greek), Chromosome 8

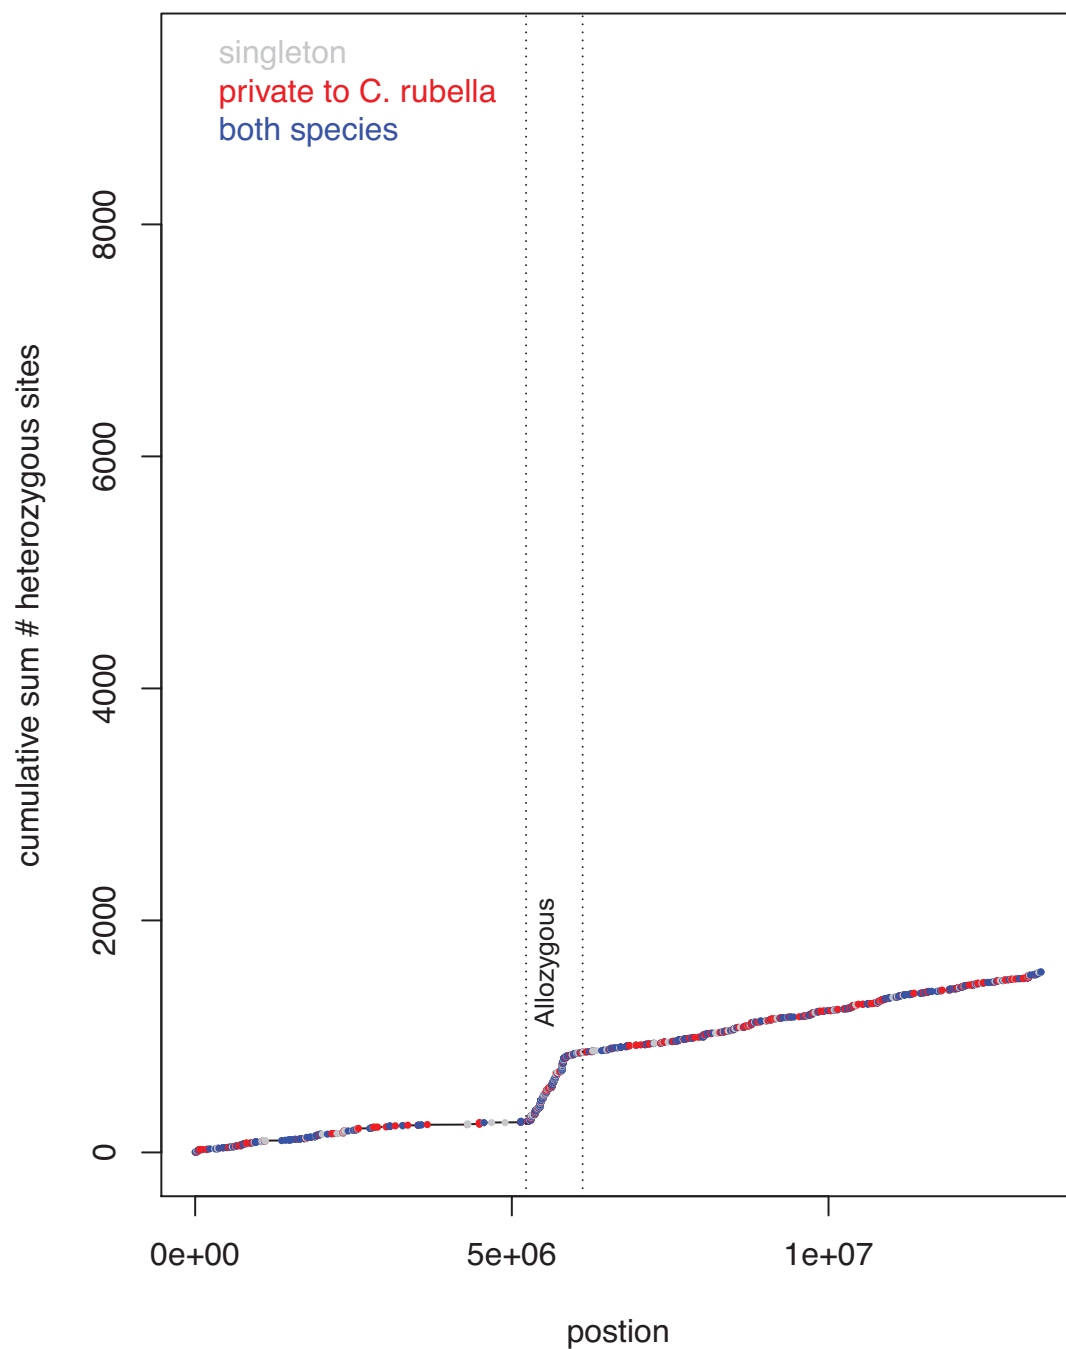



### S9\_E.1) Cr1337 (Argentinian), Chromosome 1

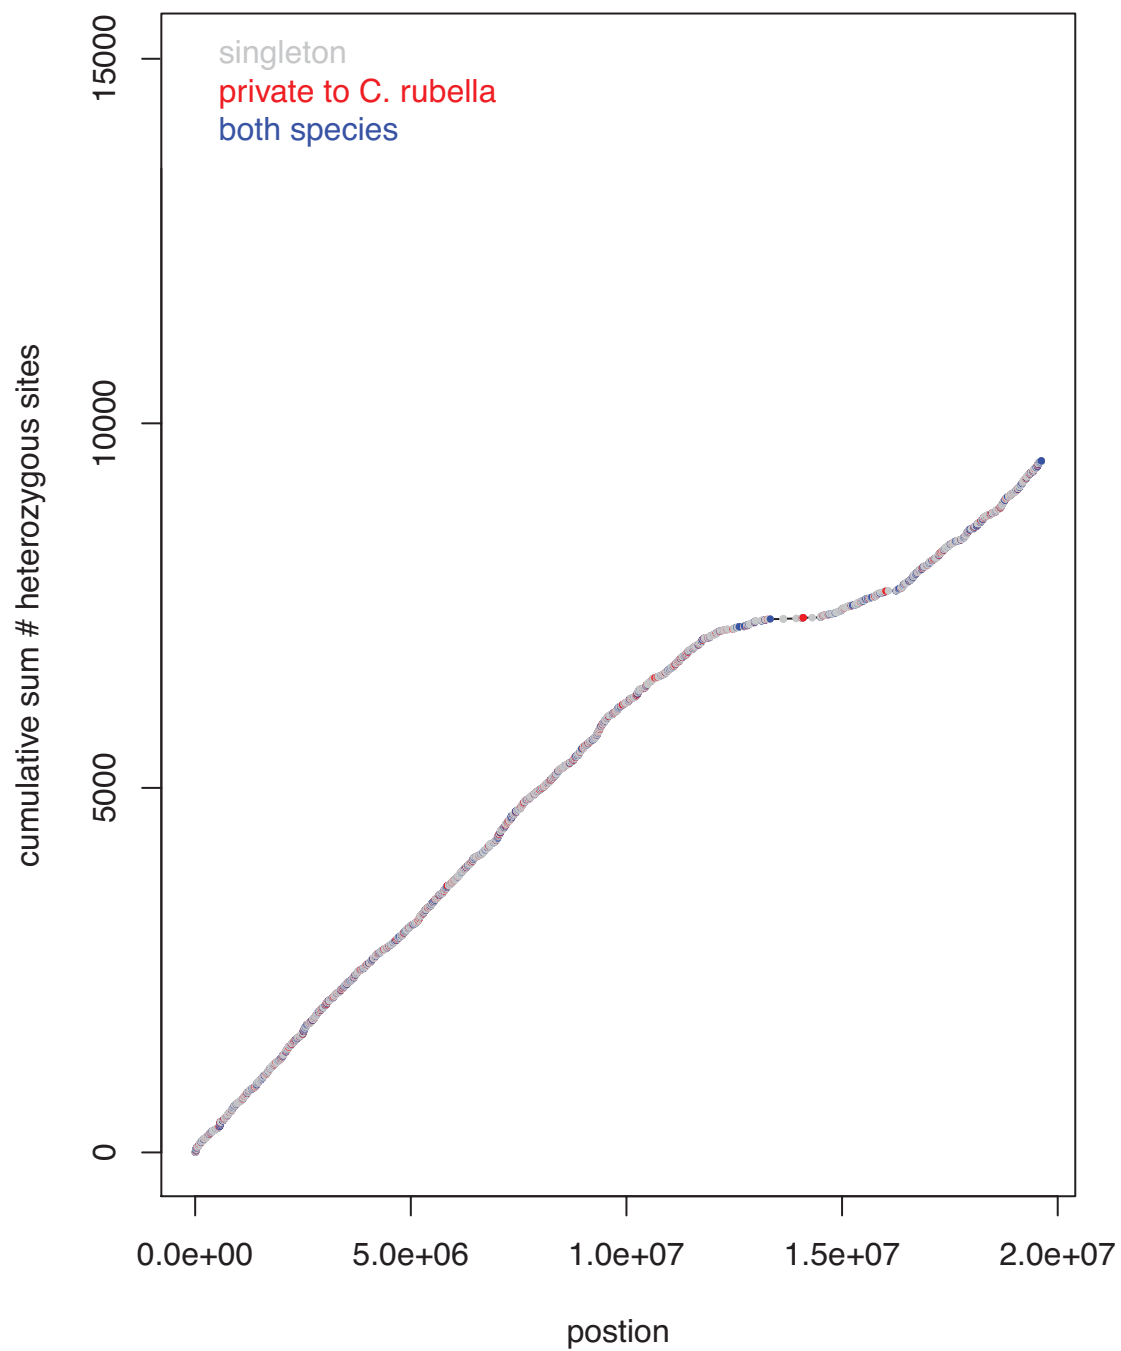

S9\_E.2) Cr1337 (Argentinian), Chromosome 2

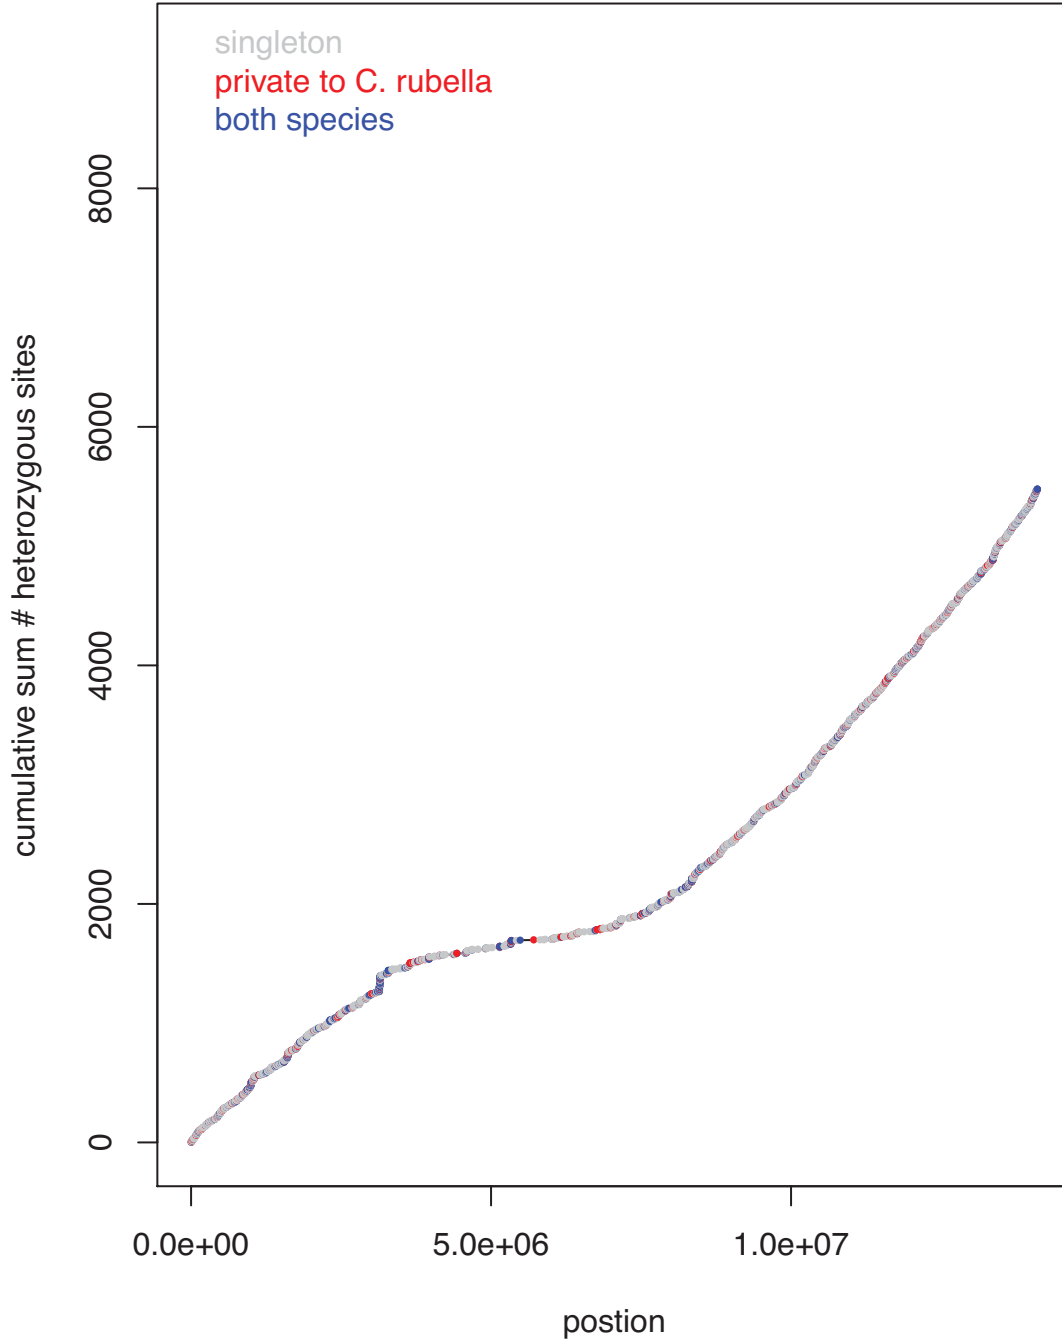

### S9\_E.3) Cr1337 (Argentinian), Chromosome 3

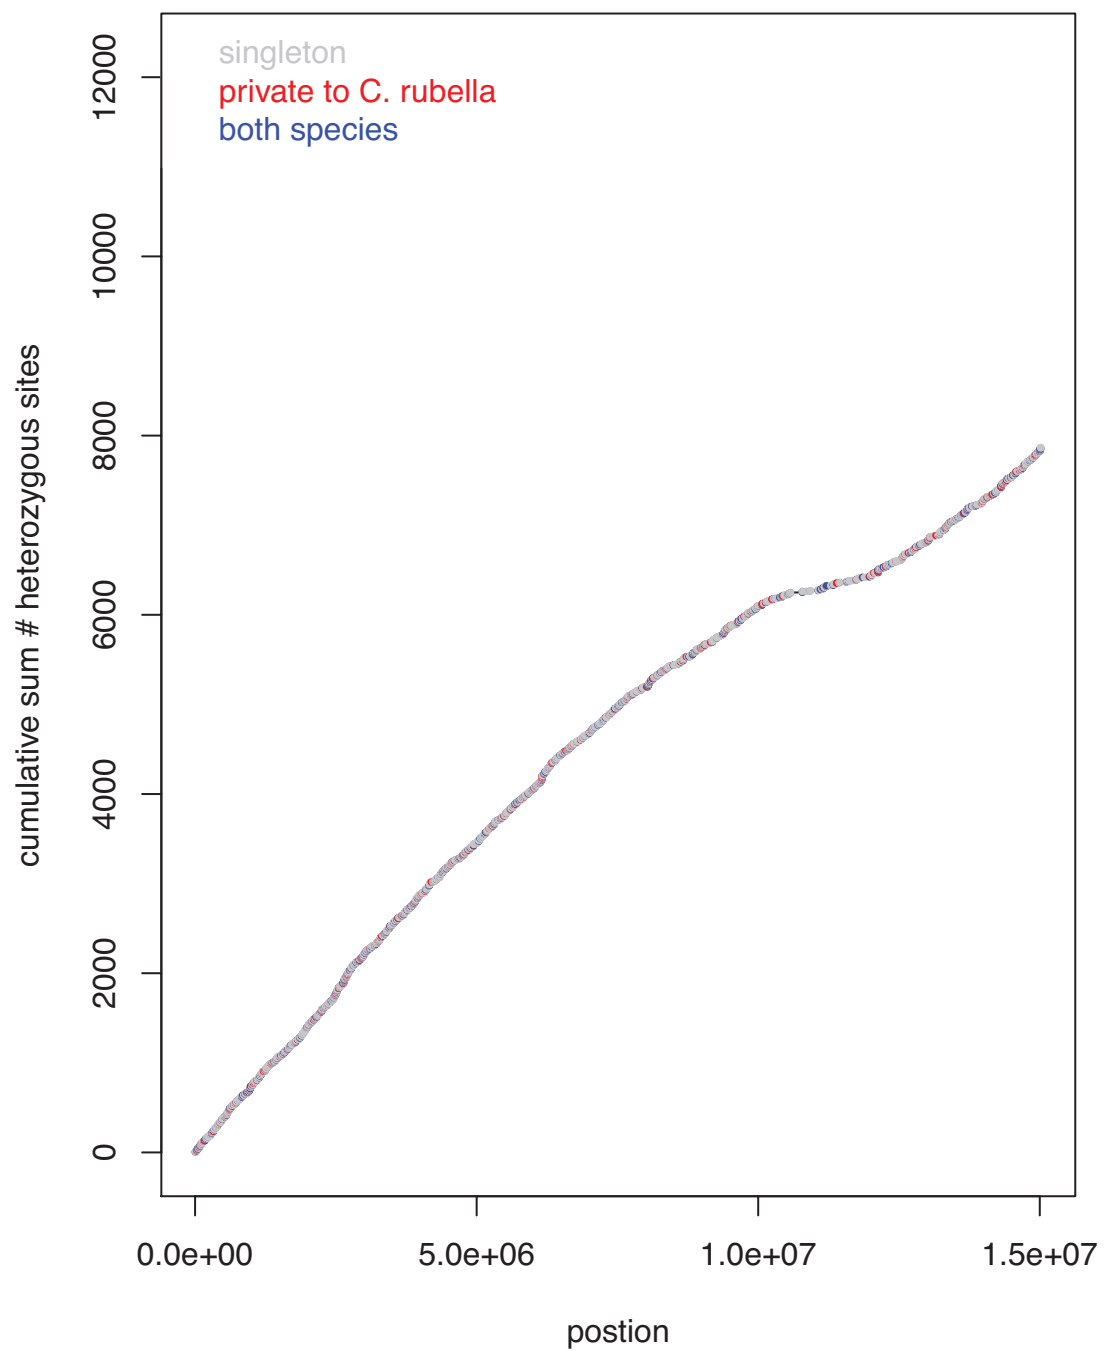

S9\_E.4) Cr1337 (Argentinian), Chromosome 4

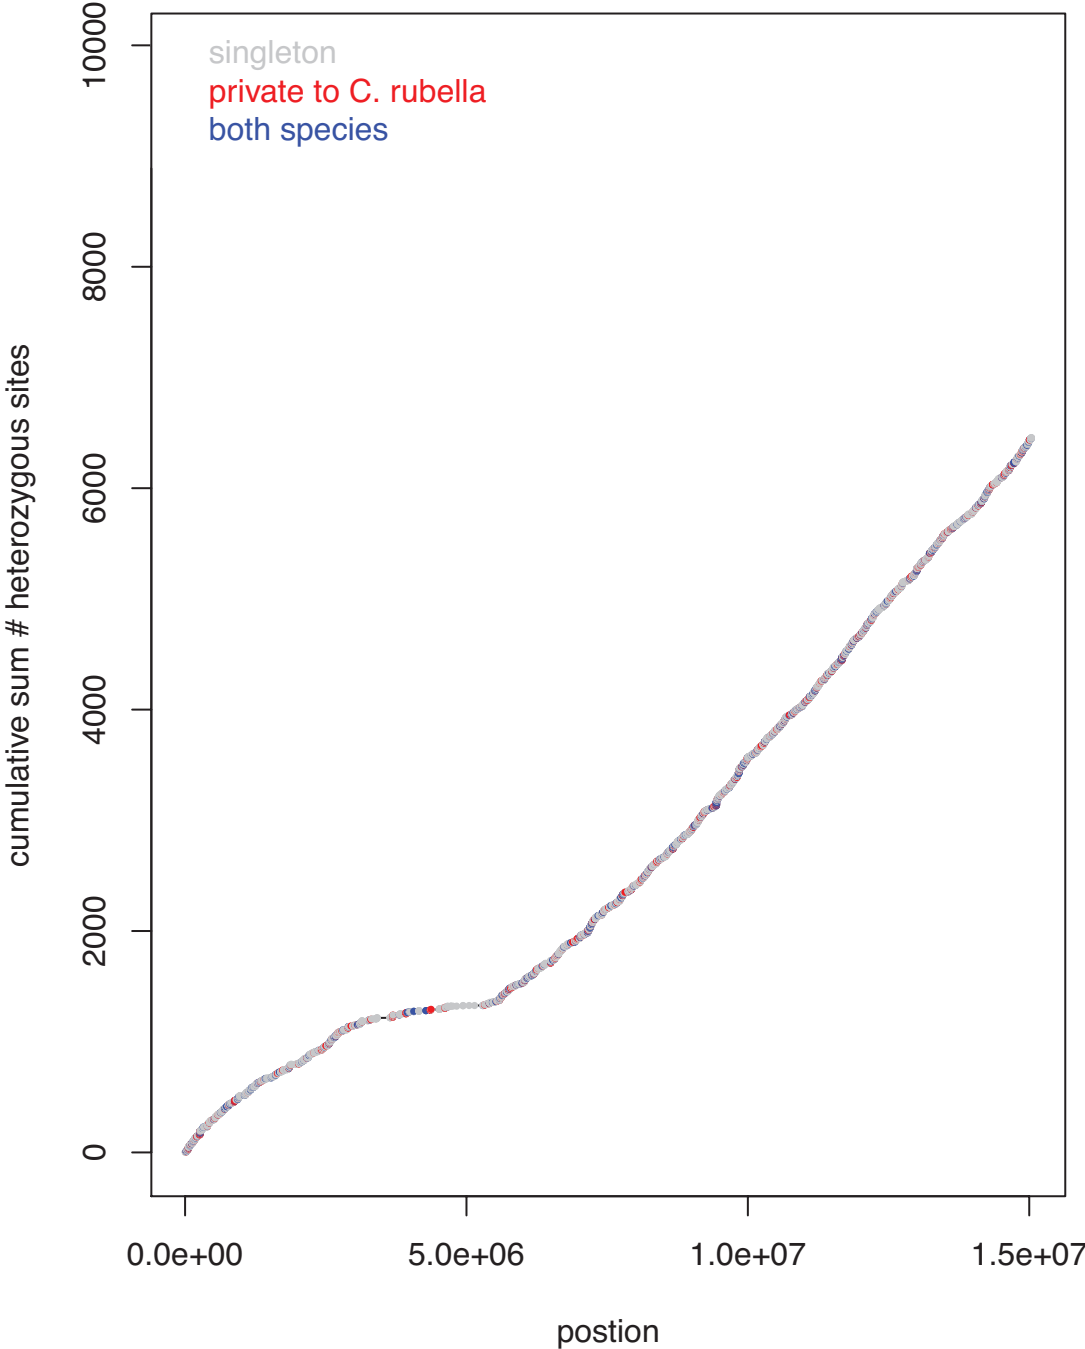

### S9\_E.5) Cr1337 (Argentinian), Chromosome 5

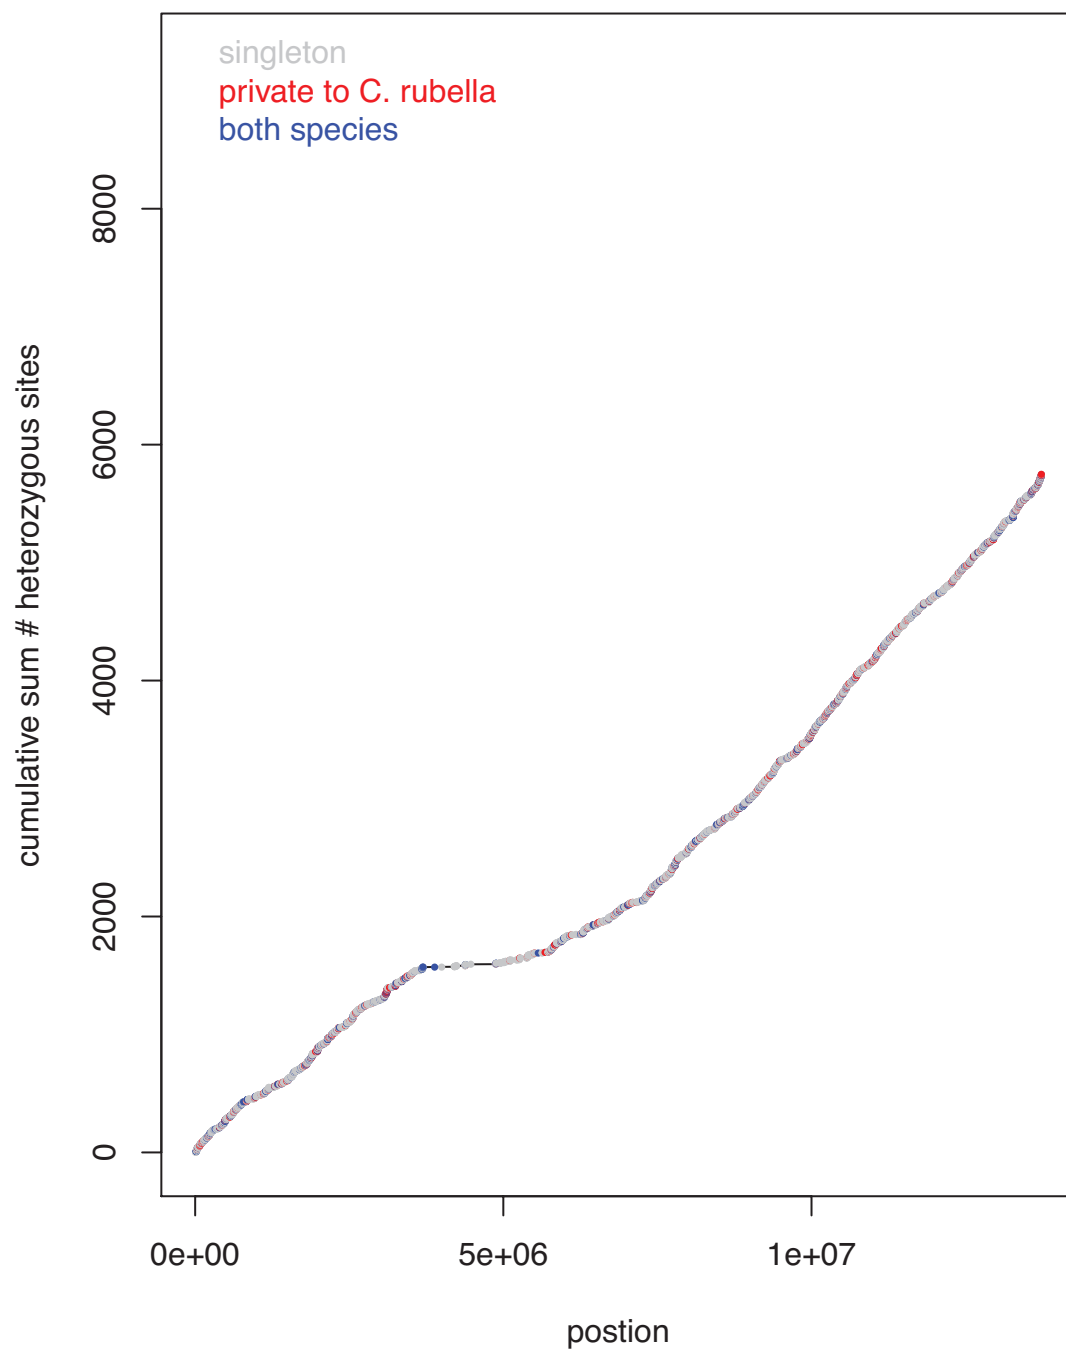

S9\_E.6) Cr1337 (Argentinian), Chromosome 6

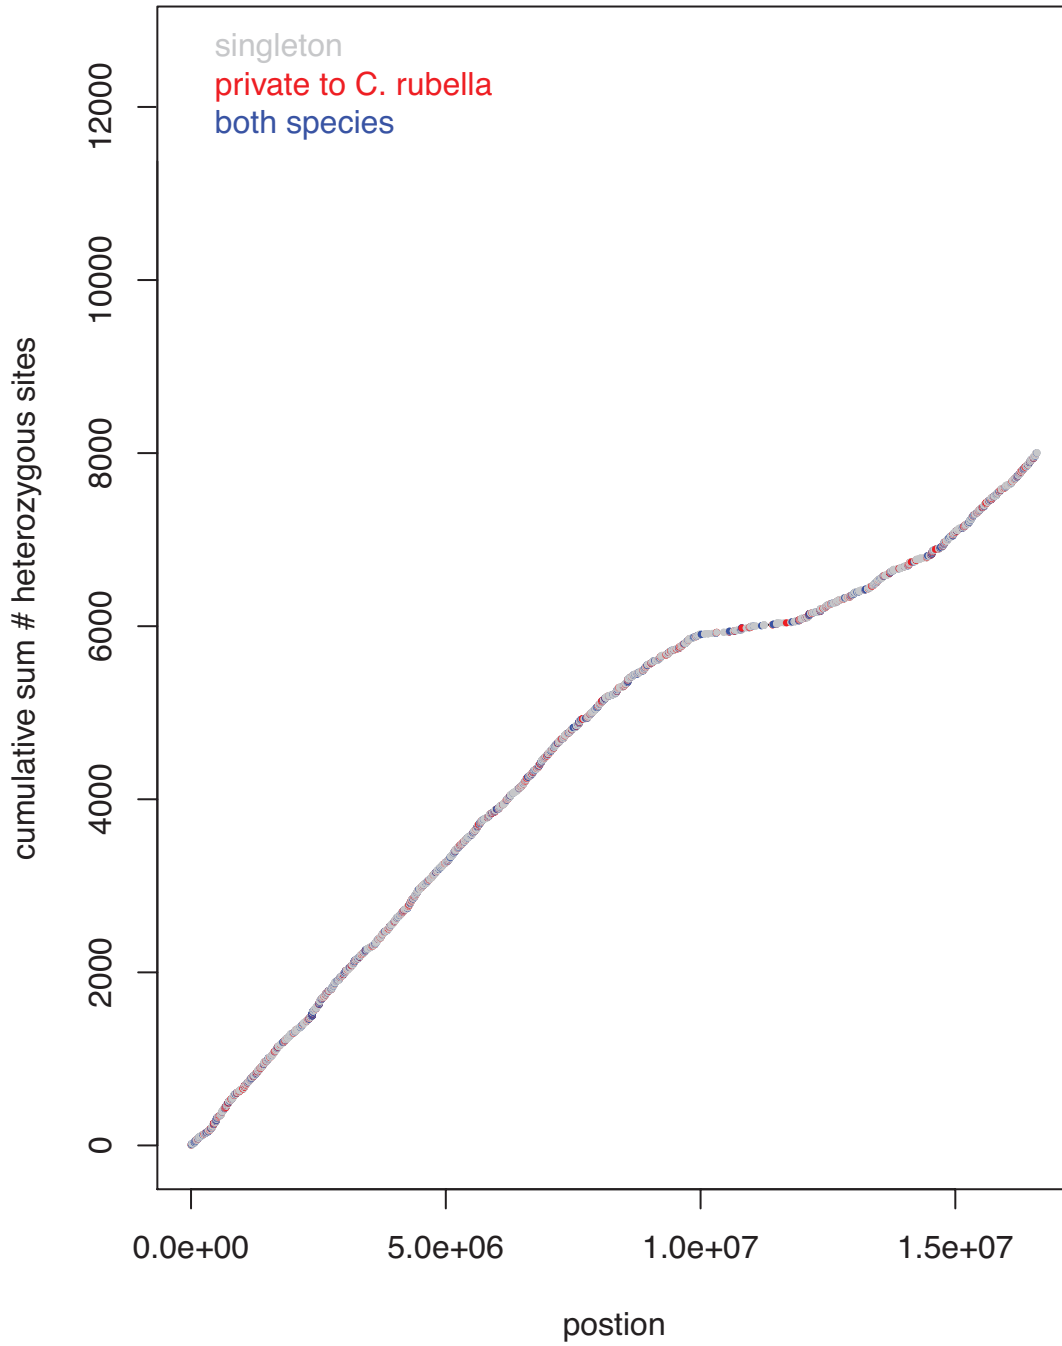

S9\_E.7) Cr1337 (Argentinian), Chromosome 7

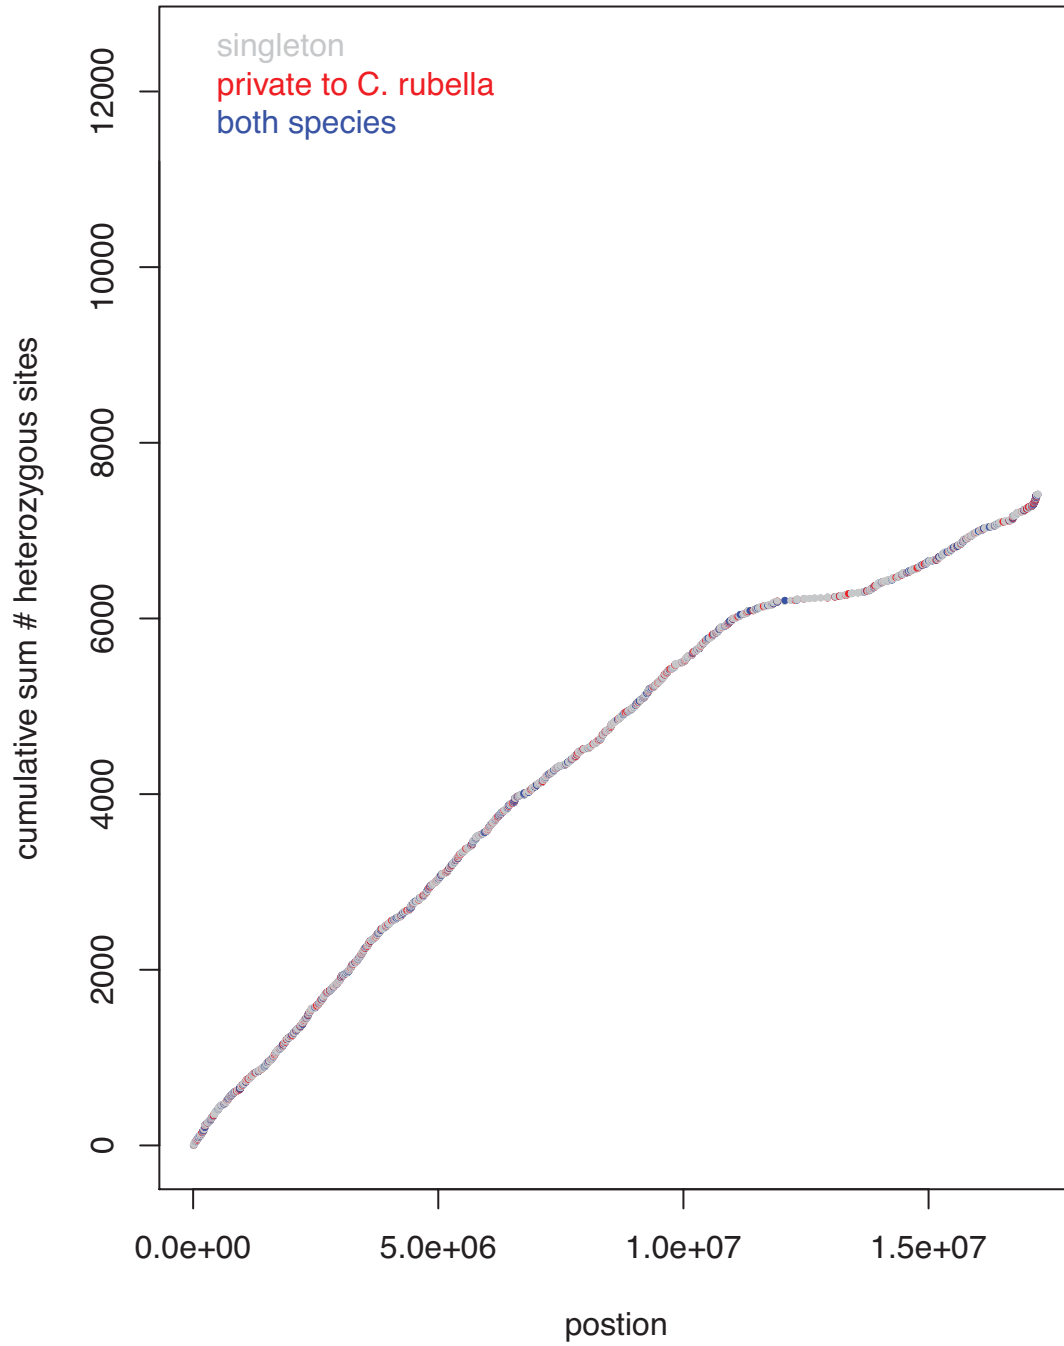

### S9\_E.8) Cr1337 (Argentinian), Chromosome 8

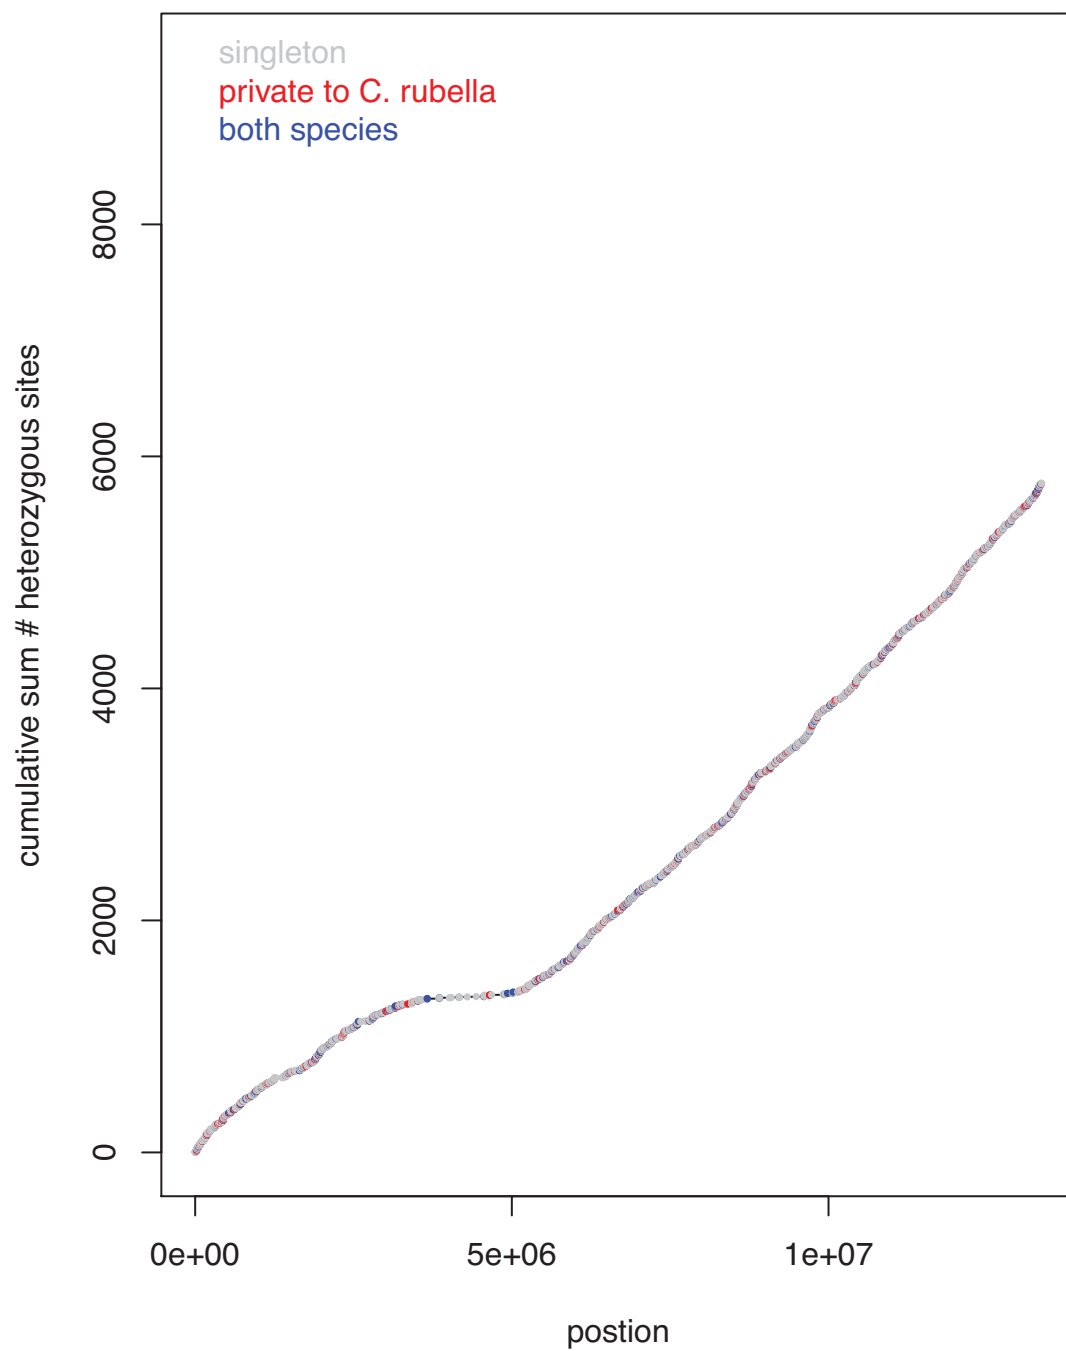



S9\_F.1) Crtaal (Algerian), Chromosome 1

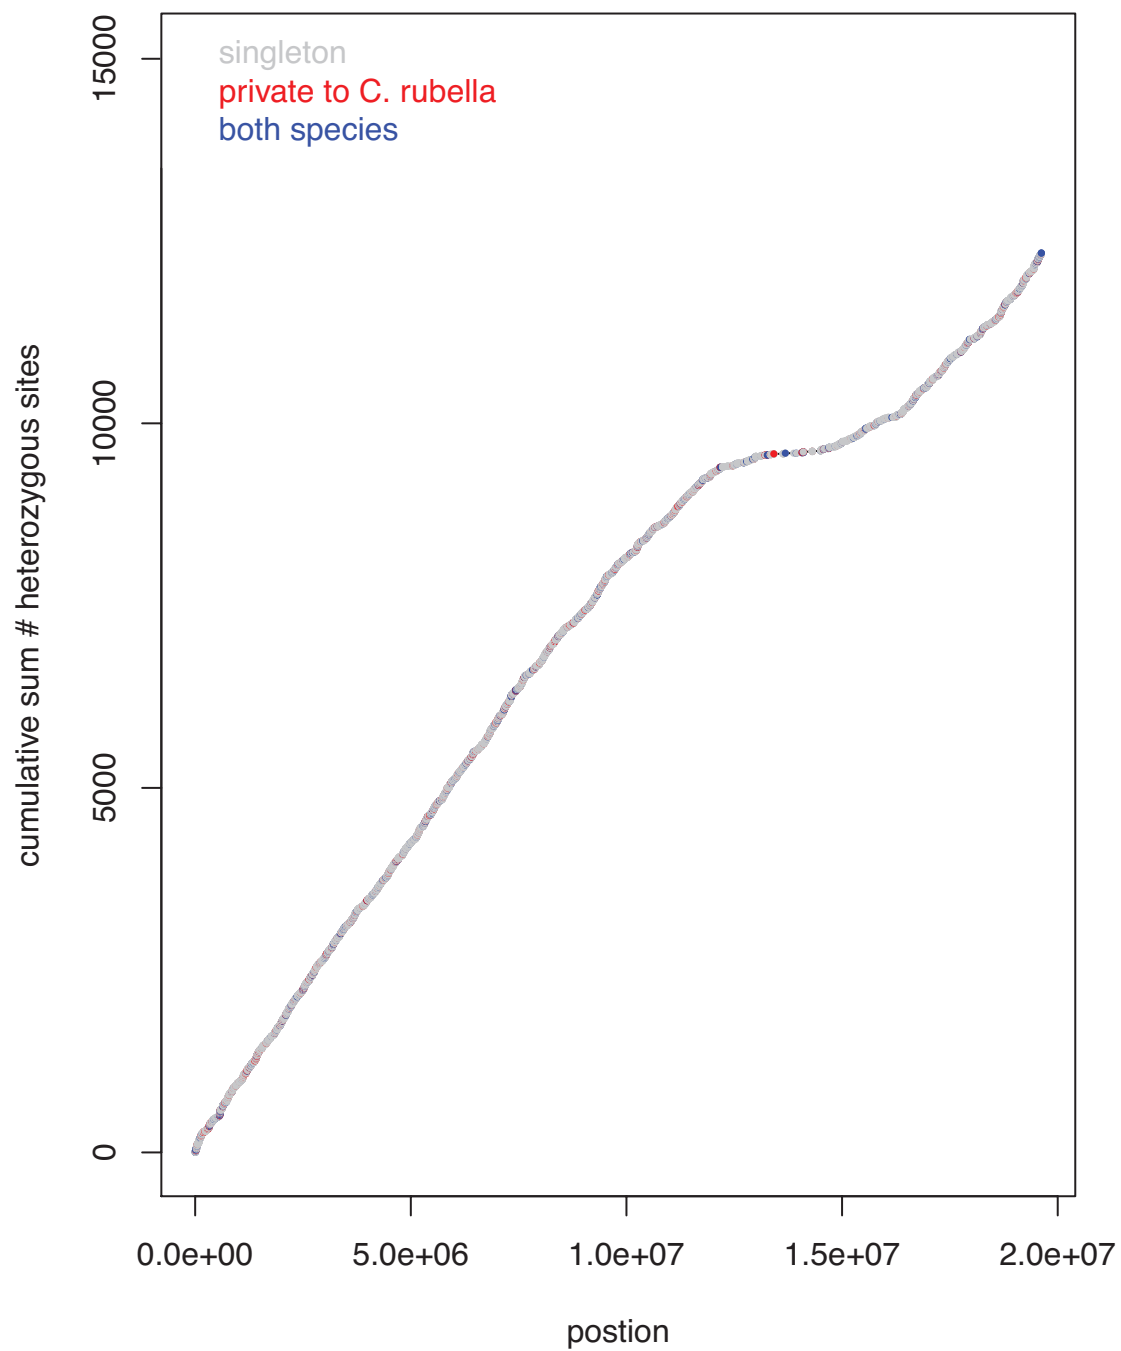

S9\_F.2)

Crtaal (Algerian), Chromosome 2

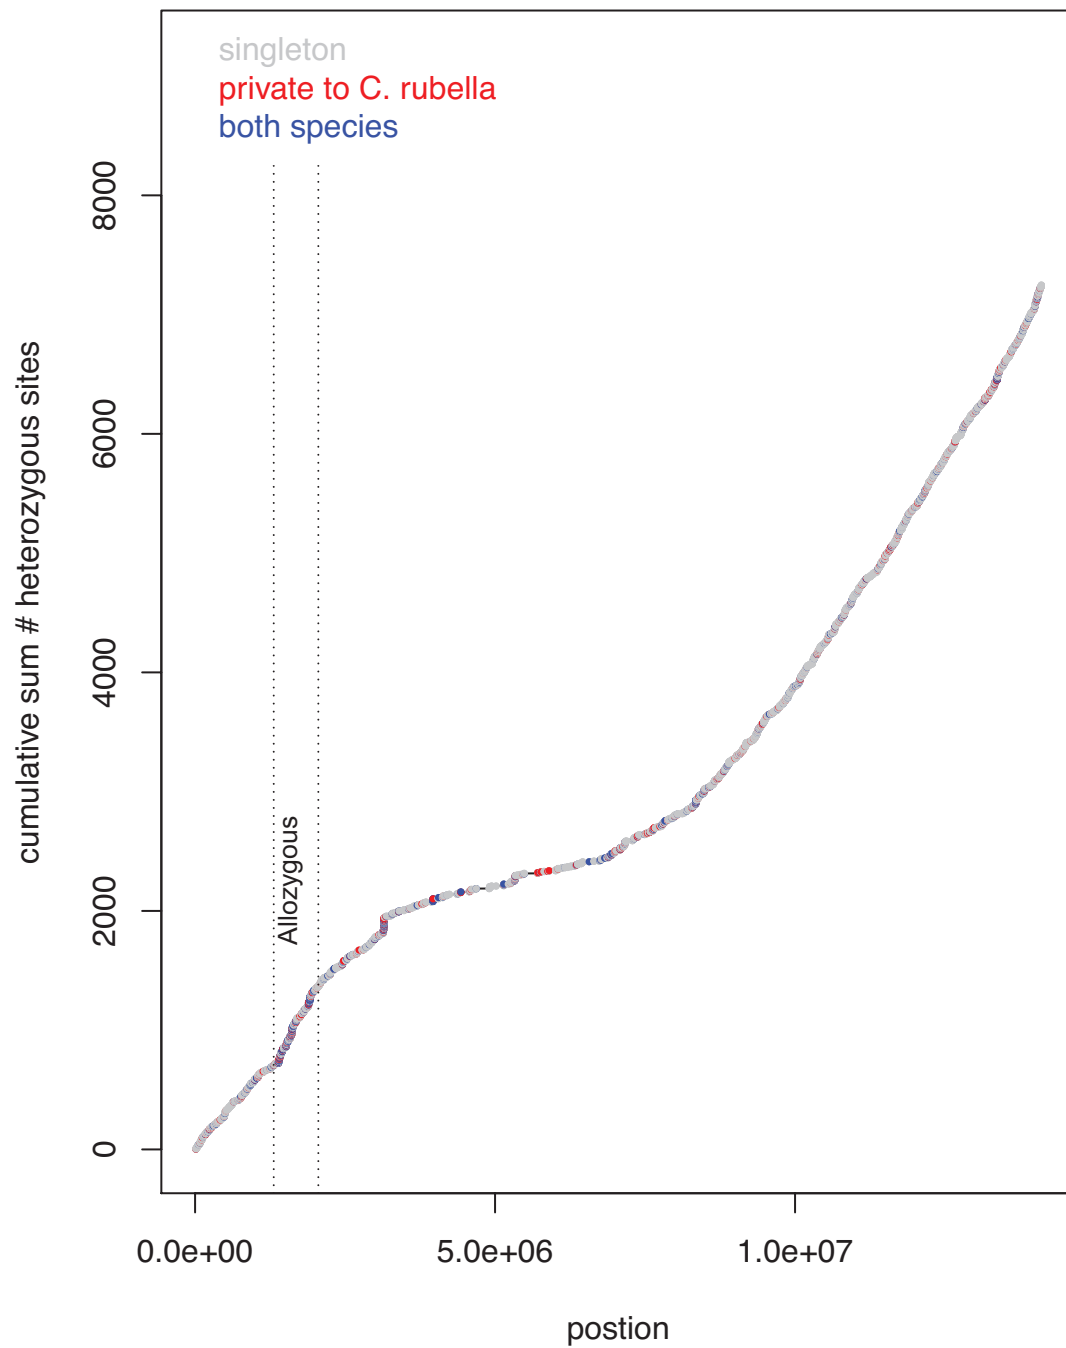

S9\_F.3)

Crtaal (Algerian), Chromosome

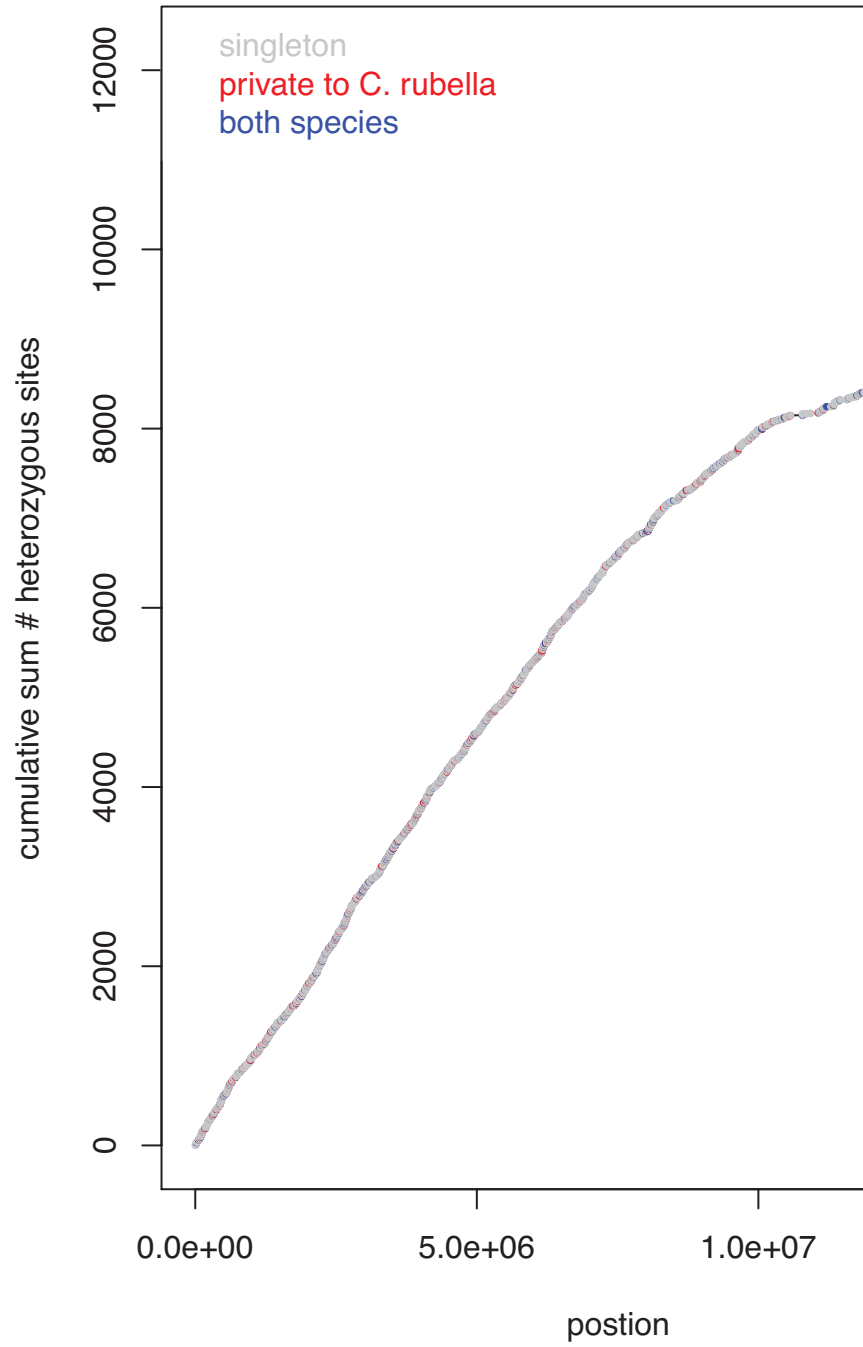

S9\_F.4) Crtaal (Algerian), Chromosome 4

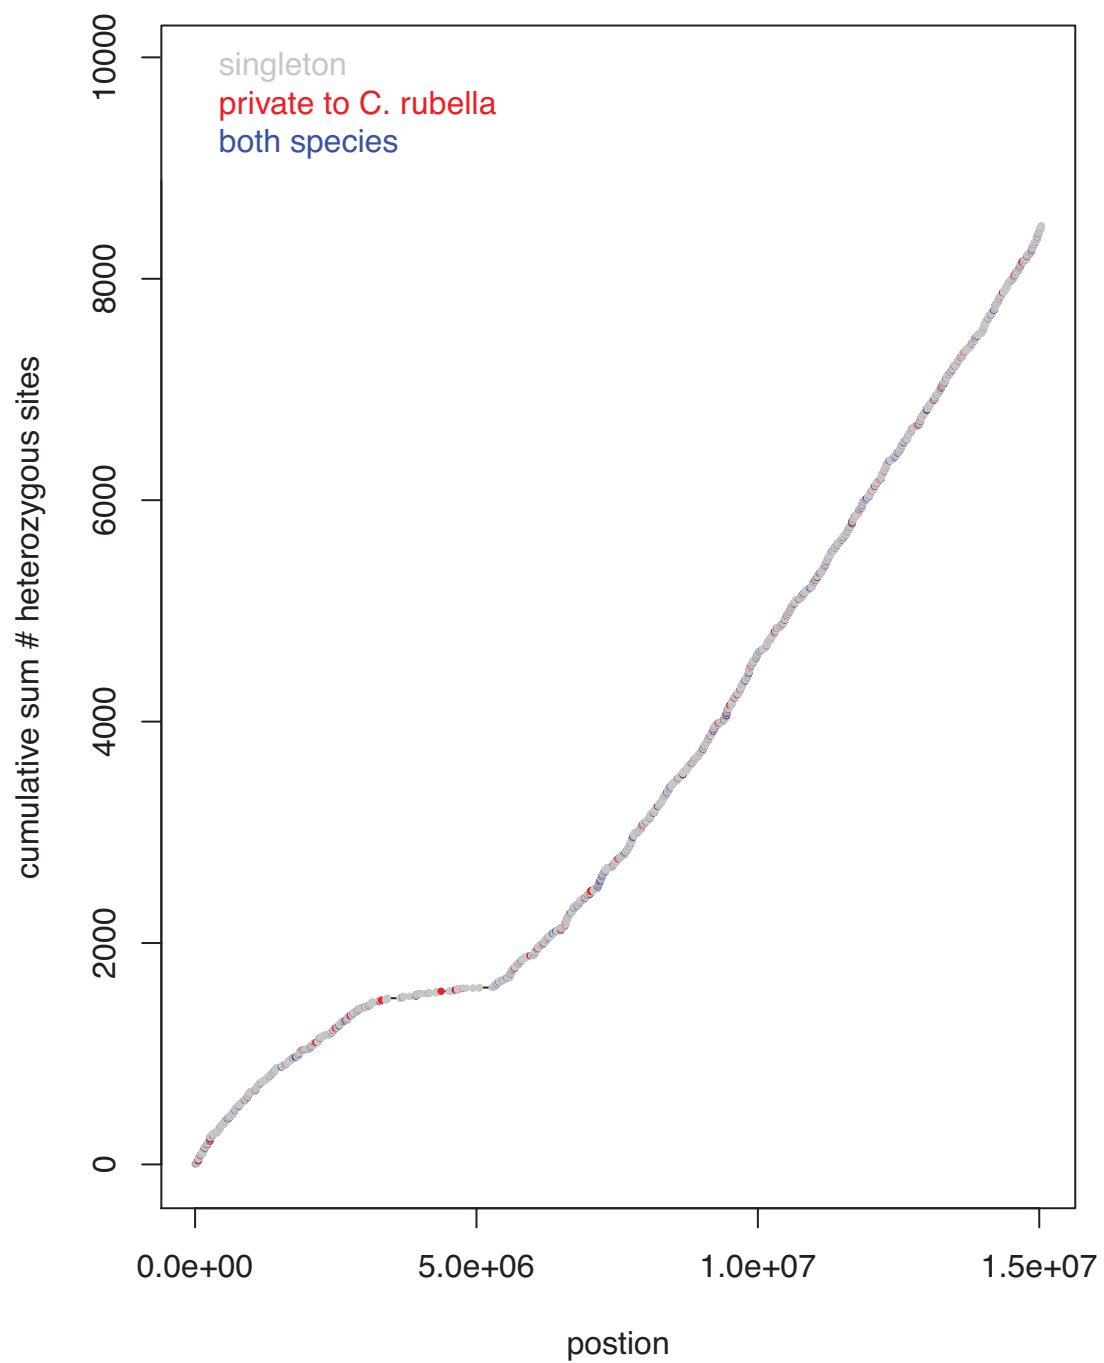

S9\_F.5)

Crtaal (Algerian), Chromosome 5

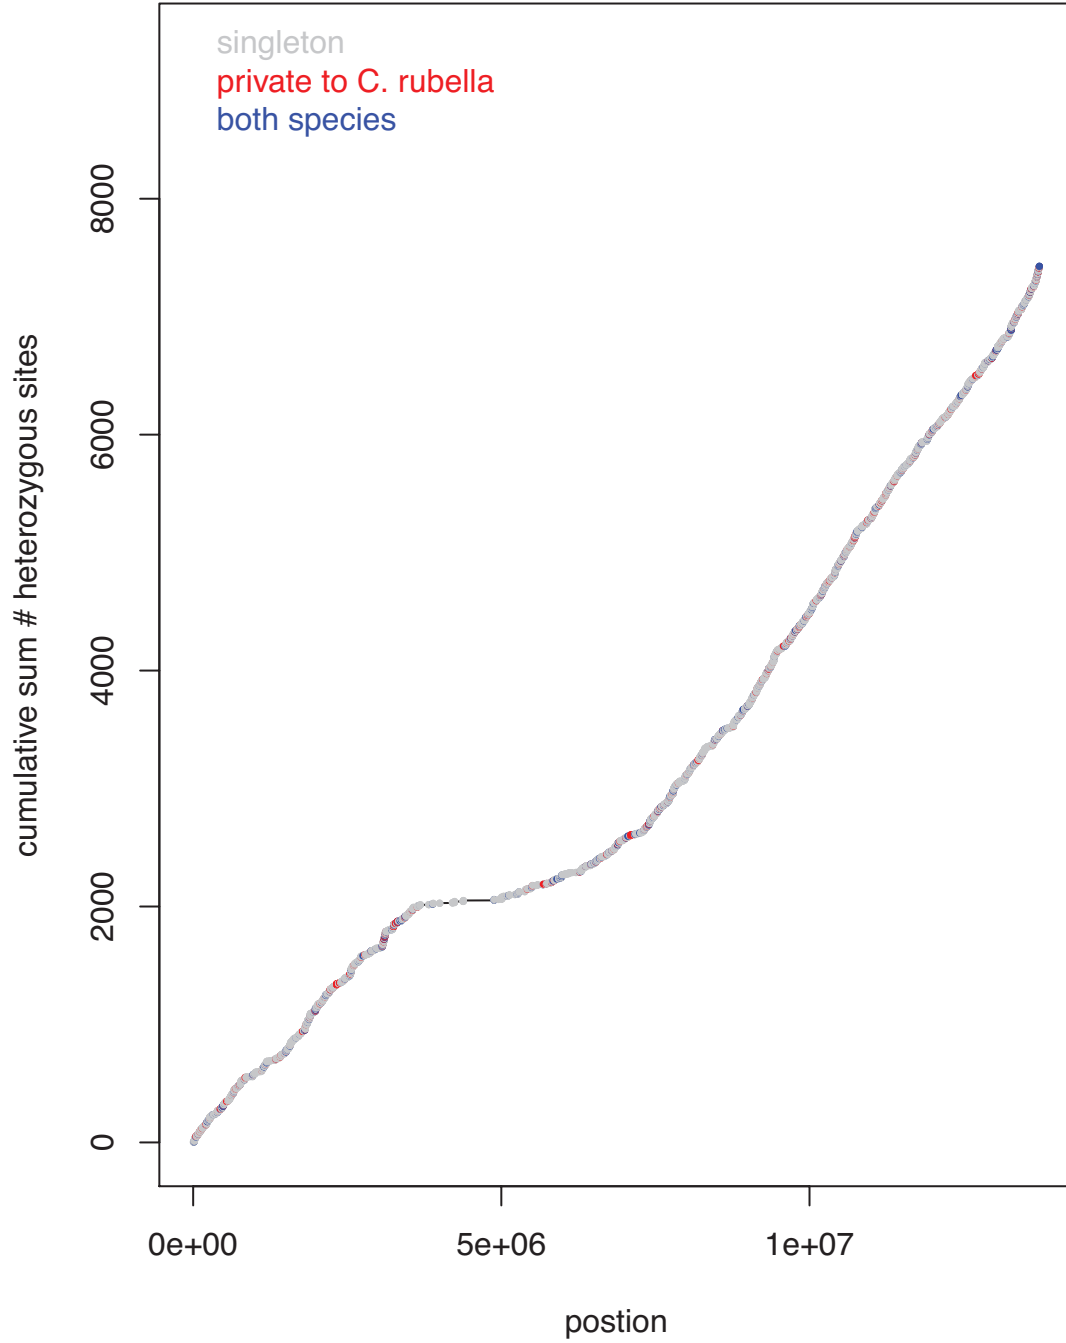

### S9\_F.6) Crtaal (Algerian), Chromosome 6

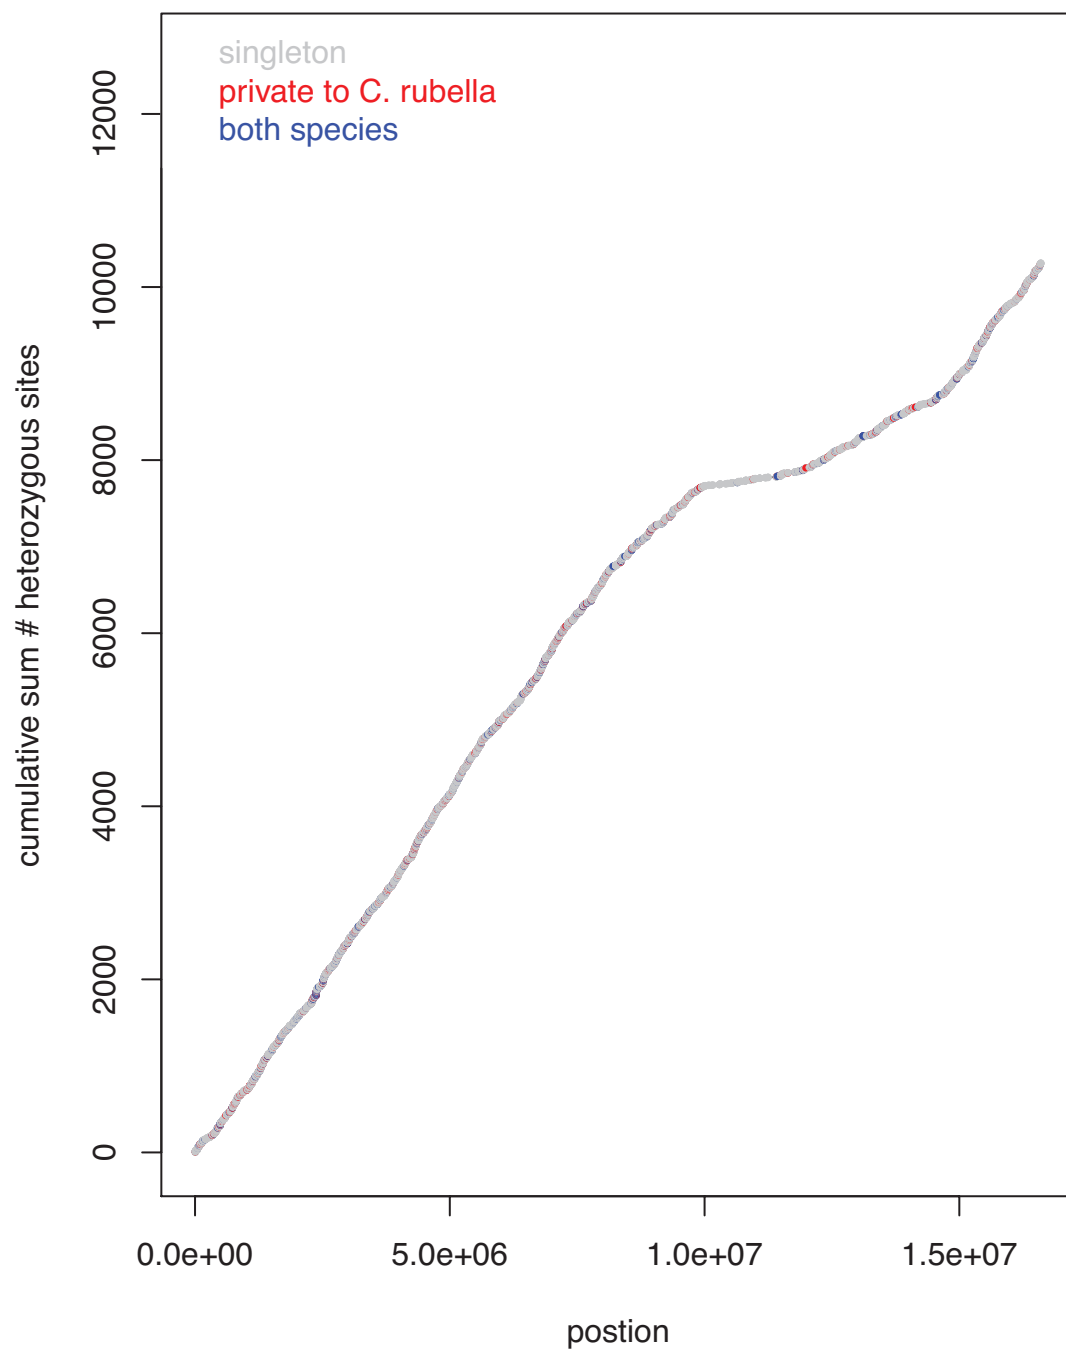

S9\_F.7)

Crtal (Algerian), Chromosome 7

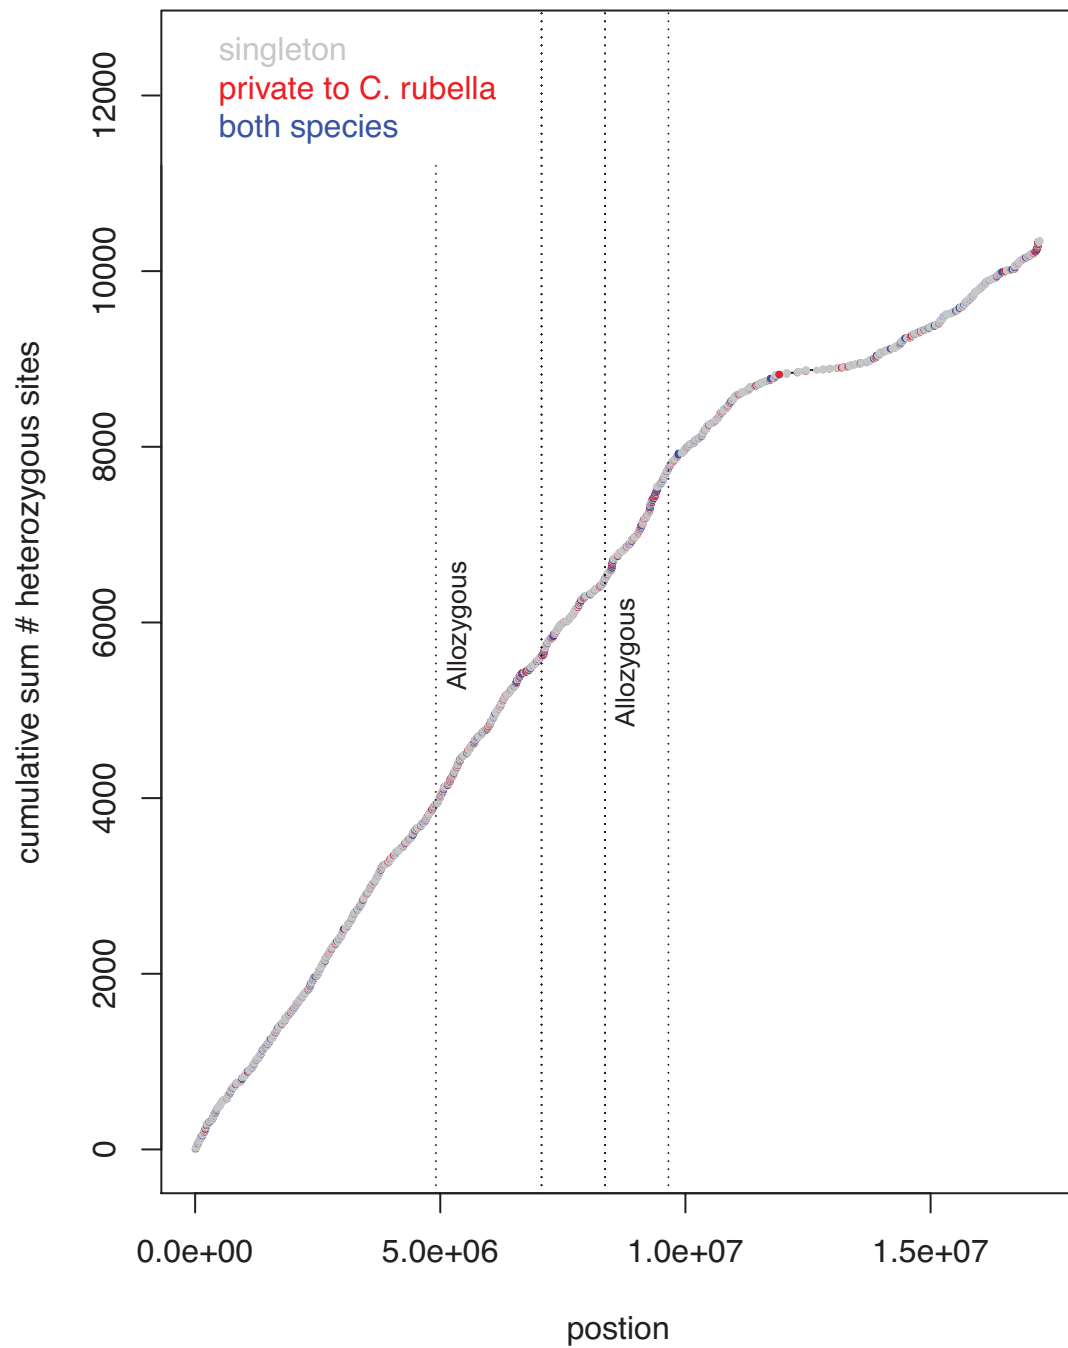

S9\_F.8) Crtaal (Algerian), Chromosome 8

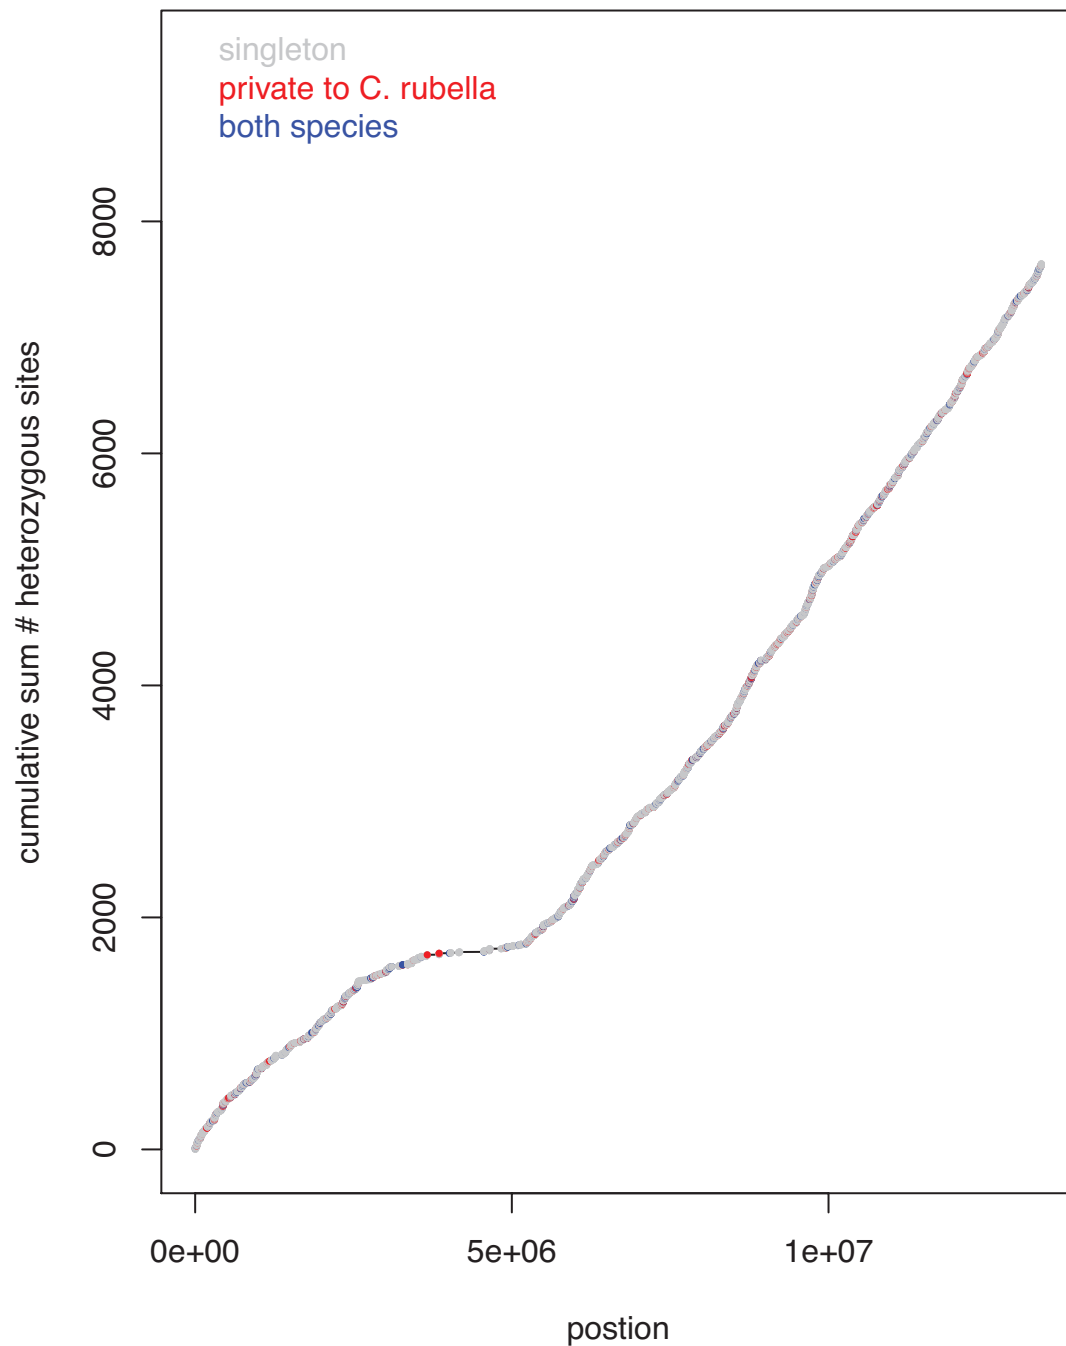

Supplement: pgen.1003754.s009.pdf [file pgen.1003754.s009.pdf]
