# Supplementary material for: Genomic Identification of Founding Haplotypes Reveals the History of the Selfing Species Capsella rubella
Source: PubMed Central journal article supplement (PMC3772084; doi:10.1371/journal.pgen.1003754), 2013-09-12

# Individual heterozygosity in autozygous and allozygous genomic regions

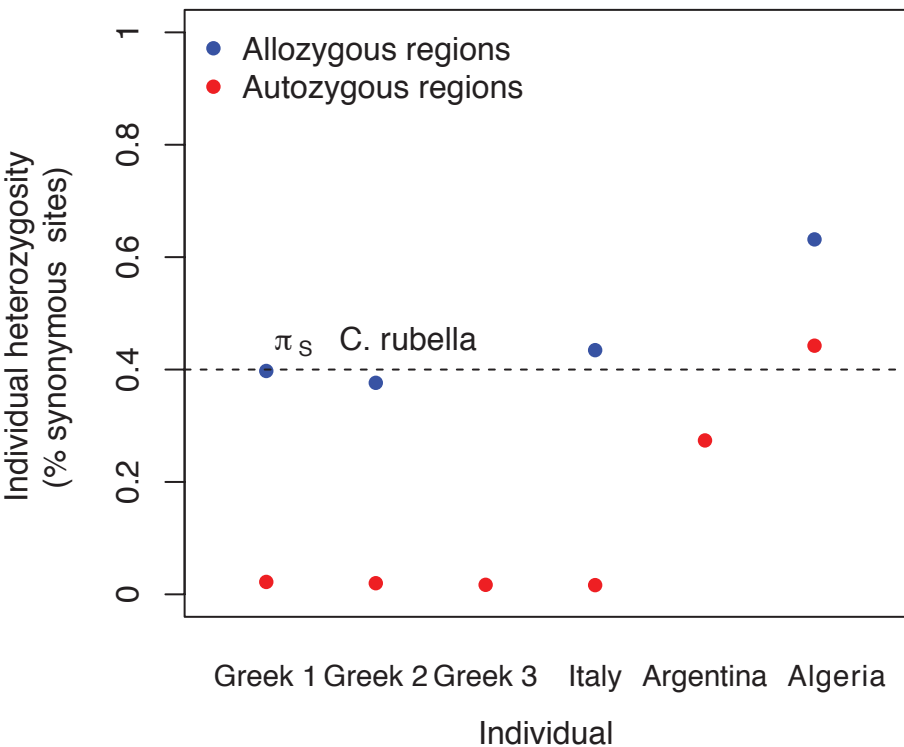

Supplement: pgen.1003754.s008.pdf [file pgen.1003754.s008.pdf]
