# Supplementary material for: Genomic Identification of Founding Haplotypes Reveals the History of the Selfing Species Capsella rubella
Source: PubMed Central journal article supplement (PMC3772084; doi:10.1371/journal.pgen.1003754), 2013-09-12
Supplement: pgen.1003754.s011.pdf [file pgen.1003754.s011.pdf]

Table S1A: Sanger sequencing efforts.

| chrom | start    | stop     | orientation | inds                               |
|-------|----------|----------|-------------|------------------------------------|
| 1     | 1121520  | 1122379  | revcomp     | Cr1Gr1, Cr75, Cr81, Crtaal         |
| 1     | 2189244  | 2189862  | revcomp     | Cr1Gr1, Cr75, Cr81, Crtaal         |
| 1     | 3187217  | 3187782  | revcomp     | Cr75, Cr81, Crtaal                 |
| 1     | 9252546  | 9253264  | forward     | Cr1337, Cr1Gr1, Cr81, Crtaal       |
| 1     | 9791410  | 9792193  | revcomp     | Cr1Gr1, Cr75, Cr81, Crtaal         |
| 1     | 12972008 | 12972691 | forward     | Cr1Gr1, Cr81, Crtaal               |
| 1     | 16978816 | 16979446 | forward     | Cr1Gr1, Crtaal                     |
| 2     | 7158433  | 7159032  | revcomp     | Cr1Gr1, Cr75, Cr81, Crtaal         |
| 2     | 9111928  | 9112538  | revcomp     | Cr75, Crtaal                       |
| 2     | 11501659 | 11502346 | revcomp     | Cr1Gr1, Cr75, Cr81, Crtaal         |
| 2     | 13499343 | 13499957 | forward     | Cr81                               |
| 3     | 4380447  | 4381090  | revcomp     | Cr81                               |
| 3     | 12783435 | 12784119 | revcomp     | Cr1Gr1, Cr75, Cr81, Crtaal         |
| 7     | 2781533  | 2782194  | forward     | Cr1Gr1, Cr75, Cr81, Crtaal         |
| 7     | 3433282  | 3434023  | revcomp     | Cr1Gr1, Cr81, Crtaal               |
| 7     | 3458572  | 3459198  | revcomp     | Cr1Gr1, Cr75, Cr81, Crtaal         |
| 7     | 4820394  | 4821059  | forward     | Cr1337, Cr1Gr1, Cr81, Crtaal       |
| 7     | 6079504  | 6080090  | forward     | Cr1337, Cr1Gr1, Cr75, Cr81, Crtaal |
| 7     | 9123830  | 9124515  | forward     | Cr1Gr1, Cr75, Cr81                 |
| 7     | 9214127  | 9214749  | forward     | Cr1Gr1, Cr75, Cr81, Crtaal         |
| 8     | 2578408  | 2579001  | revcomp     | Cr1Gr1, Cr75, Cr81, Crtaal         |
| 8     | 6671378  | 6671912  | revcomp     | Cr1Gr1, Cr75, Cr81, Crtaal         |
| 8     | 7784867  | 7785350  | forward     | Cr1Gr1, Crtaal, Cr1337, Cr75       |
| 8     | 9670696  | 9671200  | forward     | Cr1Gr1, Cr75, Cr81, Crtaal         |

*Table S1B: Comparison of genotype calls across technology (Sanger/RNA-Seq).*

| Sample | 0/0   | 2/2 | 0/NA | NA/0 | 2/NA | 0/2 | 1/1 | NA/NA |
|--------|-------|-----|------|------|------|-----|-----|-------|
| Cr1Gr1 | 12808 | 25  | 6    | 92   | 0    | 0   | 0   | 50    |
| Cr75   | 10611 | 19  | 5    | 53   | 0    | 0   | 0   | 28    |
| Cr81   | 13494 | 6   | 37   | 104  | 0    | 0   | 1   | 50    |
| Crtaal | 12904 | 8   | 369  | 139  | 2    | 2   | 0   | 50    |
| Cr1337 | 2429  | 0   | 12   | 0    | 0    | 0   | 0   | 13    |
