# Supplementary material for: Genomic Identification of Founding Haplotypes Reveals the History of the Selfing Species Capsella rubella
Source: PubMed Central journal article supplement (PMC3772084; doi:10.1371/journal.pgen.1003754), 2013-09-12
Supplement: pgen.1003754.s012.pdf [file pgen.1003754.s012.pdf]

*Table S2: Summary of haplotype information across haplotype calling cutoffs*

| $X_{\text{SNP}}$ | $Y_{\text{BP}}$ | unambiguous and<br>< 3 haplotypes | ambiguous and/or<br>> 2 haplotypes |
|------------------|-----------------|-----------------------------------|------------------------------------|
| 2                | 10 bp           | 0.77                              | 0.23                               |
| 4                | 10 bp           | 0.70                              | 0.30                               |
| 10               | 10 bp           | 0.58                              | 0.42                               |
| 2                | 1 kb            | 0.76                              | 0.24                               |
| 4                | 1 kb            | 0.70                              | 0.30                               |
| 10               | 1 kb            | 0.58                              | 0.42                               |
| 2                | 10 kb           | 0.72                              | 0.28                               |
| 4                | 10 kb           | 0.67                              | 0.33                               |
| 10               | 10 kb           | 0.57                              | 0.43                               |
| 2                | 100 kb          | 0.54                              | 0.46                               |
| 4                | 100 kb          | 0.53                              | 0.47                               |
| 10               | 100 kb          | 0.49                              | 0.51                               |
