# Supplementary material for: Genomic Identification of Founding Haplotypes Reveals the History of the Selfing Species Capsella rubella
Source: PubMed Central journal article supplement (PMC3772084; doi:10.1371/journal.pgen.1003754), 2013-09-12
Supplement: pgen.1003754.s013.pdf [file pgen.1003754.s013.pdf]

Table S3) Variation within and among *C. rubella* haplotypes:

|                                  | all                | G/G              | G/O              | O/O              |
|----------------------------------|--------------------|------------------|------------------|------------------|
| $100 \times \pi_S\%$ within haps | 5.29 [5.11-5.40]   | 5.55 [5.24-5.84] | 6.05 [5.78-6.24] | 3.48 [3.20-3.66] |
| $\pi_S\%$ among haps             | 2.01 [1.98-2.04]   | 2.02 [1.97-2.05] | 2.00 [1.96-2.03] | 2.03 [2.00-2.07] |
| $\pi_N/\pi_S$ within haps        | .438 [.425,.449]   | .416 [.392,.441] | .439 [.422,.458] | .461 [.426,.498] |
| $\pi_N/\pi_S$ among haps         | .140 [0.139,0.142] | .139 [.137,.141] | .139 [.139,.140] | .137 [.135,.139] |
